# Supplementary material for: MultiShapeC, an algorithm to assess concentration in multi-shape nanoparticle samples: nanosilver, a case study
Source: Royal Society of Chemistry journal article supplement (doi:10.1039/d2ra04078f), 2022-01-01
Supplement: d2ra04078f1.pdf [file d2ra04078f1.pdf]

## Supplementary Material (ESI) for RSC Advances

### **MultiShapeC, an algorithm to assess concentration in multi-shape nanoparticle samples: Nanosilver, a case study**

Rodrigo Nicolás Núñez,<sup>a,b</sup> Alicia Viviana Veglia<sup>a,b</sup> and Natalia Lorena Pacioni<sup>a,b,\*</sup>

<sup>a</sup>Universidad Nacional de Córdoba, Facultad de Ciencias Químicas, Departamento de Química Orgánica. Haya de la Torre y Medina Allende s/n, X5000HUA, Ciudad Universitaria, Córdoba, Argentina.

<sup>b</sup>Consejo Nacional de Investigaciones Científicas y Técnicas (CONICET), INFIQC, Córdoba, Argentina.

\*Corresponding author: nataliap@fcq.unc.edu.ar; n.lpacioni@unc.edu.ar

#### Contents

|                                                            |
|------------------------------------------------------------|
| <b>Page S1. This page</b>                                  |
| <b>Page S2. Quantification of unreacted Ag<sup>+</sup></b> |
| <b>Page S2. Figure S1</b>                                  |
| <b>Page S2. Figure S2</b>                                  |
| <b>Page S3. Figure S3</b>                                  |
| <b>Page S5. MultiShapeC tutorial</b>                       |
| <b>Page S6. References</b>                                 |

## Quantification of unreacted Ag<sup>+</sup>

To establish the correct concentration of precursor metal ions to be entered into the MultiShapeC spreadsheet, unreacted Ag<sup>+</sup> was determined using a spectrophotometric method described by Gonzalez-Fuenzalida that allows the in situ quantification of Ag<sup>+</sup> in presence of AgNP.<sup>1</sup> After the reaction between freshly prepared colloidal silver spiked with standard solutions of Ag<sup>+</sup> and 3,3',5,5'-tetramethylbenzidine (TMB), the oxidized form of TMB (oxTMB), which has a blue color, was obtained. UV-vis spectra were measured for each sample (Fig. S1) and the difference in absorbance signal at 656.0 nm and 543.0 nm ( $\Delta\text{Abs}_{656-543}$ ) was recorded to perform calibration using the standard addition method (MOSA). The calibration curve is shown in Fig. S2. The slope of the calibration curve was  $(110 \pm 2) 10^{-4} \text{ M}^{-1}$  and the intercept was equal to zero, indicating that the amount of unreacted Ag<sup>+</sup> was less than the detection limit of the method. The detection limit (DL), calculated as  $\text{DL} = 3,3 \text{ Sb/m}$  (Sb: standard deviation of the blanks; m: slope of the calibration curve), was equal to 3.5  $\mu\text{M}$ .

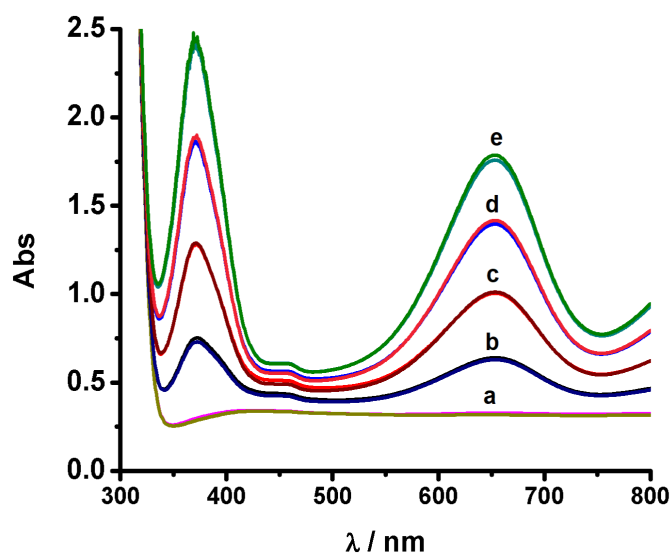

**Figure S1.** UV-vis spectra of AgNR solutions spiked with increasing concentrations of Ag<sup>+</sup> 0 - 100  $\mu\text{M}$  (a-e) in presence of TMB.

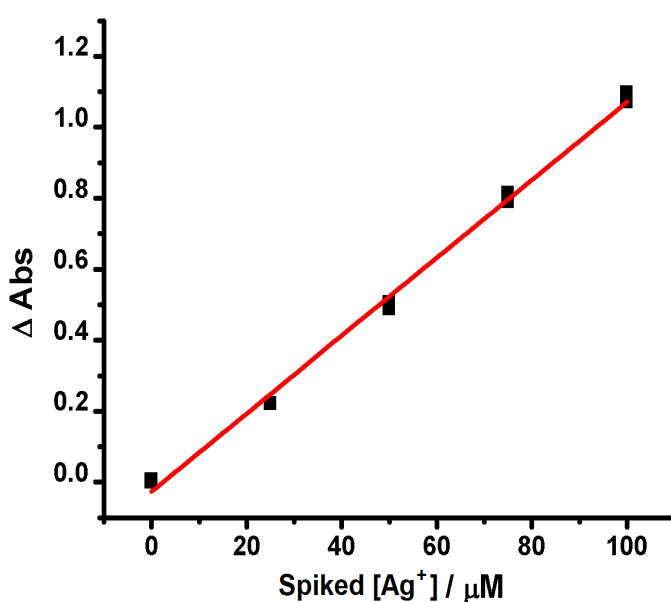

**Figure S2.** MOSA calibration of spiked samples of AgNR by duplicate.

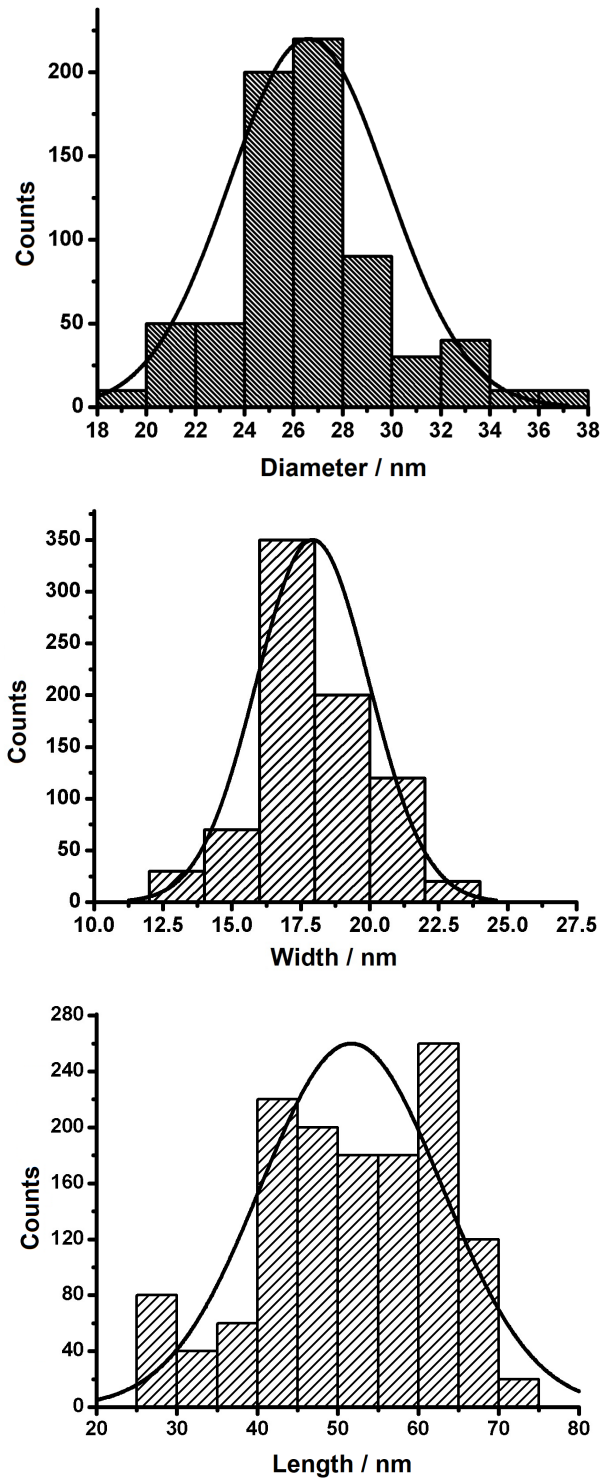

**Figure S3.** Size distribution histograms of the synthesized silver nanospheres and nanorods. For spheres, particles have a mean diameter of 26 (3) nm. The rod-shaped particles have a mean length of 54 (9) nm and a width of 18 (2) nm. The standard deviation is shown in brackets.

## MultiShapeC Algorithm Tutorial

*\*All data is considered as nm, no use of exponential for sizes is required.*

1- NP's atoms identity must be indicated in the “NP metal” cell, colored light blue. Only silver and gold nanoparticles are considered. (Complete the cell with ag, Ag or silver; au, Au or gold, depending on your nanomaterial). This must be indicated in the page “General data input and results”.

|    | A | B                  | C        | D |
|----|---|--------------------|----------|---|
| 1  |   |                    |          |   |
| 2  |   |                    |          |   |
| 3  |   |                    |          |   |
| 4  |   |                    |          |   |
| 5  |   | Metallic radius Ag | NP metal |   |
| 6  |   | 0.1445             | silver   |   |
| 7  |   | Metallic radius Au |          |   |
| 8  |   | 0.1442             |          |   |
| 9  |   |                    |          |   |
| 10 |   | X <sub>NP</sub> =  | 0.47     |   |
| 11 |   |                    |          |   |
| 12 |   | X <sub>NN</sub> =  | 0.53     |   |
| 13 |   |                    |          |   |
| 14 |   |                    |          |   |
| 15 |   | ISI / M =          | 0.001    |   |
| 16 |   |                    |          |   |
| 17 |   |                    |          |   |

2- The spreadsheet only needs electron microscopy data to perform the calculations. For spherical particles, data must be entered into the page named SPHERES-DATA IMPUT, specifically in the column “Distribution percentages NP<sub>i</sub>”. These percentages should be calculated for particles with the diameters indicated in the “Diameter<sub>i</sub>” column. Diameters SHOULD NOT be edited, as MultiShapeC does calculations assuming 1 nm intervals. If there are no particles of a certain diameter in your sample, enter zeros.

|    | A                 | B                                            | C              | D                          |
|----|-------------------|----------------------------------------------|----------------|----------------------------|
| 1  |                   | INSERT DATA HERE                             |                |                            |
| 2  |                   |                                              |                |                            |
| 3  |                   | Distribution percentages NP <sub>i</sub> / % | F <sub>i</sub> | Diameter <sub>i</sub> / nm |
| 4  |                   | 0                                            | 0              | 6.5                        |
| 5  |                   | 0                                            | 0              | 7.5                        |
| 6  |                   | 0                                            | 0              | 8.5                        |
| 7  |                   | 0                                            | 0              | 9.5                        |
| 8  |                   | 0                                            | 0              | 10.5                       |
| 9  |                   | 0                                            | 0              | 11.5                       |
| 10 |                   | 0                                            | 0              | 12.5                       |
| 11 |                   | 0                                            | 0              | 13.5                       |
| 12 |                   | 0                                            | 0              | 14.5                       |
| 13 |                   | 0                                            | 0              | 15.5                       |
| 14 | OBSERVATIONS      | 0                                            | 0              | 15.5                       |
| 15 | Check percentages | 0                                            | 0              | 16.5                       |
| 16 | 0                 | 0                                            | 0              | 17.5                       |
| 17 |                   | 0                                            | 0              | 18.5                       |
| 18 |                   | 0                                            | 0              | 19.5                       |
| 19 |                   | 0                                            | 0              | 20.5                       |

Anisotropic particles data is entered on the page named RODS POPULATION-DATA IMPUT, which is designed as a data matrix for particles of any combination of sizes (width and length). For rods, data must be the presence fraction, and not percentage as for spheres. Again, all calculations are performed considering 1 nm intervals. For this case, if no particle of a certain length and width is present, the cells can be left blank.



|    | A | B                  | C        | D | E |
|----|---|--------------------|----------|---|---|
| 1  |   |                    |          |   |   |
| 2  |   |                    |          |   |   |
| 3  |   |                    |          |   |   |
| 4  |   |                    |          |   |   |
| 5  |   | Metallic radius Ag | NP metal |   |   |
| 6  |   | 0.1445             | silver   |   |   |
| 7  |   | Metallic radius Au |          |   |   |
| 8  |   | 0.1442             |          |   |   |
| 9  |   |                    |          |   |   |
| 10 |   | $X_{NP} =$         | 0.47     |   |   |
| 11 |   |                    |          |   |   |
| 12 |   | $X_{NR} =$         | 0.53     |   |   |
| 13 |   |                    |          |   |   |
| 14 |   |                    |          |   |   |
| 15 |   | $[SI] / M =$       | 0.001    |   |   |
| 16 |   |                    |          |   |   |
| 17 |   |                    |          |   |   |

MultiShapeC Cover GENERAL DATA INPUT AND RESULTS SPHERES

8- To perform the calculation of the total concentration of NP, MOLAR concentration of silver or gold cations must be informed in the cell [S] (page GENERAL DATA INPUT AND RESULTS). Simultaneously, the concentration of spheres, rods and the total concentration are calculated, and the results are displayed in the cells [NP], [NR] and [NT], respectively. All calculated concentrations are molar (moles of particles per liter).

|    | A | B                  | C        | D | E | F                                  | G        | H |
|----|---|--------------------|----------|---|---|------------------------------------|----------|---|
| 1  |   |                    |          |   |   |                                    |          |   |
| 2  |   |                    |          |   |   |                                    |          |   |
| 3  |   |                    |          |   |   |                                    |          |   |
| 4  |   |                    |          |   |   |                                    |          |   |
| 5  |   | Metallic radius Ag | NP metal |   |   | PARTICLE CONCENTRATIONS            |          |   |
| 6  |   | 0.1445             | silver   |   |   | $[NP] / M =$                       | 8.29E-09 |   |
| 7  |   | Metallic radius Au |          |   |   | $[NR] / M =$                       | 9.35E-09 |   |
| 8  |   | 0.1442             |          |   |   |                                    |          |   |
| 9  |   |                    |          |   |   |                                    |          |   |
| 10 |   | $X_{NP} =$         | 0.47     |   |   |                                    |          |   |
| 11 |   |                    |          |   |   |                                    |          |   |
| 12 |   | $X_{NR} =$         | 0.53     |   |   | $[NT] / M =$                       | 1.76E-08 |   |
| 13 |   |                    |          |   |   |                                    |          |   |
| 14 |   |                    |          |   |   |                                    |          |   |
| 15 |   | $[SI] / M =$       | 0.001    |   |   | Calculated particle concentrations |          |   |
| 16 |   |                    |          |   |   |                                    |          |   |
| 17 |   |                    |          |   |   |                                    |          |   |

MultiShapeC Cover GENERAL DATA INPUT AND RESULTS SPHERES-DATA INPUT RODS POPULATION-DATA INPUT

**Metal ion concentration**

## Reference

S1. González-Fuenzalida, R. A.; Moliner-Martínez, Y.; González-Béjar, M.; Molins-Legua, C.; Verdú-Andres, J.; Pérez-Prieto, J.; Campins-Falcó, P. In Situ Colorimetric Quantification of Silver Cations in the Presence of Silver Nanoparticles. *Anal. Chem.* 2013, 85 (21), 10013–10016. <https://doi.org/10.1021/ac402822d>.
