# Supplementary material for: MultiShapeC, an algorithm to assess concentration in multi-shape nanoparticle samples: nanosilver, a case study
Source: RSC Adv. 2022 Sep 20;12(41):26550–5. doi: 10.1039/d2ra04078f (PMC9486825; doi:10.1039/d2ra04078f)
Supplement: RA-012-D2RA04078F-s002 [file RA-012-D2RA04078F-s002.xlsx]

## Sheet: MultiShapeC Cover
	MultiShapeC, an algorithm to assess concentration in multi-shape
	nanoparticle samples: Nanosilver, a case study
	Rodrigo Nicolás Núñez,a,b Alicia Viviana Vegliaa,b and Natalia Lorena Pacioni.a,b*
	aUniversidad Nacional de Córdoba, Facultad de Ciencias Químicas, Departamento de Química Orgánica, Haya
	de la Torre y Medina Allende s/n, X5000HUA, Ciudad Universitaria, Córdoba, Argentina.
	bConsejo Nacional de Investigaciones Científicas y Técnicas (CONICET), INFIQC, Córdoba, Argentina.
	*Corresponding author: nataliap@fcq.unc.edu.ar; n.lpacioni@unc.edu.ar
	This file is an open access tool for determining nanoparticle concentration
	A tutorial on how to use this file can be found in the electronic supplementary information (ESI) file of our paper
	Check next pages to use MultiShapeC ------>

## Sheet: GENERAL DATA IMPUT AND RESULTS
	Metallic radius Ag	NP metal			PARTICLE CONCENTRATIONS
	0.1445	Ag
	Metallic radius Au				[NP] / M =	1.55427e-10
	0.1442
					[NR] / M =	1.39884e-09
	XNP=	0.1
	XNR=	0.9			[NT] / M =	1.55427e-09
	[S] / M =	0.001

## Sheet: SPHERES-DATA IMPUT
	INSERT DATA HERE ↓
	Distribution percentages NP i / %	F i	Diameter i / nm	V NP i / nm3	Atoms per particle i	S i	Sum S i
	0	0	6.5	143.793	11377.5	0	241276
	0	0	7.5	220.893	17477.9	0
	0	0	8.5	321.555	25442.7	0
	0	0	9.5	448.921	35520.4	0
	5	0.05	10.5	606.131	47959.5	2397.97
	5	0.05	11.5	796.328	63008.6	3150.43
	10	0.1	12.5	1022.65	80916.4	8091.64
	15	0.15	13.5	1288.25	101931	15289.7
	30	0.3	14.5	1596.26	126302	37890.6
OBSERVATIONS	20	0.2	15.5	1949.82	154277	30855.4
OK	10	0.1	16.5	2352.07	186105	18610.5
100	5	0.05	17.5	2806.16	222035	11101.7
	0	0	18.5	3315.23	262314	0
	0	0	19.5	3882.42	307192	0
	0	0	20.5	4510.87	356918	0
	0	0	21.5	5203.72	411739	0
	0	0	22.5	5964.12	471904	0
	0	0	23.5	6795.2	537663	0
	0	0	24.5	7700.11	609263	0
	0	0	25.5	8681.99	686953	0
	0	0	26.5	9743.98	770982	0
	0	0	28.5	12120.9	959050	0
	0	0	29.5	13442	1.06359e+06	0
	0	0	30.5	14855.9	1.17545e+06	0
	0	0	31.5	16365.5	1.29491e+06	0
	0	0	32.5	17974.2	1.42219e+06	0
	0	0	33.5	19684.9	1.55755e+06	0
	0	0	34.5	21500.9	1.70123e+06	0
	0	0	35.5	23425.2	1.8535e+06	0
	0	0	36.5	25461.1	2.01458e+06	0
	0	0	37.5	27611.7	2.18474e+06	0
	0	0	38.5	29880	2.36422e+06	0
	0	0	39.5	32269.3	2.55328e+06	0
	0	0	40.5	34782.7	2.75215e+06	0
	0	0	41.5	37423.4	2.96108e+06	0
	0	0	42.5	40194.4	3.18034e+06	0
	0	0	43.5	43098.9	3.41016e+06	0
	0	0	44.5	46140.1	3.65079e+06	0
	0	0	45.5	49321.1	3.90248e+06	0
	0	0	46.5	52645	4.16548e+06	0
	0	0	47.5	56115.1	4.44004e+06	0
	0	0	48.5	59734.3	4.72641e+06	0
	0	0	49.5	63505.9	5.02484e+06	0
	0	0	50.5	67433	5.33557e+06	0
	0	0	51.5	71518.8	5.65885e+06	0
	0	0	52.5	75766.4	5.99493e+06	0
	0	0	53.5	80178.9	6.34407e+06	0
	0	0	54.5	84759.4	6.7065e+06	0
	0	0	55.5	89511.2	7.08248e+06	0
	0	0	56.5	94437.4	7.47226e+06	0
	0	0	57.5	99541	7.87608e+06	0
	0	0	58.5	104825	8.29419e+06	0
	0	0	59.5	110293	8.72685e+06	0
	0	0	60.5	115948	9.17429e+06	0
	0	0	61.5	121793	9.63678e+06	0
	0	0	62.5	127832	1.01145e+07	0
	0	0	63.5	134066	1.06079e+07	0
	0	0	64.5	140500	1.11169e+07	0
	0	0	65.5	147137	1.16421e+07	0
	0	0	66.5	153980	1.21835e+07	0
	0	0	67.5	161031	1.27414e+07	0
	0	0	68.5	168295	1.33161e+07	0
	0	0	69.5	175773	1.39079e+07	0
	0	0	70.5	183470	1.45169e+07	0
	0	0	71.5	191389	1.51434e+07	0
	0	0	72.5	199532	1.57878e+07	0
	0	0	73.5	207903	1.64501e+07	0
	0	0	74.5	216505	1.71307e+07	0
	0	0	75.5	225341	1.78298e+07	0
	0	0	76.5	234414	1.85477e+07	0
	0	0		Set NP diameter	#VALUE!	Set NP metal identity
	0	0		Set NP diameter	#VALUE!	Set NP metal identity
	0	0		Set NP diameter	#VALUE!	Set NP metal identity
	0	0		Set NP diameter	#VALUE!	Set NP metal identity
	0	0		Set NP diameter	#VALUE!	Set NP metal identity
	0	0		Set NP diameter	#VALUE!	Set NP metal identity
	0	0		Set NP diameter	#VALUE!	Set NP metal identity
	0	0		Set NP diameter	#VALUE!	Set NP metal identity
	0	0		Set NP diameter	#VALUE!	Set NP metal identity
	0	0		Set NP diameter	#VALUE!	Set NP metal identity
	0	0		Set NP diameter	#VALUE!	Set NP metal identity
	0	0		Set NP diameter	#VALUE!	Set NP metal identity
	0	0		Set NP diameter	#VALUE!	Set NP metal identity
	0	0		Set NP diameter	#VALUE!	Set NP metal identity
	0	0		Set NP diameter	#VALUE!	Set NP metal identity
	0	0		Set NP diameter	#VALUE!	Set NP metal identity
	0	0		Set NP diameter	#VALUE!	Set NP metal identity
	0	0		Set NP diameter	#VALUE!	Set NP metal identity
	0	0		Set NP diameter	#VALUE!	Set NP metal identity
	0	0		Set NP diameter	#VALUE!	Set NP metal identity
	0	0		Set NP diameter	#VALUE!	Set NP metal identity
	0	0		Set NP diameter	#VALUE!	Set NP metal identity
	0	0		Set NP diameter	#VALUE!	Set NP metal identity
	0	0		Set NP diameter	#VALUE!	Set NP metal identity
	0	0		Set NP diameter	#VALUE!	Set NP metal identity
	0	0		Set NP diameter	#VALUE!	Set NP metal identity
	0	0		Set NP diameter	#VALUE!	Set NP metal identity
	0	0		Set NP diameter	#VALUE!	Set NP metal identity
	0	0		Set NP diameter	#VALUE!	Set NP metal identity
	0	0		Set NP diameter	#VALUE!	Set NP metal identity
	0	0		Set NP diameter	#VALUE!	Set NP metal identity
	0	0		Set NP diameter	#VALUE!	Set NP metal identity
	0	0		Set NP diameter	#VALUE!	Set NP metal identity
	0	0		Set NP diameter	#VALUE!	Set NP metal identity
	0	0		Set NP diameter	#VALUE!	Set NP metal identity
	0	0		Set NP diameter	#VALUE!	Set NP metal identity

## Sheet: RODS POPULATION-DATA IMPUT
	Width	0.5	1.5	2.5	3.5	4.5	5.5	6.5	7.5	8.5	9.5	10.5	11.5	12.5	13.5	14.5	15.5	16.5	17.5	18.5	19.5	20.5	21.5	22.5	23.5	24.5	25.5	26.5	27.5	28.5	29.5	30.5	31.5	32.5	33.5	34.5	35.5	36.5	37.5	38.5	39.5	40.5	41.5	42.5	43.5	44.5	45.5	46.5	47.5
Length
0.5
1.5
2.5
3.5
4.5
5.5
6.5
7.5
8.5
9.5
10.5
11.5
12.5
13.5
14.5
15.5
16.5
17.5
18.5
19.5
20.5
21.5
22.5
23.5
24.5
25.5
26.5
27.5
28.5
29.5
30.5
31.5
32.5
33.5
34.5
35.5
36.5
37.5
38.5
39.5
40.5
41.5
42.5
43.5
44.5
45.5
46.5
47.5
48.5
49.5
50.5
51.5
52.5
53.5
54.5
55.5
56.5
57.5
58.5							0.1
59.5							0.1		0.1
60.5								0.2
61.5								0.2
62.5									0.1
63.5
64.5								0.05
65.5								0.05		0.1
66.5
67.5
68.5
69.5
70.5
71.5
72.5
73.5
74.5
75.5
76.5
77.5
78.5
79.5
80.5
81.5
82.5
83.5
84.5
85.5
86.5
87.5
88.5
89.5
90.5
91.5
92.5
93.5
94.5
95.5
96.5
97.5
98.5
99.5
100.5
	Observations
	OK
	1
[truncated: 53 more columns]

## Sheet: RODS-volumes (do not edit)
	Width / nm	0.5	1.5	2.5	3.5	4.5	5.5	6.5	7.5	8.5	9.5	10.5	11.5	12.5	13.5	14.5	15.5	16.5	17.5	18.5	19.5	20.5	21.5	22.5	23.5	24.5	25.5	26.5	27.5	28.5	29.5	30.5	31.5	32.5	33.5	34.5	35.5	36.5	37.5	38.5	39.5	40.5	41.5	42.5	43.5	44.5	45.5	46.5	47.5
Length / nm
0.5		0.3927	3.5343	9.8175	19.2423	31.8087	47.5167	66.3663	88.3575	113.49	141.765	173.181	207.738	245.437	286.278	330.261	377.385	427.65	481.058	537.606	597.297	660.129	726.102	795.217	867.474	942.873	1021.41	1103.09	1187.92	1275.88	1366.99	1461.24	1558.63	1659.16	1762.83	1869.64	1979.6	2092.7	2208.94	2328.32	2450.84	2576.5	2705.31	2837.26	2972.35	3110.58	3251.95	3396.46	3544.12
1.5		1.1781	10.6029	29.4525	57.7269	95.4261	142.55	199.099	265.072	340.471	425.294	519.542	623.215	736.312	858.835	990.782	1132.15	1282.95	1443.17	1612.82	1791.89	1980.39	2178.31	2385.65	2602.42	2828.62	3064.24	3309.28	3563.75	3827.65	4100.97	4383.71	4675.88	4977.47	5288.49	5608.93	5938.8	6278.09	6626.81	6984.95	7352.52	7729.51	8115.93	8511.77	8917.04	9331.73	9755.85	10189.4	10632.4
2.5		1.9635	17.6715	49.0875	96.2115	159.044	237.584	331.832	441.788	567.452	708.823	865.904	1038.69	1227.19	1431.39	1651.3	1886.92	2138.25	2405.29	2688.03	2986.48	3300.64	3630.51	3976.09	4337.37	4714.36	5107.06	5515.47	5939.59	6379.41	6834.94	7306.18	7793.13	8295.79	8814.15	9348.22	9898	10463.5	11044.7	11641.6	12254.2	12882.5	13526.6	14186.3	14861.7	15552.9	16259.7	16982.3	17720.6
3.5		2.7489	24.7401	68.7225	134.696	222.661	332.617	464.564	618.502	794.432	992.353	1212.26	1454.17	1718.06	2003.95	2311.82	2641.69	2993.55	3367.4	3763.24	4181.08	4620.9	5082.72	5566.52	6072.32	6600.11	7149.89	7721.66	8315.42	8931.18	9568.92	10228.7	10910.4	11614.1	12339.8	13087.5	13857.2	14648.9	15462.6	16298.2	17155.9	18035.5	18937.2	19860.8	20806.4	21774	22763.6	23775.2	24808.8
4.5		3.5343	31.8087	88.3575	173.181	286.278	427.65	597.297	795.217	1021.41	1275.88	1558.63	1869.64	2208.94	2576.5	2972.35	3396.46	3848.85	4329.52	4838.46	5375.67	5941.16	6534.92	7156.96	7807.27	8485.85	9192.71	9927.85	10691.3	11482.9	12302.9	13151.1	14027.6	14932.4	15865.5	16826.8	17816.4	18834.3	19880.4	20954.9	22057.6	23188.5	24347.8	25535.3	26751.1	27995.2	29267.5	30568.2	31897.1
5.5		4.3197	38.8773	107.993	211.665	349.896	522.684	730.029	971.933	1248.39	1559.41	1904.99	2285.12	2699.81	3149.06	3632.87	4151.23	4704.15	5291.63	5913.67	6570.26	7261.42	7987.13	8747.39	9542.22	10371.6	11235.5	12134	13067.1	14034.7	15036.9	16073.6	17144.9	18250.7	19391.1	20566.1	21775.6	23019.7	24298.3	25611.5	26959.2	28341.6	29758.4	31209.8	32695.8	34216.3	35771.4	37361.1	38985.3
6.5		5.1051	45.9459	127.627	250.15	413.513	617.717	862.762	1148.65	1475.37	1842.94	2251.35	2700.6	3190.69	3721.62	4293.39	4906	5559.45	6253.75	6988.88	7764.86	8581.67	9439.33	10337.8	11277.2	12257.3	13278.4	14340.2	15442.9	16586.5	17770.9	18996.1	20262.1	21569	22916.8	24305.4	25734.8	27205.1	28716.2	30268.1	31860.9	33494.6	35169	36884.3	38640.5	40437.5	42275.3	44154	46073.5
7.5		5.8905	53.0145	147.262	288.635	477.131	712.751	995.495	1325.36	1702.35	2126.47	2597.71	3116.07	3681.56	4294.17	4953.91	5660.77	6414.75	7215.86	8064.09	8959.45	9901.93	10891.5	11928.3	13012.1	14143.1	15321.2	16546.4	17818.8	19138.2	20504.8	21918.6	23379.4	24887.4	26442.5	28044.7	29694	31390.5	33134.1	34924.8	36762.6	38647.6	40579.7	42558.9	44585.2	46658.7	48779.2	50946.9	53161.8
8.5		6.6759	60.0831	166.898	327.119	540.748	807.784	1128.23	1502.08	1929.34	2410	2944.07	3531.55	4172.44	4866.73	5614.43	6415.54	7270.06	8177.98	9139.31	10154	11222.2	12343.7	13518.7	14747.1	16028.8	17364	18752.6	20194.6	21690	23238.8	24841	26496.6	28205.7	29968.1	31784	33653.2	35575.9	37551.9	39581.4	41664.3	43800.6	45990.3	48233.4	50529.9	52879.8	55283.1	57739.9	60250
9.5		7.4613	67.1517	186.532	365.604	604.365	902.817	1260.96	1678.79	2156.32	2693.53	3290.43	3947.03	4663.31	5439.29	6274.95	7170.31	8125.36	9140.09	10214.5	11348.6	12542.4	13795.9	15109.1	16482	17914.6	19406.8	20958.8	22570.4	24241.8	25972.8	27763.5	29613.9	31524	33493.8	35523.2	37612.4	39761.3	41969.8	44238	46566	48953.6	51400.9	53907.9	56474.6	59101	61787	64532.8	67338.2
10.5		8.2467	74.2203	206.168	404.088	667.983	997.851	1393.69	1855.51	2383.3	2977.06	3636.79	4362.5	5154.19	6011.84	6935.47	7925.08	8980.66	10102.2	11289.7	12543.2	13862.7	15248.1	16699.6	18217	19800.3	21449.7	23165	24946.3	26793.5	28706.8	30686	32731.2	34842.3	37019.4	39262.5	41571.6	43946.7	46387.7	48894.7	51467.7	54106.6	56811.5	59582.4	62419.3	65322.1	68290.9	71325.7	74426.5
11.5		9.0321	81.2889	225.803	442.573	731.6	1092.88	1526.42	2032.22	2610.28	3260.59	3983.16	4777.98	5645.06	6584.4	7596	8679.85	9835.96	11064.3	12364.9	13737.8	15183	16700.4	18290	19951.9	21686.1	23492.5	25371.2	27322.1	29345.3	31440.7	33608.4	35848.4	38160.6	40545.1	43001.8	45530.8	48132.1	50805.6	53551.3	56369.3	59259.6	62222.1	65256.9	68364	71543.3	74794.8	78118.6	81514.7
12.5		9.8175	88.3575	245.437	481.058	795.217	1187.92	1659.16	2208.94	2837.26	3544.12	4329.52	5193.46	6135.94	7156.96	8256.52	9434.62	10691.3	12026.4	13440.2	14932.4	16503.2	18152.6	19880.4	21686.9	23571.8	25535.3	27577.4	29697.9	31897.1	34174.7	36530.9	38965.7	41478.9	44070.8	46741.1	49490	52317.5	55223.4	58208	61271	64412.6	67632.8	70931.4	74308.7	77764.4	81298.7	84911.6	88602.9
13.5		10.6029	95.4261	265.072	519.542	858.835	1282.95	1791.89	2385.65	3064.24	3827.65	4675.88	5608.93	6626.81	7729.51	8917.04	10189.4	11546.6	12988.6	14515.4	16127	17823.5	19604.8	21470.9	23421.8	25457.6	27578.1	29783.5	32073.8	34448.8	36908.7	39453.4	42082.9	44797.3	47596.4	50480.4	53449.2	56502.9	59641.3	62864.6	66172.7	69565.6	73043.4	76606	80253.4	83985.6	87802.6	91704.5	95691.2
14.5		11.3883	102.495	284.707	558.027	922.452	1377.98	1924.62	2562.37	3291.22	4111.18	5022.24	6024.41	7117.69	8302.07	9577.56	10944.2	12401.9	13950.7	15590.6	17321.6	19143.7	21057	23061.3	25156.8	27343.3	29621	31989.7	34449.6	37000.6	39642.7	42375.9	45200.2	48115.6	51122.1	54219.7	57408.4	60688.3	64059.2	67521.2	71074.4	74718.6	78454	82280.5	86198	90206.7	94306.5	98497.4	102779
15.5		12.1737	109.563	304.342	596.511	986.07	1473.02	2057.36	2739.08	3518.2	4394.71	5368.6	6439.89	7608.56	8874.63	10238.1	11698.9	13257.2	14912.8	16665.8	18516.2	20464	22509.2	24651.7	26891.7	29229.1	31663.8	34195.9	36825.4	39552.4	42376.6	45298.3	48317.4	51433.9	54647.7	57959	61367.6	64873.6	68477.1	72177.9	75976.1	79871.6	83864.6	87955	92142.7	96427.9	100810	105290	109868
16.5		12.9591	116.632	323.978	634.996	1049.69	1568.05	2190.09	2915.8	3745.18	4678.24	5714.96	6855.36	8099.44	9447.18	10898.6	12453.7	14112.5	15874.9	17741	19710.8	21784.2	23961.4	26242.2	28626.7	31114.8	33706.6	36402.1	39201.3	42104.1	45110.6	48220.8	51434.7	54752.2	58173.4	61698.3	65326.8	69059	72894.9	76834.5	80877.7	85024.7	89275.2	93629.5	98087.4	102649	107314	112083	116956
17.5		13.7445	123.701	343.612	673.481	1113.3	1663.08	2322.82	3092.51	3972.16	4961.76	6061.32	7270.84	8590.31	10019.7	11559.1	13208.5	14967.8	16837	18816.2	20905.4	23104.5	25413.6	27832.6	30361.6	33000.5	35749.4	38608.3	41577.1	44655.9	47844.6	51143.3	54551.9	58070.5	61699.1	65437.6	69286	73244.4	77312.8	81491.1	85779.4	90177.7	94685.9	99304	104032	108870	113818	118876	124044
18.5		14.5299	130.769	363.248	711.965	1176.92	1758.12	2455.55	3269.23	4199.14	5245.29	6407.69	7686.32	9081.19	10592.3	12219.6	13963.2	15823.1	17799.1	19891.4	22100	24424.8	26865.8	29423	32096.5	34886.3	37792.3	40814.5	43952.9	47207.6	50578.6	54065.8	57669.2	61388.8	65224.7	69176.9	73245.2	77429.8	81730.7	86147.8	90681.1	95330.7	100096	104979	109977	115091	120322	125669	131132
19.5		15.3153	137.838	382.883	750.45	1240.54	1853.15	2588.29	3445.94	4426.12	5528.82	6754.05	8101.79	9572.06	11164.9	12880.2	14718	16678.4	18761.2	20966.6	23294.6	25745	28318	31013.5	33831.5	36772	39835.1	43020.7	46328.8	49759.4	53312.6	56988.2	60786.4	64707.1	68750.4	72916.1	77204.4	81615.2	86148.6	90804.4	95582.8	100484	105507	110653	115922	121312	126826	132462	138221
20.5		16.1007	144.906	402.518	788.934	1304.16	1948.18	2721.02	3622.66	4653.1	5812.35	7100.41	8517.27	10062.9	11737.4	13540.7	15472.8	17533.7	19723.4	22041.9	24489.2	27065.3	29770.2	32603.9	35566.4	38657.8	41877.9	45226.9	48704.6	52311.2	56046.5	59910.7	63903.7	68025.5	72276	76655.4	81163.6	85800.6	90566.4	95461.1	100484	105637	110918	116328	121866	127534	133330	139255	145309
21.5		16.8861	151.975	422.152	827.419	1367.77	2043.22	2853.75	3799.37	4880.08	6095.88	7446.77	8932.75	10553.8	12310	14201.2	16227.5	18389	20685.5	23117.1	25683.8	28385.5	31222.4	34194.4	37301.4	40543.5	43920.7	47433.1	51080.5	54862.9	58780.5	62833.2	67020.9	71343.8	75801.7	80394.7	85122.8	89986	94984.3	100118	105386	110790	116328	122002	127811	133755	139834	146048	152397
22.5		17.6715	159.043	441.787	865.903	1431.39	2138.25	2986.48	3976.09	5107.06	6379.41	7793.13	9348.22	11044.7	12882.5	14861.7	16982.3	19244.3	21647.6	24192.3	26878.4	29705.8	32674.6	35784.8	39036.3	42429.3	45963.6	49639.2	53456.3	57414.7	61514.5	65755.7	70138.2	74662.1	79327.4	84134	89082	94171.4	99402.2	104774	110288	115943	121739	127677	133756	139976	146338	152841	159485
23.5		18.4569	166.112	461.423	904.388	1495.01	2233.28	3119.22	4152.8	5334.04	6662.94	8139.49	9763.7	11535.6	13455.1	15522.3	17737.1	20099.6	22609.7	25267.5	28072.9	31026	34126.8	37375.2	40771.3	44315	48006.4	51845.4	55832.1	59966.5	64248.5	68678.1	73255.4	77980.4	82853	87873.3	93041.2	98356.8	103820	109431	115190	121096	127150	133351	139700	146197	152842	159634	166574
24.5		19.2423	173.181	481.058	942.873	1558.63	2328.32	3251.95	4329.52	5561.02	6946.47	8485.85	10179.2	12026.4	14027.6	16182.8	18491.9	20954.9	23571.8	26342.7	29267.5	32346.3	35579	38965.7	42506.2	46200.8	50049.2	54051.6	58208	62518.2	66982.4	71600.6	76372.7	81298.7	86378.7	91612.6	97000.4	102542	108238	114088	120091	126249	132560	139026	145645	152418	159345	166427	173662
25.5		20.0277	180.249	500.692	981.357	1622.24	2423.35	3384.68	4506.23	5788.01	7230	8832.22	10594.7	12517.3	14600.2	16843.3	19246.6	21810.2	24533.9	27417.9	30462.1	33666.6	37031.2	40556.1	44241.2	48086.5	52092	56257.8	60583.8	65070	69716.4	74523.1	79489.9	84617	89904.3	95351.9	100960	106728	112656	118744	124993	131402	137971	144700	151590	158639	165849	173220	180750
26.5		20.8131	187.318	520.327	1019.84	1685.86	2518.39	3517.41	4682.95	6014.99	7513.53	9178.58	11010.1	13008.2	15172.7	17503.8	20001.4	22665.5	25496	28493.1	31656.7	34986.8	38483.4	42146.5	45976.1	49972.3	54134.9	58464	62959.6	67621.8	72450.4	77445.5	82607.2	87935.3	93430	99091.2	104919	110913	117074	123401	129895	136555	143381	150375	157534	164861	172353	180013	187838
27.5		21.5985	194.387	539.963	1058.33	1749.48	2613.42	3650.15	4859.66	6241.97	7797.06	9524.94	11425.6	13499.1	15745.3	18164.3	20756.2	23520.8	26458.2	29568.3	32851.3	36307.1	39935.6	43737	47711.1	51858	56177.7	60670.2	65335.5	70173.5	75184.4	80368	85724.4	91253.7	96955.7	102830	108878	115098	121492	128058	134796	141708	148792	156049	163479	171082	178857	186805	194926
28.5		22.3839	201.455	559.597	1096.81	1813.1	2708.45	3782.88	5036.38	6468.95	8080.59	9871.3	11841.1	13989.9	16317.9	18824.9	21510.9	24376.1	27420.3	30643.6	34045.9	37627.3	41387.8	45327.4	49446	53743.7	58220.5	62876.4	67711.3	72725.3	77918.4	83290.5	88841.7	94572	100481	106570	112837	119284	125909	132714	139698	146861	154203	161724	169424	177303	185361	193598	202015
29.5		23.1693	208.524	579.232	1135.3	1876.71	2803.49	3915.61	5213.09	6695.93	8364.12	10217.7	12256.6	14480.8	16890.4	19485.4	22265.7	25231.4	28382.4	31718.8	35240.5	38947.6	42840	46917.8	51181	55629.5	60263.3	65082.6	70087.1	75277.1	80652.3	86213	91959	97890.3	104007	110309	116796	123469	130327	137371	144600	152014	159613	167398	175368	183524	191865	200391	209103
30.5		23.9547	215.592	598.867	1173.78	1940.33	2898.52	4048.34	5389.81	6922.91	8647.65	10564	12672	14971.7	17463	20145.9	23020.5	26086.7	29344.5	32794	36435.1	40267.9	44292.2	48508.3	52915.9	57515.2	62306.2	67288.8	72463	77828.8	83386.3	89135.4	95076.2	101209	107533	114048	120756	127655	134745	142027	149501	157167	165024	173073	181313	189745	198369	207184	216191
31.5		24.7401	222.661	618.502	1212.26	2003.95	2993.55	4181.08	5566.52	7149.89	8931.18	10910.4	13087.5	15462.6	18035.5	20806.4	23775.2	26942	30306.6	33869.2	37629.7	41588.1	45744.4	50098.7	54650.9	59401	64349	69494.9	74838.8	80380.6	86120.3	92057.9	98193.5	104527	111058	117788	124715	131840	139163	146684	154403	162320	170435	178747	187258	195966	204873	213977	223279
32.5		25.5255	229.73	638.138	1250.75	2067.57	3088.59	4313.81	5743.24	7376.87	9214.71	11256.7	13503	15953.4	18608.1	21466.9	24530	27797.3	31268.7	34944.4	38824.3	42908.4	47196.6	51689.1	56385.8	61286.7	66391.8	71701.1	77214.6	82932.3	88854.3	94980.4	101311	107845	114584	121527	128674	136025	143581	151341	159305	167473	175845	184422	193203	202187	211377	220770	230368
33.5		26.3109	236.798	657.772	1289.23	2131.18	3183.62	4446.54	5919.95	7603.85	9498.23	11603.1	13918.5	16444.3	19180.6	22127.5	25284.8	28652.6	32230.9	36019.6	40018.9	44228.6	48648.9	53279.6	58120.8	63172.5	68434.7	73907.3	79590.5	85484.1	91588.2	97902.9	104428	111164	118110	125266	132633	140211	147999	155997	164206	172626	181256	190096	199147	208409	217881	227563	237456
34.5		27.0963	243.867	677.407	1327.72	2194.8	3278.65	4579.27	6096.67	7830.83	9781.76	11949.5	14333.9	16935.2	19753.2	22788	26039.5	29507.9	33193	37094.8	41213.5	45548.9	50101.1	54870	59855.7	65058.2	70477.5	76113.5	81966.3	88035.9	94322.2	100825	107545	114482	121635	129005	136592	144396	152417	160654	169108	177779	186666	195771	205092	214630	224384	234356	244544
35.5		27.8817	250.935	697.043	1366.2	2258.42	3373.69	4712.01	6273.38	8057.81	10065.3	12295.8	14749.4	17426.1	20325.8	23448.5	26794.3	30363.2	34155.1	38170	42408.1	46869.1	51553.3	56460.4	61590.7	66944	72520.3	78319.7	84342.1	90587.6	97056.2	103748	110662	117800	125161	132745	140552	148582	156835	165311	174010	182932	192077	201445	211037	220851	230888	241149	251632
36.5		28.6671	258.004	716.678	1404.69	2322.04	3468.72	4844.74	6450.1	8284.79	10348.8	12642.2	15164.9	17916.9	20898.3	24109	27549.1	31218.5	35117.2	39245.3	43602.7	48189.4	53005.5	58050.9	63325.6	68829.7	74563.1	80525.9	86718	93139.4	99790.2	106670	113780	121118	128687	136484	144511	152767	161252	169967	178911	188085	197488	207120	216981	227072	237392	247942	258721
37.5		29.4525	265.072	736.312	1443.17	2385.65	3563.75	4977.47	6626.81	8511.77	10632.4	12988.6	15580.4	18407.8	21470.9	24769.6	28303.9	32073.8	36079.3	40320.5	44797.3	49509.7	54457.7	59641.3	65060.6	70715.5	76606	82732.1	89093.8	95691.2	102524	109593	116897	124437	132212	140223	148470	156952	165670	174624	183813	193238	202898	212794	222926	233293	243896	254735	265809
38.5		30.2379	272.141	755.947	1481.66	2449.27	3658.79	5110.21	6803.53	8738.75	10915.9	13334.9	15995.8	18898.7	22043.4	25430.1	29058.6	32929.1	37041.4	41395.7	45991.8	50829.9	55909.9	61231.7	66795.5	72601.2	78648.8	84938.3	91469.6	98242.9	105258	112515	120014	127755	135738	143963	152429	161138	170088	179281	188715	198391	208309	218469	228871	239514	250400	261528	272897
39.5		31.0233	279.21	775.582	1520.14	2512.89	3753.82	5242.94	6980.24	8965.73	11199.4	13681.3	16411.3	19389.6	22616	26090.6	29813.4	33784.4	38003.5	42470.9	47186.4	52150.2	57362.1	62822.2	68530.5	74486.9	80691.6	87144.4	93845.5	100795	107992	115438	123131	131073	139264	147702	156388	165323	174506	183937	193616	203544	213720	224143	234815	245736	256904	268321	279985
40.5		31.8087	286.278	795.217	1558.63	2576.5	3848.85	5375.67	7156.96	9192.71	11482.9	14027.6	16826.8	19880.4	23188.5	26751.1	30568.2	34639.7	38965.7	43546.1	48381	53470.4	58814.3	64412.6	70265.4	76372.7	82734.4	89350.6	96221.3	103346	110726	118360	126249	134392	142789	151441	160348	169509	178924	188594	198518	208697	219130	229818	240760	251957	263408	275113	287074
41.5		32.5941	293.347	814.852	1597.11	2640.12	3943.89	5508.4	7333.67	9419.69	11766.5	14374	17242.3	20371.3	23761.1	27411.6	31322.9	35495	39927.8	44621.3	49575.6	54790.7	60266.5	66003.1	72000.4	78258.4	84777.3	91556.8	98597.2	105898	113460	121283	129366	137710	146315	155181	164307	173694	183342	193250	203420	213850	224541	235492	246705	258178	269912	281906	294162
42.5		33.3795	300.415	834.488	1635.6	2703.74	4038.92	5641.14	7510.39	9646.68	12050	14720.4	17657.8	20862.2	24333.7	28072.2	32077.7	36350.3	40889.9	45696.5	50770.2	56110.9	61718.7	67593.5	73735.3	80144.2	86820.1	93763	100973	108450	116194	124205	132483	141028	149841	158920	168266	177879	187760	197907	208321	219003	229951	241167	252649	264399	276416	288699	301250
43.5		34.1649	307.484	854.122	1674.08	2767.36	4133.95	5773.87	7687.1	9873.66	12333.5	15066.7	18073.2	21353.1	24906.2	28732.7	32832.5	37205.6	41852	46771.7	51964.8	57431.2	63170.9	69183.9	75470.3	82029.9	88862.9	95969.2	103349	111002	118928	127128	135600	144347	153366	162659	172225	182065	192178	202564	213223	224156	235362	246841	258594	270620	282920	295492	308338
44.5		34.9503	314.553	873.757	1712.56	2830.97	4228.99	5906.6	7863.82	10100.6	12617.1	15413.1	18488.7	21843.9	25478.8	29393.2	33587.2	38060.9	42814.1	47847	53159.4	58751.5	64623.1	70774.4	77205.2	83915.7	90905.7	98175.4	105725	113554	121662	130050	138718	147665	156892	166398	176184	186250	196595	207220	218125	229309	240773	252516	264539	276841	289423	302285	315426
45.5		35.7357	321.621	893.393	1751.05	2894.59	4324.02	6039.33	8040.53	10327.6	12900.6	15759.4	18904.2	22334.8	26051.3	30053.7	34342	38916.2	43776.2	48922.2	54354	60071.7	66075.3	72364.8	78940.2	85801.4	92948.6	100382	108100	116105	124396	132973	141835	150983	160418	170138	180144	190436	201013	211877	223027	234462	246183	258190	270484	283062	295927	309078	322515
46.5		36.5211	328.69	913.027	1789.53	2958.21	4419.05	6172.07	8217.25	10554.6	13184.1	16105.8	19319.7	22825.7	26623.9	30714.2	35096.8	39771.5	44738.3	49997.4	55548.6	61392	67527.5	73955.2	80675.1	87687.2	94991.4	102588	110476	118657	127130	135895	144952	154302	163943	173877	184103	194621	205431	216534	227928	239615	251594	263865	276428	289284	302431	315871	329603
47.5		37.3065	335.759	932.663	1828.02	3021.83	4514.09	6304.8	8393.96	10781.6	13467.6	16452.2	19735.1	23316.6	27196.4	31374.8	35851.5	40626.8	45700.5	51072.6	56743.2	62712.2	68979.7	75545.7	82410.1	89572.9	97034.2	104794	112852	121209	129864	138817	148069	157620	167469	177616	188062	198806	209849	221190	232830	244768	257004	269539	282373	295505	308935	322664	336691
48.5		38.0919	342.827	952.298	1866.5	3085.44	4609.12	6437.53	8570.68	11008.6	13751.2	16798.5	20150.6	23807.4	27769	32035.3	36606.3	41482.1	46662.6	52147.8	57937.8	64032.5	70431.9	77136.1	84145	91458.7	99077	107000	115228	123761	132598	141740	151187	160938	170995	181356	192021	202992	214267	225847	237732	249921	262415	275214	288318	301726	315439	329457	343779
49.5		38.8773	349.896	971.932	1904.99	3149.06	4704.15	6570.26	8747.39	11235.5	14034.7	17144.9	20566.1	24298.3	28341.6	32695.8	37361.1	42337.4	47624.7	53223	59132.4	65352.7	71884.1	78726.5	85880	93344.4	101120	109206	117604	126312	135332	144662	154304	164257	174520	185095	195980	207177	218685	230504	242633	255074	267826	280888	294262	307947	321943	336250	350868
50.5		39.6627	356.964	991.567	1943.47	3212.68	4799.19	6703	8924.11	11462.5	14318.2	17491.3	20981.6	24789.2	28914.1	33356.3	38115.9	43192.7	48586.8	54298.2	60327	66673	73336.3	80317	87614.9	95230.1	103163	111413	119980	128864	138066	147585	157421	167575	178046	188834	199940	211363	223103	235160	247535	260227	273236	286563	300207	314168	328447	343043	357956
51.5		40.4481	364.033	1011.2	1981.96	3276.3	4894.22	6835.73	9100.82	11689.5	14601.8	17837.6	21397	25280.1	29486.7	34016.9	38870.6	44048	49548.9	55373.4	61521.6	67993.3	74788.5	81907.4	89349.9	97115.9	105206	113619	122356	131416	140800	150507	160539	170893	181572	192573	203899	215548	227521	239817	252437	265380	278647	292238	306152	320389	334951	349836	365044
52.5		41.2335	371.101	1030.84	2020.44	3339.91	4989.25	6968.46	9277.54	11916.5	14885.3	18184	21812.5	25770.9	30059.2	34677.4	39625.4	44903.3	50511	56448.7	62716.2	69313.5	76240.7	83497.8	91084.8	99001.6	107248	115825	124731	133968	143534	153430	163656	174212	185097	196313	207858	219733	231938	244473	257338	270533	284058	297912	312096	326611	341455	356629	372132
53.5		42.0189	378.17	1050.47	2058.93	3403.53	5084.29	7101.19	9454.25	12143.5	15168.8	18530.3	22228	26261.8	30631.8	35337.9	40380.2	45758.6	51473.2	57523.9	63910.7	70633.8	77692.9	85088.3	92819.8	100887	109291	118031	127107	136519	146268	156352	166773	177530	188623	200052	211817	223919	236356	249130	262240	275686	289468	303587	318041	332832	347959	363421	379221
54.5		42.8043	385.239	1070.11	2097.41	3467.15	5179.32	7233.93	9630.97	12370.4	15452.4	18876.7	22643.5	26752.7	31204.3	35998.4	41134.9	46613.9	52435.3	58599.1	65105.3	71954	79145.2	86678.7	94554.7	102773	111334	120237	129483	139071	149002	159275	169890	180848	192149	203791	215776	228104	240774	253787	267142	280839	294879	309261	323986	339053	354462	370214	386309
55.5		43.5897	392.307	1089.74	2135.9	3530.77	5274.35	7366.66	9807.68	12597.4	15735.9	19223.1	23059	27243.6	31776.9	36658.9	41889.7	47469.2	53397.4	59674.3	66299.9	73274.3	80597.4	88269.1	96289.6	104659	113377	122443	131859	141623	151736	162197	173008	184166	195674	207531	219736	232290	245192	258443	272043	285992	300289	314936	329930	345274	360966	377007	393397
56.5		44.3751	399.376	1109.38	2174.38	3594.38	5369.39	7499.39	9984.4	12824.4	16019.4	19569.4	23474.4	27734.4	32349.4	37319.5	42644.5	48324.5	54359.5	60749.5	67494.5	74594.5	82049.6	89859.6	98024.6	106545	115420	124650	134235	144175	154470	165120	176125	187485	199200	211270	223695	236475	249610	263100	276945	291145	305700	320610	335875	351495	367470	383800	400485
57.5		45.1605	406.444	1129.01	2212.86	3658	5464.42	7632.12	10161.1	13051.4	16302.9	19915.8	23889.9	28225.3	32922	37980	43399.2	49179.8	55321.6	61824.7	68689.1	75914.8	83501.8	91450	99759.5	108430	117462	126856	136611	146726	157204	168042	179242	190803	202725	215009	227654	240660	254028	267757	281847	296298	311111	326285	341820	357716	373974	390593	407574
58.5		45.9459	413.513	1148.65	2251.35	3721.62	5559.45	7764.86	10337.8	13278.4	16586.5	20262.1	24305.4	28716.2	33494.6	38640.5	44154	50035.1	56283.7	62899.9	69883.7	77235.1	84954	93040.4	101494	110316	119505	129062	138986	149278	159938	170965	182359	194121	206251	218748	231613	244846	258446	272413	286748	301451	316521	331959	347765	363937	380478	397386	414662
59.5		46.7313	420.582	1168.28	2289.83	3785.24	5654.49	7897.59	10514.5	13505.3	16870	20608.5	24720.9	29207.1	34067.1	39301	44908.8	50890.4	57245.8	63975.1	71078.3	78555.3	86406.2	94630.9	103229	112202	121548	131268	141362	151830	162672	173887	185477	197440	209777	222488	235572	249031	262864	277070	291650	306604	321932	337634	353709	370159	386982	404179	421750
60.5		47.5167	427.65	1187.92	2328.32	3848.85	5749.52	8030.32	10691.3	13732.3	17153.5	20954.9	25136.3	29697.9	34639.7	39961.5	45663.5	51745.7	58208	65050.4	72272.9	79875.6	87858.4	96221.3	104964	114088	123591	133474	143738	154382	165406	176810	188594	200758	213302	226227	239532	253216	267281	281727	296552	311757	327343	343308	359654	376380	393486	410972	428838
61.5		48.3021	434.719	1207.55	2366.8	3912.47	5844.55	8163.05	10868	13959.3	17437.1	21301.2	25551.8	30188.8	35212.2	40622.1	46418.3	52601	59170.1	66125.6	73467.5	81195.8	89310.6	97811.8	106699	115973	125634	135681	146114	156934	168140	179732	191711	204076	216828	229966	243491	257402	271699	286383	301453	316910	332753	348983	365599	382601	399990	417765	435926
62.5		49.0875	441.787	1227.19	2405.29	3976.09	5939.59	8295.79	11044.7	14186.3	17720.6	21647.6	25967.3	30679.7	35784.8	41282.6	47173.1	53456.3	60132.2	67200.8	74662.1	82516.1	90762.8	99402.2	108434	117859	127677	137887	148490	159485	170874	182655	194828	207395	220354	233706	247450	261587	276117	291040	306355	322063	338164	354657	371543	388822	406494	424558	443015
63.5		49.8729	448.856	1246.82	2443.77	4039.7	6034.62	8428.52	11221.4	14413.3	18004.1	21993.9	26382.8	31170.6	36357.3	41943.1	47927.9	54311.6	61094.3	68276	75856.7	83836.3	92215	100993	110169	119745	129719	140093	150866	162037	173608	185577	197946	210713	223879	237445	251409	265773	280535	295696	311257	327216	343574	360332	377488	395043	412997	431351	450103
64.5		50.6583	455.925	1266.46	2482.26	4103.32	6129.65	8561.25	11398.1	14640.2	18287.6	22340.3	26798.2	31661.4	36929.9	42603.6	48682.6	55166.9	62056.4	69351.2	77051.3	85156.6	93667.2	102583	111904	121631	131762	142299	153241	164589	176342	188500	201063	214031	227405	241184	255368	269958	284953	300353	316158	332369	348985	366006	383433	401264	419501	438144	457191
65.5		51.4437	462.993	1286.09	2520.74	4166.94	6224.69	8693.99	11574.8	14867.2	18571.2	22686.7	27213.7	32152.3	37502.5	43264.2	49437.4	56022.2	63018.5	70426.4	78245.9	86476.9	95119.4	104173	113639	123516	133805	144505	155617	167141	179076	191422	204180	217350	230931	244923	259328	274143	289371	305010	321060	337522	354396	371681	389377	407486	426005	444937	464279
66.5		52.2291	470.062	1305.73	2559.23	4230.56	6319.72	8826.72	11751.5	15094.2	18854.7	23033	27629.2	32643.2	38075	43924.7	50192.2	56877.5	63980.6	71501.6	79440.5	87797.1	96571.6	105764	115374	125402	135848	146712	157993	169692	181809	194344	207297	220668	234456	248663	263287	278329	293789	309666	325962	342675	359806	377355	395322	413707	432509	451729	471368
67.5		53.0145	477.13	1325.36	2597.71	4294.17	6414.75	8959.45	11928.3	15321.2	19138.2	23379.4	28044.7	33134.1	38647.6	44585.2	50946.9	57732.8	64942.8	72576.9	80635.1	89117.4	98023.8	107354	117109	127288	137891	148918	160369	172244	184543	197267	210415	223986	237982	252402	267246	282514	298207	314323	330863	347828	365217	383030	401267	419928	439013	458522	478456
68.5		53.7999	484.199	1345	2636.2	4357.79	6509.79	9092.18	12105	15548.2	19421.8	23725.8	28460.1	33624.9	39220.1	45245.7	51701.7	58588.1	65904.9	73652.1	81829.6	90437.6	99476	108945	118844	129174	139934	151124	162745	174796	187277	200189	213532	227305	241508	256141	271205	286700	302624	318980	335765	352981	370628	388704	407211	426149	445517	465315	485544
69.5		54.5853	491.268	1364.63	2674.68	4421.41	6604.82	9224.92	12281.7	15775.2	19705.3	24072.1	28875.6	34115.8	39792.7	45906.2	52456.5	59443.4	66867	74727.3	83024.2	91757.9	100928	110535	120579	131059	141976	153330	165121	177348	190011	203112	216649	230623	245033	259881	275164	290885	307042	323636	340667	358134	376038	394379	413156	432370	452021	472108	492632
70.5		55.3707	498.336	1384.27	2713.16	4485.03	6699.85	9357.65	12458.4	16002.1	19988.8	24418.5	29291.1	34606.7	40365.2	46566.8	53211.2	60298.7	67829.1	75802.5	84218.8	93078.1	102380	112126	122314	132945	144019	155536	167496	179899	192745	206034	219766	233941	248559	263620	279124	295070	311460	328293	345569	363287	381449	400053	419101	438591	458525	478901	499721
71.5		56.1561	505.405	1403.9	2751.65	4548.64	6794.89	9490.38	12635.1	16229.1	20272.4	24764.8	29706.6	35097.6	40937.8	47227.3	53966	61154	68791.2	76877.7	85413.4	94398.4	103833	113716	124049	134831	146062	157742	169872	182451	195479	208957	222884	237260	252085	267359	283083	299256	315878	332950	350470	368440	386859	405728	425046	444812	465029	485694	506809
72.5		56.9415	512.474	1423.54	2790.13	4612.26	6889.92	9623.11	12811.8	16456.1	20555.9	25111.2	30122.1	35588.4	41510.4	47887.8	54720.8	62009.3	69753.3	77952.9	86608	95718.7	105285	115307	125784	136717	148105	159949	172248	185003	198213	211879	226001	240578	255610	271098	287042	303441	320296	337606	355372	373593	392270	411402	430990	451034	471533	492487	513897
73.5		57.7269	519.542	1443.17	2828.62	4675.88	6984.95	9755.85	12988.6	16683.1	20839.4	25457.6	30537.5	36079.3	42082.9	48548.3	55475.6	62864.6	70715.5	79028.1	87802.6	97038.9	106737	116897	127519	138602	150148	162155	174624	187555	200947	214802	229118	243896	259136	274838	291001	307627	324714	342263	360274	378746	397681	417077	436935	457255	478036	499280	520985
74.5		58.5123	526.611	1462.81	2867.1	4739.5	7079.99	9888.58	13165.3	16910.1	21122.9	25803.9	30953	36570.2	42655.5	49208.8	56230.3	63719.9	71677.6	80103.3	88997.2	98359.2	108189	118487	129254	140488	152190	164361	177000	190106	203681	217724	232235	247214	262662	278577	294961	311812	329132	346919	365175	383899	403091	422751	442880	463476	484540	506073	528074
75.5		59.2977	533.679	1482.44	2905.59	4803.11	7175.02	10021.3	13342	17137	21406.5	26150.3	31368.5	37061.1	43228	49869.4	56985.1	64575.2	72639.7	81178.6	90191.8	99679.4	109641	120078	130989	142374	154233	166567	179376	192658	206415	220647	235353	250533	266187	282316	298920	315997	333550	351576	370077	389052	408502	428426	448824	469697	491044	512866	535162
76.5		60.0831	540.748	1502.08	2944.07	4866.73	7270.06	10154	13518.7	17364	21690	26496.6	31784	37551.9	43800.6	50529.9	57739.9	65430.5	73601.8	82253.8	91386.4	101000	111094	121668	132724	144260	156276	168773	181751	195210	209149	223569	238470	253851	269713	286056	302879	320183	337967	356233	374979	394205	413912	434100	454769	475918	497548	519659	542250
77.5		60.8685	547.817	1521.71	2982.56	4930.35	7365.09	10286.8	13695.4	17591	21973.5	26843	32199.4	38042.8	44373.1	51190.4	58494.6	66285.8	74563.9	83329	92581	102320	112546	123259	134459	146145	158319	170980	184127	197762	211883	226492	241587	257169	273239	289795	306838	324368	342385	360889	379880	399358	419323	439775	460714	482139	504052	526452	549338
78.5		61.6539	554.885	1541.35	3021.04	4993.97	7460.12	10419.5	13872.1	17818	22257.1	27189.4	32614.9	38533.7	44945.7	51850.9	59249.4	67141.1	75526	84404.2	93775.6	103640	113998	124849	136193	148031	160362	173186	186503	200314	214617	229414	244704	260488	276764	293534	310797	328554	346803	365546	384782	404511	424734	445449	466658	488361	510556	533245	556426
79.5		62.4393	561.954	1560.98	3059.53	5057.58	7555.16	10552.2	14048.8	18045	22540.6	27535.7	33030.4	39024.6	45518.2	52511.5	60004.2	67996.4	76488.1	85479.4	94970.2	104960	115450	126440	137928	149917	162405	175392	188879	202865	217351	232337	247822	263806	280290	297274	314757	332739	351221	370203	389684	409664	430144	451124	472603	494582	517060	540038	563515
80.5		63.2247	569.022	1580.62	3098.01	5121.2	7650.19	10685	14225.6	18271.9	22824.1	27882.1	33445.9	39515.4	46090.8	53172	60758.9	68851.7	77450.3	86554.6	96164.8	106281	116902	128030	139663	151803	164447	177598	191255	205417	220085	235259	250939	267124	283816	301013	318716	336924	355639	374859	394585	414817	435555	456798	478548	500803	523564	546830	570603
81.5		64.0101	576.091	1600.25	3136.49	5184.82	7745.22	10817.7	14402.3	18498.9	23107.6	28228.5	33861.3	40006.3	46663.4	53832.5	61513.7	69707	78412.4	87629.8	97359.4	107601	118355	129620	141398	153688	166490	179804	193631	207969	222819	238182	254056	270443	287341	304752	322675	341110	360057	379516	399487	419970	440966	462473	484492	507024	530068	553623	577691
82.5		64.7955	583.159	1619.89	3174.98	5248.44	7840.26	10950.4	14579	18725.9	23391.2	28574.8	34276.8	40497.2	47235.9	54493	62268.5	70562.3	79374.5	88705	98554	108921	119807	131211	143133	155574	168533	182011	196006	210521	225553	241104	257173	273761	290867	308491	326634	345295	364475	384173	404389	425123	446376	468147	490437	513245	536572	560416	584779
83.5		65.5809	590.228	1639.52	3213.46	5312.05	7935.29	11083.2	14755.7	18952.9	23674.7	28921.2	34692.3	40988.1	47808.5	55153.5	63023.2	71417.6	80336.6	89780.3	99748.5	110241	121259	132801	144868	157460	170576	184217	198382	213072	228287	244027	260291	277079	294393	312231	330593	349481	368893	388829	409290	430276	451787	473822	496382	519466	543075	567209	591868
84.5		66.3663	597.297	1659.16	3251.95	5375.67	8030.32	11215.9	14932.4	19179.9	23958.2	29267.5	35107.8	41478.9	48381	55814.1	63778	72272.9	81298.7	90855.5	100943	111562	122711	134392	146603	159345	172619	186423	200758	215624	231021	246949	263408	280398	297918	315970	334553	353666	373310	393486	414192	435429	457197	479497	502327	525687	549579	574002	598956
85.5		67.1517	604.365	1678.79	3290.43	5439.29	8125.36	11348.6	15109.1	19406.8	24241.8	29613.9	35523.2	41969.8	48953.6	56474.6	64532.8	73128.2	82260.8	91930.7	102138	112882	124163	135982	148338	161231	174662	188629	203134	218176	233755	249871	266525	283716	301444	319709	338512	357851	377728	398142	419094	440582	462608	485171	508271	531909	556083	580795	606044
86.5		67.9371	611.434	1698.43	3328.92	5502.91	8220.39	11481.4	15285.8	19633.8	24525.3	29960.3	35938.7	42460.7	49526.1	57135.1	65287.6	73983.5	83222.9	93005.9	103332	114202	125616	137573	150073	163117	176704	190835	205510	220728	236489	252794	269642	287034	304970	323449	342471	362037	382146	402799	423995	445735	468019	490846	514216	538130	562587	587588	613132
87.5		68.7225	618.502	1718.06	3367.4	5566.52	8315.42	11614.1	15462.6	19860.8	24808.8	30306.6	36354.2	42951.6	50098.7	57795.6	66042.3	74838.8	84185.1	94081.1	104527	115523	127068	139163	151808	165003	178747	193042	207886	223279	239223	255716	272760	290353	308495	327188	346430	366222	386564	407456	428897	450888	473429	496520	520161	544351	569091	594381	620221
88.5		69.5079	625.571	1737.7	3405.89	5630.14	8410.46	11746.8	15639.3	20087.8	25092.4	30653	36769.7	43442.4	50671.3	58456.1	66797.1	75694.1	85147.2	95156.3	105722	116843	128520	140753	153543	166888	180790	195248	210261	225831	241957	258639	275877	293671	312021	330927	350389	370408	390982	412112	433799	456041	478840	502195	526105	550572	575595	601174	627309
89.5		70.2933	632.64	1757.33	3444.37	5693.76	8505.49	11879.6	15816	20314.8	25375.9	30999.3	37185.2	43933.3	51243.8	59116.7	67551.9	76549.4	86109.3	96231.5	106916	118163	129972	142344	155278	168774	182833	197454	212637	228383	244691	261561	278994	296989	315547	334666	354349	374593	395400	416769	438700	461194	484251	507869	532050	556793	582099	607967	634397
90.5		71.0787	639.708	1776.97	3482.86	5757.37	8600.52	12012.3	15992.7	20541.7	25659.4	31345.7	37600.6	44424.2	51816.4	59777.2	68306.6	77404.7	87071.4	97306.7	108111	119483	131425	143934	157013	170660	184876	199660	215013	230935	247425	264484	282111	300308	319072	338406	358308	378778	399818	421426	443602	466347	489661	513544	537995	563014	588603	614760	641485
91.5		71.8641	646.777	1796.6	3521.34	5820.99	8695.56	12145	16169.4	20768.7	25942.9	31692.1	38016.1	44915.1	52388.9	60437.7	69061.4	78260	88033.5	98382	109305	120804	132877	145525	158748	172546	186919	201866	217389	233486	250159	267406	285229	303626	322598	342145	362267	382964	404236	426082	448504	471500	495072	519218	543939	569236	595107	621553	648574
92.5		72.6495	653.846	1816.24	3559.83	5884.61	8790.59	12277.8	16346.1	20995.7	26226.5	32038.4	38431.6	45405.9	52961.5	61098.2	69816.2	79115.3	88995.6	99457.2	110500	122124	134329	147115	160483	174431	188961	204072	219765	236038	252893	270329	288346	306944	326124	345884	366226	387149	408653	430739	453406	476653	500482	524893	549884	575457	601611	628346	655662
93.5		73.4349	660.914	1835.87	3598.31	5948.23	8885.62	12410.5	16522.9	21222.7	26510	32384.8	38847.1	45896.8	53534	61758.8	70570.9	79970.6	89957.8	100532	111694	123444	135781	148706	162218	176317	191004	206279	222141	238590	255627	273251	291463	310262	329649	349624	370185	391335	413071	435396	458307	481806	505893	530567	555829	581678	608114	635138	662750
94.5		74.2203	667.983	1855.51	3636.79	6011.84	8980.66	12543.2	16699.6	21449.7	26793.5	32731.2	39262.5	46387.7	54106.6	62419.3	71325.7	80825.9	90919.9	101608	112889	124764	137233	150296	163953	178203	193047	208485	224516	241142	258361	276174	294580	313581	333175	353363	374145	395520	417489	440052	463209	486959	511304	536242	561773	587899	614618	641931	669838
95.5		75.0057	675.051	1875.14	3675.28	6075.46	9075.69	12676	16876.3	21676.6	27077.1	33077.5	39678	46878.6	54679.2	63079.8	72080.5	81681.2	91882	102683	114084	126085	138686	151887	165688	180089	195090	210691	226892	243694	261095	279096	297698	316899	336701	357102	378104	399705	421907	444709	468111	492112	516714	541916	567718	594120	621122	648724	676926
96.5		75.7911	682.12	1894.78	3713.76	6139.08	9170.72	12808.7	17053	21903.6	27360.6	33423.9	40093.5	47369.4	55251.7	63740.3	72835.2	82536.5	92844.1	103758	115278	127405	140138	153477	167423	181974	197133	212897	229268	246245	263829	282019	300815	320217	340226	360841	382063	403891	426325	449365	473012	497265	522125	547591	573663	600341	627626	655517	684015
97.5		76.5765	689.188	1914.41	3752.25	6202.7	9265.76	12941.4	17229.7	22130.6	27644.1	33770.2	40509	47860.3	55824.3	64400.8	73590	83391.8	93806.2	104833	116473	128725	141590	155067	169157	183860	199175	215103	231644	248797	266563	284941	303932	323536	343752	364581	386022	408076	430743	454022	477914	502418	527536	553265	579608	606562	634130	662310	691103
98.5		77.3619	696.257	1934.05	3790.73	6266.31	9360.79	13074.2	17406.4	22357.6	27927.6	34116.6	40924.4	48351.2	56396.8	65061.4	74344.8	84247.1	94768.3	105908	117667	130045	143042	156658	170892	185746	201218	217310	234020	251349	269297	287864	307049	326854	347278	368320	389981	412262	435161	458679	482816	507571	532946	558940	585552	612784	640634	669103	698191
99.5		78.1473	703.326	1953.68	3829.22	6329.93	9455.82	13206.9	17583.1	22584.6	28211.2	34463	41339.9	48842.1	56969.4	65721.9	75099.6	85102.4	95730.4	106984	118862	131366	144494	158248	172627	187632	203261	219516	236396	253901	272031	290786	310167	330172	350803	372059	393941	416447	439579	463335	487717	512724	538357	564614	591497	619005	647138	675896	705279
100.5		78.9327	710.394	1973.32	3867.7	6393.55	9550.86	13339.6	17759.9	22811.6	28494.7	34809.3	41755.4	49332.9	57541.9	66382.4	75854.3	85957.7	96692.6	108059	120057	132686	145947	159839	174362	189517	205304	221722	238771	256452	274765	293709	313284	333491	354329	375799	397900	420632	443996	467992	492619	517877	543767	570289	597442	625226	653642	682689	712368
										0	0	0	0	0	0	0	0	0	0	0	0	0	0	0	0	0	0	0	0	0	0	0	0	0	0	0	0	0	0	0	0	0	0	0	0	0	0	0	0
[truncated: 53 more columns]

## Sheet: RODS-N° of atoms per particle
	Width	0.5	1.5	2.5	3.5	4.5	5.5	6.5	7.5	8.5	9.5	10.5	11.5	12.5	13.5	14.5	15.5	16.5	17.5	18.5	19.5	20.5	21.5	22.5	23.5	24.5	25.5	26.5	27.5	28.5	29.5	30.5	31.5	32.5	33.5	34.5	35.5	36.5	37.5	38.5	39.5	40.5	41.5	42.5	43.5	44.5	45.5	46.5	47.5
Length
0.5		31.072	279.648	776.799	1522.53	2516.83	3759.71	5251.16	6991.19	8979.8	11217	13702.7	16437.1	19420	22651.5	26131.5	29860.2	33837.4	38063.2	42537.5	47260.5	52232	57452.1	62920.7	68638	74603.8	80818.2	87281.2	93992.7	100953	108162	115619	123325	131279	139482	147934	156634	165583	174780	184226	193920	203863	214055	224495	235184	246121	257307	268741	280425
1.5		93.2159	838.943	2330.4	4567.58	7550.49	11279.1	15753.5	20973.6	26939.4	33650.9	41108.2	49311.2	58259.9	67954.4	78394.6	89580.5	101512	114189	127613	141781	156696	172356	188762	205914	223811	242455	261843	281978	302858	324485	346856	369974	393837	418446	443801	469901	496748	524339	552677	581760	611590	642164	673485	705551	738363	771921	806224	841274
2.5		155.36	1398.24	3884	7612.63	12584.1	18798.5	26255.8	34956	44899	56084.9	68513.7	82185.4	97099.9	113257	130658	149301	169187	190316	212688	236302	261160	287260	314604	343190	373019	404091	436406	469964	504764	540808	578094	616623	656395	697410	739668	783169	827913	873899	921128	969601	1.01932e+06	1.07027e+06	1.12247e+06	1.17592e+06	1.23061e+06	1.28653e+06	1.34371e+06	1.40212e+06
3.5		217.504	1957.53	5437.59	10657.7	17617.8	26318	36758.1	48938.3	62858.6	78518.9	95919.2	115059	135940	158560	182921	209021	236862	266442	297763	330823	365624	402164	440445	480466	522227	565727	610968	657949	706670	757131	809332	863272	918953	976374	1.03554e+06	1.09644e+06	1.15908e+06	1.22346e+06	1.28958e+06	1.35744e+06	1.42704e+06	1.49838e+06	1.57146e+06	1.64629e+06	1.72285e+06	1.80115e+06	1.88119e+06	1.96297e+06
4.5		279.648	2516.83	6991.19	13702.7	22651.5	33837.4	47260.5	62920.7	80818.2	100953	123325	147934	174780	203863	235184	268741	304536	342568	382838	425344	470088	517069	566287	617742	671434	727364	785530	845934	908575	973454	1.04057e+06	1.10992e+06	1.18151e+06	1.25534e+06	1.3314e+06	1.4097e+06	1.49024e+06	1.57302e+06	1.65803e+06	1.74528e+06	1.83477e+06	1.92649e+06	2.02045e+06	2.11665e+06	2.21509e+06	2.31576e+06	2.41867e+06	2.52382e+06
5.5		341.792	3076.12	8544.79	16747.8	27685.1	41356.8	57762.8	76903.1	98777.8	123387	150730	180808	213620	249166	287447	328462	372211	418695	467913	519865	574552	631973	692128	755018	820642	889000	960093	1.03392e+06	1.11048e+06	1.18978e+06	1.27181e+06	1.35657e+06	1.44407e+06	1.5343e+06	1.62727e+06	1.72297e+06	1.82141e+06	1.92258e+06	2.02648e+06	2.13312e+06	2.24249e+06	2.3546e+06	2.46944e+06	2.58702e+06	2.70733e+06	2.83038e+06	2.95616e+06	3.08467e+06
6.5		403.936	3635.42	10098.4	19792.8	32718.8	48876.2	68265.1	90885.5	116737	145821	178136	213682	252460	294469	339710	388182	439886	494821	552988	614386	679016	746877	817970	892294	969849	1.05064e+06	1.13466e+06	1.22191e+06	1.31239e+06	1.4061e+06	1.50304e+06	1.60322e+06	1.70663e+06	1.81327e+06	1.92314e+06	2.03624e+06	2.15257e+06	2.27214e+06	2.39493e+06	2.52096e+06	2.65022e+06	2.78271e+06	2.91843e+06	3.05739e+06	3.19957e+06	3.34499e+06	3.49364e+06	3.64552e+06
7.5		466.08	4194.72	11652	22837.9	37752.4	56395.6	78767.4	104868	134697	168255	205541	246556	291300	339772	391973	447902	507561	570947	638063	708907	783480	861781	943811	1.02957e+06	1.11906e+06	1.21227e+06	1.30922e+06	1.40989e+06	1.51429e+06	1.62242e+06	1.73428e+06	1.84987e+06	1.96919e+06	2.09223e+06	2.219e+06	2.34951e+06	2.48374e+06	2.6217e+06	2.76339e+06	2.9088e+06	3.05795e+06	3.21082e+06	3.36742e+06	3.52776e+06	3.69182e+06	3.8596e+06	4.03112e+06	4.20637e+06
8.5		528.223	4754.01	13205.6	25882.9	42786.1	63915	89269.8	118850	152657	190689	232947	279430	330140	385075	444236	507623	575235	647074	723138	803428	887944	976685	1.06965e+06	1.16685e+06	1.26826e+06	1.37391e+06	1.48378e+06	1.59788e+06	1.7162e+06	1.83875e+06	1.96552e+06	2.09652e+06	2.23174e+06	2.3712e+06	2.51487e+06	2.66277e+06	2.8149e+06	2.97126e+06	3.13184e+06	3.29664e+06	3.46567e+06	3.63893e+06	3.81641e+06	3.99812e+06	4.18406e+06	4.37422e+06	4.5686e+06	4.76722e+06
9.5		590.367	5313.31	14759.2	28928	47819.8	71434.5	99772.1	132833	170616	213123	260352	312304	368980	430378	496499	567343	642910	723200	808213	897949	992408	1.09159e+06	1.19549e+06	1.30412e+06	1.41747e+06	1.53555e+06	1.65834e+06	1.78586e+06	1.9181e+06	2.05507e+06	2.19676e+06	2.34317e+06	2.4943e+06	2.65016e+06	2.81074e+06	2.97604e+06	3.14607e+06	3.32082e+06	3.50029e+06	3.68448e+06	3.8734e+06	4.06704e+06	4.2654e+06	4.46849e+06	4.6763e+06	4.88883e+06	5.10609e+06	5.32807e+06
10.5		652.511	5872.6	16312.8	31973.1	52853.4	78953.9	110274	146815	188576	235557	287757	345178	407820	475681	548762	627063	710585	799326	893288	992470	1.09687e+06	1.20649e+06	1.32134e+06	1.4414e+06	1.56668e+06	1.69718e+06	1.8329e+06	1.97385e+06	2.12001e+06	2.27139e+06	2.42799e+06	2.58982e+06	2.75686e+06	2.92912e+06	3.10661e+06	3.28931e+06	3.47723e+06	3.67038e+06	3.86874e+06	4.07232e+06	4.28113e+06	4.49515e+06	4.71439e+06	4.93886e+06	5.16854e+06	5.40345e+06	5.64357e+06	5.88891e+06
11.5		714.655	6431.9	17866.4	35018.1	57887.1	86473.3	120777	160797	206535	257991	315163	378053	446660	520984	601025	686784	778260	875453	978363	1.08699e+06	1.20134e+06	1.3214e+06	1.44718e+06	1.57867e+06	1.71589e+06	1.85882e+06	2.00747e+06	2.16183e+06	2.32191e+06	2.48771e+06	2.65923e+06	2.83647e+06	3.01942e+06	3.20809e+06	3.40247e+06	3.60258e+06	3.8084e+06	4.01994e+06	4.23719e+06	4.46016e+06	4.68885e+06	4.92326e+06	5.16338e+06	5.40923e+06	5.66078e+06	5.91806e+06	6.18105e+06	6.44976e+06
12.5		776.799	6991.19	19420	38063.2	62920.7	93992.7	131279	174780	224495	280425	342568	410927	485499	566287	653288	746504	845934	951579	1.06344e+06	1.18151e+06	1.3058e+06	1.4363e+06	1.57302e+06	1.71595e+06	1.86509e+06	2.02045e+06	2.18203e+06	2.34982e+06	2.52382e+06	2.70404e+06	2.89047e+06	3.08312e+06	3.28198e+06	3.48705e+06	3.69834e+06	3.91584e+06	4.13956e+06	4.3695e+06	4.60564e+06	4.848e+06	5.09658e+06	5.35137e+06	5.61237e+06	5.87959e+06	6.15303e+06	6.43267e+06	6.71854e+06	7.01061e+06
13.5		838.943	7550.49	20973.6	41108.2	67954.4	101512	141781	188762	242455	302858	369974	443801	524339	611590	705551	806224	913609	1.02771e+06	1.14851e+06	1.27603e+06	1.41026e+06	1.55121e+06	1.69886e+06	1.85323e+06	2.0143e+06	2.18209e+06	2.35659e+06	2.5378e+06	2.72573e+06	2.92036e+06	3.12171e+06	3.32977e+06	3.54453e+06	3.76602e+06	3.99421e+06	4.22911e+06	4.47073e+06	4.71906e+06	4.97409e+06	5.23584e+06	5.50431e+06	5.77948e+06	6.06136e+06	6.34996e+06	6.64527e+06	6.94729e+06	7.25602e+06	7.57146e+06
14.5		901.087	8109.78	22527.2	44153.3	72988.1	109032	152284	202745	260414	325292	397379	476675	563179	656892	757814	865945	981284	1.10383e+06	1.23359e+06	1.37055e+06	1.51473e+06	1.66611e+06	1.8247e+06	1.9905e+06	2.16351e+06	2.34373e+06	2.53115e+06	2.72579e+06	2.92763e+06	3.13668e+06	3.35294e+06	3.57641e+06	3.80709e+06	4.04498e+06	4.29008e+06	4.54238e+06	4.80189e+06	5.06861e+06	5.34255e+06	5.62368e+06	5.91203e+06	6.20759e+06	6.51035e+06	6.82033e+06	7.13751e+06	7.4619e+06	7.7935e+06	8.13231e+06
15.5		963.231	8669.08	24080.8	47198.3	78021.7	116551	162786	216727	278374	347726	424785	509549	602019	702195	810077	925665	1.04896e+06	1.17996e+06	1.31866e+06	1.46507e+06	1.61919e+06	1.78101e+06	1.95054e+06	2.12778e+06	2.31272e+06	2.50536e+06	2.70572e+06	2.91377e+06	3.12954e+06	3.35301e+06	3.58418e+06	3.82306e+06	4.06965e+06	4.32394e+06	4.58594e+06	4.85565e+06	5.13306e+06	5.41817e+06	5.711e+06	6.01152e+06	6.31976e+06	6.6357e+06	6.95934e+06	7.2907e+06	7.62975e+06	7.97652e+06	8.33098e+06	8.69316e+06
16.5		1025.37	9228.37	25634.4	50243.4	83055.4	124070	173288	230709	296333	370160	452190	542423	640859	747498	862340	985385	1.11663e+06	1.25608e+06	1.40374e+06	1.5596e+06	1.72366e+06	1.89592e+06	2.07638e+06	2.26505e+06	2.46193e+06	2.667e+06	2.88028e+06	3.10176e+06	3.33144e+06	3.56933e+06	3.81542e+06	4.06971e+06	4.33221e+06	4.60291e+06	4.88181e+06	5.16891e+06	5.46422e+06	5.76773e+06	6.07945e+06	6.39936e+06	6.72748e+06	7.06381e+06	7.40833e+06	7.76106e+06	8.12199e+06	8.49113e+06	8.86847e+06	9.25401e+06
17.5		1087.52	9787.67	27188	53288.4	88089	131590	183791	244692	314293	392594	479596	575297	679699	792801	914603	1.04511e+06	1.18431e+06	1.33221e+06	1.48881e+06	1.65412e+06	1.82812e+06	2.01082e+06	2.20223e+06	2.40233e+06	2.61113e+06	2.82864e+06	3.05484e+06	3.28974e+06	3.53335e+06	3.78565e+06	4.04666e+06	4.31636e+06	4.59477e+06	4.88187e+06	5.17768e+06	5.48218e+06	5.79539e+06	6.11729e+06	6.4479e+06	6.78721e+06	7.13521e+06	7.49192e+06	7.85732e+06	8.23143e+06	8.61424e+06	9.00574e+06	9.40595e+06	9.81486e+06
18.5		1149.66	10347	28741.6	56333.5	93122.7	139109	194293	258674	332253	415028	507001	608172	718539	838104	966866	1.10483e+06	1.25198e+06	1.40834e+06	1.57389e+06	1.74864e+06	1.93258e+06	2.12573e+06	2.32807e+06	2.53961e+06	2.76034e+06	2.99027e+06	3.2294e+06	3.47773e+06	3.73525e+06	4.00198e+06	4.2779e+06	4.56301e+06	4.85733e+06	5.16084e+06	5.47354e+06	5.79545e+06	6.12655e+06	6.46685e+06	6.81635e+06	7.17505e+06	7.54294e+06	7.92003e+06	8.30631e+06	8.7018e+06	9.10648e+06	9.52036e+06	9.94343e+06	1.03757e+07
19.5		1211.81	10906.3	30295.2	59378.5	98156.3	146629	204795	272657	350212	437462	534407	641046	757379	883407	1.01913e+06	1.16455e+06	1.31966e+06	1.48446e+06	1.65896e+06	1.84316e+06	2.03705e+06	2.24063e+06	2.45391e+06	2.67688e+06	2.90955e+06	3.15191e+06	3.40397e+06	3.66572e+06	3.93716e+06	4.2183e+06	4.50913e+06	4.80966e+06	5.11988e+06	5.4398e+06	5.76941e+06	6.10872e+06	6.45772e+06	6.81641e+06	7.1848e+06	7.56289e+06	7.95066e+06	8.34814e+06	8.7553e+06	9.17217e+06	9.59872e+06	1.0035e+07	1.04809e+07	1.09366e+07
20.5		1273.95	11465.6	31848.8	62423.6	103190	154148	215298	286639	368172	459896	561812	673920	796219	928710	1.07139e+06	1.22427e+06	1.38733e+06	1.56059e+06	1.74404e+06	1.93768e+06	2.14151e+06	2.35553e+06	2.57975e+06	2.81416e+06	3.05876e+06	3.31355e+06	3.57853e+06	3.8537e+06	4.13907e+06	4.43462e+06	4.74037e+06	5.05631e+06	5.38244e+06	5.71876e+06	6.06528e+06	6.42199e+06	6.78888e+06	7.16597e+06	7.55325e+06	7.95073e+06	8.35839e+06	8.77625e+06	9.20429e+06	9.64253e+06	1.0091e+07	1.05496e+07	1.10184e+07	1.14974e+07
21.5		1336.09	12024.9	33402.4	65468.6	108224	161667	225800	300621	386131	482330	589218	706794	835059	974013	1.12366e+06	1.28399e+06	1.45501e+06	1.63672e+06	1.82911e+06	2.0322e+06	2.24598e+06	2.47044e+06	2.70559e+06	2.95143e+06	3.20796e+06	3.47518e+06	3.75309e+06	4.04169e+06	4.34097e+06	4.65095e+06	4.97161e+06	5.30296e+06	5.645e+06	5.99773e+06	6.36115e+06	6.73525e+06	7.12005e+06	7.51553e+06	7.9217e+06	8.33857e+06	8.76612e+06	9.20436e+06	9.65328e+06	1.01129e+07	1.05832e+07	1.10642e+07	1.15559e+07	1.20583e+07
22.5		1398.24	12584.1	34956	68513.7	113257	169187	236302	314604	404091	504764	616623	739668	873899	1.01932e+06	1.17592e+06	1.34371e+06	1.52268e+06	1.71284e+06	1.91419e+06	2.12672e+06	2.35044e+06	2.58534e+06	2.83143e+06	3.08871e+06	3.35717e+06	3.63682e+06	3.92765e+06	4.22967e+06	4.54288e+06	4.86727e+06	5.20285e+06	5.54961e+06	5.90756e+06	6.27669e+06	6.65701e+06	7.04852e+06	7.45121e+06	7.86509e+06	8.29016e+06	8.72641e+06	9.17384e+06	9.63247e+06	1.01023e+07	1.05833e+07	1.10754e+07	1.15788e+07	1.20934e+07	1.26191e+07
23.5		1460.38	13143.4	36509.6	71558.7	118291	176706	246805	328586	422051	527198	644029	772542	912739	1.06462e+06	1.22818e+06	1.40343e+06	1.59036e+06	1.78897e+06	1.99926e+06	2.22124e+06	2.4549e+06	2.70025e+06	2.95727e+06	3.22598e+06	3.50638e+06	3.79845e+06	4.10221e+06	4.41766e+06	4.74478e+06	5.08359e+06	5.43408e+06	5.79626e+06	6.17012e+06	6.55566e+06	6.95288e+06	7.36179e+06	7.78238e+06	8.21465e+06	8.65861e+06	9.11425e+06	9.58157e+06	1.00606e+07	1.05513e+07	1.10536e+07	1.15677e+07	1.20934e+07	1.26308e+07	1.318e+07
24.5		1522.53	13702.7	38063.2	74603.8	123325	184226	257307	342568	440010	549632	671434	805416	951579	1.10992e+06	1.28044e+06	1.46315e+06	1.65803e+06	1.86509e+06	2.08434e+06	2.31576e+06	2.55937e+06	2.81515e+06	3.08312e+06	3.36326e+06	3.65559e+06	3.96009e+06	4.27678e+06	4.60564e+06	4.94669e+06	5.29991e+06	5.66532e+06	6.04291e+06	6.43267e+06	6.83462e+06	7.24875e+06	7.67506e+06	8.11354e+06	8.56421e+06	9.02706e+06	9.50209e+06	9.9893e+06	1.04887e+07	1.10003e+07	1.1524e+07	1.20599e+07	1.2608e+07	1.31683e+07	1.37408e+07
25.5		1584.67	14262	39616.8	77648.8	128358	191745	267809	356551	457970	572066	698840	838291	990419	1.15522e+06	1.33271e+06	1.52287e+06	1.72571e+06	1.94122e+06	2.16941e+06	2.41028e+06	2.66383e+06	2.93006e+06	3.20896e+06	3.50054e+06	3.80479e+06	4.12173e+06	4.45134e+06	4.79363e+06	5.14859e+06	5.51624e+06	5.89656e+06	6.28956e+06	6.69523e+06	7.11359e+06	7.54462e+06	7.98832e+06	8.44471e+06	8.91377e+06	9.39551e+06	9.88993e+06	1.0397e+07	1.09168e+07	1.14492e+07	1.19944e+07	1.25522e+07	1.31227e+07	1.37058e+07	1.43016e+07
26.5		1646.81	14821.3	41170.4	80693.9	133392	199265	278312	370533	475929	594500	726245	871165	1.02926e+06	1.20053e+06	1.38497e+06	1.58259e+06	1.79338e+06	2.01735e+06	2.25449e+06	2.5048e+06	2.76829e+06	3.04496e+06	3.3348e+06	3.63781e+06	3.954e+06	4.28336e+06	4.6259e+06	4.98161e+06	5.3505e+06	5.73256e+06	6.1278e+06	6.53621e+06	6.95779e+06	7.39255e+06	7.84048e+06	8.30159e+06	8.77587e+06	9.26333e+06	9.76396e+06	1.02778e+07	1.08047e+07	1.13449e+07	1.18982e+07	1.24647e+07	1.30444e+07	1.36373e+07	1.42433e+07	1.48625e+07
27.5		1708.96	15380.6	42724	83739	138426	206784	288814	384516	493889	616934	753651	904039	1.0681e+06	1.24583e+06	1.43723e+06	1.64231e+06	1.86106e+06	2.09347e+06	2.33956e+06	2.59933e+06	2.87276e+06	3.15986e+06	3.46064e+06	3.77509e+06	4.10321e+06	4.445e+06	4.80046e+06	5.1696e+06	5.55241e+06	5.94888e+06	6.35903e+06	6.78286e+06	7.22035e+06	7.67151e+06	8.13635e+06	8.61486e+06	9.10704e+06	9.61289e+06	1.01324e+07	1.06656e+07	1.12125e+07	1.1773e+07	1.23472e+07	1.29351e+07	1.35367e+07	1.41519e+07	1.47808e+07	1.54233e+07
28.5		1771.1	15939.9	44277.6	86784	143459	214303	299316	398498	511849	639368	781056	936913	1.10694e+06	1.29113e+06	1.4895e+06	1.70203e+06	1.92873e+06	2.1696e+06	2.42464e+06	2.69385e+06	2.97722e+06	3.27477e+06	3.58648e+06	3.91236e+06	4.25242e+06	4.60664e+06	4.97503e+06	5.35758e+06	5.75431e+06	6.16521e+06	6.59027e+06	7.0295e+06	7.48291e+06	7.95048e+06	8.43222e+06	8.92813e+06	9.4382e+06	9.96245e+06	1.05009e+07	1.10534e+07	1.16202e+07	1.22011e+07	1.27962e+07	1.34055e+07	1.40289e+07	1.46665e+07	1.53183e+07	1.59842e+07
29.5		1833.25	16499.2	45831.2	89829.1	148493	221823	309819	412480	529808	661802	808462	969787	1.14578e+06	1.33644e+06	1.54176e+06	1.76175e+06	1.9964e+06	2.24573e+06	2.50971e+06	2.78837e+06	3.08169e+06	3.38967e+06	3.71232e+06	4.04964e+06	4.40162e+06	4.76827e+06	5.14959e+06	5.54557e+06	5.95622e+06	6.38153e+06	6.82151e+06	7.27615e+06	7.74546e+06	8.22944e+06	8.72808e+06	9.24139e+06	9.76937e+06	1.0312e+07	1.08693e+07	1.14413e+07	1.20279e+07	1.26292e+07	1.32452e+07	1.38758e+07	1.45211e+07	1.51811e+07	1.58557e+07	1.6545e+07
30.5		1895.39	17058.5	47384.8	92874.1	153527	229342	320321	426463	547768	684236	835867	1.00266e+06	1.18462e+06	1.38174e+06	1.59402e+06	1.82147e+06	2.06408e+06	2.32185e+06	2.59479e+06	2.88289e+06	3.18615e+06	3.50458e+06	3.83816e+06	4.18692e+06	4.55083e+06	4.92991e+06	5.32415e+06	5.73355e+06	6.15812e+06	6.59785e+06	7.05275e+06	7.5228e+06	8.00802e+06	8.50841e+06	9.02395e+06	9.55466e+06	1.01005e+07	1.06616e+07	1.12378e+07	1.18291e+07	1.24357e+07	1.30573e+07	1.36942e+07	1.43462e+07	1.50134e+07	1.56957e+07	1.63932e+07	1.71059e+07
31.5		1957.53	17617.8	48938.3	95919.2	158560	236862	330823	440445	565727	706670	863272	1.03554e+06	1.22346e+06	1.42704e+06	1.64629e+06	1.88119e+06	2.13175e+06	2.39798e+06	2.67986e+06	2.97741e+06	3.29061e+06	3.61948e+06	3.96401e+06	4.32419e+06	4.70004e+06	5.09155e+06	5.49871e+06	5.92154e+06	6.36003e+06	6.81418e+06	7.28398e+06	7.76945e+06	8.27058e+06	8.78737e+06	9.31982e+06	9.86793e+06	1.04317e+07	1.10111e+07	1.16062e+07	1.2217e+07	1.28434e+07	1.34855e+07	1.41432e+07	1.48166e+07	1.55056e+07	1.62103e+07	1.69307e+07	1.76667e+07
32.5		2019.68	18177.1	50491.9	98964.2	163594	244381	341326	454428	583687	729104	890678	1.06841e+06	1.2623e+06	1.47235e+06	1.69855e+06	1.94091e+06	2.19943e+06	2.47411e+06	2.76494e+06	3.07193e+06	3.39508e+06	3.73438e+06	4.08985e+06	4.46147e+06	4.84925e+06	5.25318e+06	5.67328e+06	6.10953e+06	6.56193e+06	7.0305e+06	7.51522e+06	8.0161e+06	8.53314e+06	9.06633e+06	9.61569e+06	1.01812e+07	1.07629e+07	1.13607e+07	1.19747e+07	1.26048e+07	1.32511e+07	1.39136e+07	1.45922e+07	1.52869e+07	1.59979e+07	1.6725e+07	1.74682e+07	1.82276e+07
33.5		2081.82	18736.4	52045.5	102009	168628	251900	351828	468410	601647	751538	918083	1.10128e+06	1.30114e+06	1.51765e+06	1.75081e+06	2.00063e+06	2.2671e+06	2.55023e+06	2.85001e+06	3.16645e+06	3.49954e+06	3.84929e+06	4.21569e+06	4.59874e+06	4.99845e+06	5.41482e+06	5.84784e+06	6.29751e+06	6.76384e+06	7.24682e+06	7.74646e+06	8.26275e+06	8.7957e+06	9.3453e+06	9.91155e+06	1.04945e+07	1.1094e+07	1.17102e+07	1.23431e+07	1.29926e+07	1.36588e+07	1.43417e+07	1.50412e+07	1.57573e+07	1.64901e+07	1.72396e+07	1.80057e+07	1.87884e+07
34.5		2143.97	19295.7	53599.1	105054	173661	259420	362330	482392	619606	773972	945489	1.13416e+06	1.33998e+06	1.56295e+06	1.80308e+06	2.06035e+06	2.33478e+06	2.62636e+06	2.93509e+06	3.26097e+06	3.60401e+06	3.96419e+06	4.34153e+06	4.73602e+06	5.14766e+06	5.57645e+06	6.0224e+06	6.4855e+06	6.96574e+06	7.46314e+06	7.9777e+06	8.5094e+06	9.05826e+06	9.62426e+06	1.02074e+07	1.08077e+07	1.14252e+07	1.20598e+07	1.27116e+07	1.33805e+07	1.40666e+07	1.47698e+07	1.54902e+07	1.62277e+07	1.69824e+07	1.77542e+07	1.85432e+07	1.93493e+07
35.5		2206.11	19855	55152.7	108099	178695	266939	372833	496375	637566	796406	972894	1.16703e+06	1.37882e+06	1.60825e+06	1.85534e+06	2.12007e+06	2.40245e+06	2.70248e+06	3.02016e+06	3.35549e+06	3.70847e+06	4.0791e+06	4.46737e+06	4.8733e+06	5.29687e+06	5.73809e+06	6.19696e+06	6.67348e+06	7.16765e+06	7.67947e+06	8.20893e+06	8.75605e+06	9.32081e+06	9.90323e+06	1.05033e+07	1.1121e+07	1.17564e+07	1.24094e+07	1.308e+07	1.37683e+07	1.44743e+07	1.51979e+07	1.59391e+07	1.6698e+07	1.74746e+07	1.82688e+07	1.90806e+07	1.99101e+07
36.5		2268.25	20414.3	56706.3	111144	183729	274459	383335	510357	655525	818840	1.0003e+06	1.19991e+06	1.41766e+06	1.65356e+06	1.9076e+06	2.17979e+06	2.47013e+06	2.77861e+06	3.10524e+06	3.45001e+06	3.81293e+06	4.194e+06	4.59321e+06	5.01057e+06	5.44608e+06	5.89973e+06	6.37152e+06	6.86147e+06	7.36956e+06	7.89579e+06	8.44017e+06	9.0027e+06	9.58337e+06	1.01822e+07	1.07992e+07	1.14343e+07	1.20875e+07	1.27589e+07	1.34485e+07	1.41562e+07	1.4882e+07	1.5626e+07	1.63881e+07	1.71684e+07	1.79668e+07	1.87834e+07	1.96181e+07	2.0471e+07
37.5		2330.4	20973.6	58259.9	114189	188762	281978	393837	524339	673485	841274	1.02771e+06	1.23278e+06	1.4565e+06	1.69886e+06	1.95986e+06	2.23951e+06	2.5378e+06	2.85474e+06	3.19031e+06	3.54453e+06	3.9174e+06	4.30891e+06	4.71906e+06	5.14785e+06	5.59528e+06	6.06136e+06	6.54609e+06	7.04945e+06	7.57146e+06	8.11211e+06	8.67141e+06	9.24935e+06	9.84593e+06	1.04612e+07	1.1095e+07	1.17475e+07	1.24187e+07	1.31085e+07	1.38169e+07	1.4544e+07	1.52897e+07	1.60541e+07	1.68371e+07	1.76388e+07	1.84591e+07	1.9298e+07	2.01556e+07	2.10318e+07
38.5		2392.54	21532.9	59813.5	117235	193796	289498	404340	538322	691444	863707	1.05511e+06	1.26565e+06	1.49534e+06	1.74416e+06	2.01213e+06	2.29923e+06	2.60548e+06	2.93086e+06	3.27539e+06	3.63906e+06	4.02186e+06	4.42381e+06	4.8449e+06	5.28512e+06	5.74449e+06	6.223e+06	6.72065e+06	7.23744e+06	7.77337e+06	8.32844e+06	8.90265e+06	9.496e+06	1.01085e+07	1.07401e+07	1.13909e+07	1.20608e+07	1.27499e+07	1.3458e+07	1.41854e+07	1.49319e+07	1.56975e+07	1.64822e+07	1.72861e+07	1.81091e+07	1.89513e+07	1.98126e+07	2.06931e+07	2.15927e+07
39.5		2454.69	22092.2	61367.1	120280	198830	297017	414842	552304	709404	886141	1.08252e+06	1.29853e+06	1.53418e+06	1.78947e+06	2.06439e+06	2.35895e+06	2.67315e+06	3.00699e+06	3.36046e+06	3.73358e+06	4.12633e+06	4.53871e+06	4.97074e+06	5.4224e+06	5.8937e+06	6.38464e+06	6.89521e+06	7.42542e+06	7.97527e+06	8.54476e+06	9.13388e+06	9.74265e+06	1.0371e+07	1.10191e+07	1.16868e+07	1.23741e+07	1.3081e+07	1.38076e+07	1.45538e+07	1.53197e+07	1.61052e+07	1.69103e+07	1.77351e+07	1.85795e+07	1.94436e+07	2.03272e+07	2.12306e+07	2.21535e+07
40.5		2516.83	22651.5	62920.7	123325	203863	304536	425344	566287	727364	908575	1.10992e+06	1.3314e+06	1.57302e+06	1.83477e+06	2.11665e+06	2.41867e+06	2.74083e+06	3.08312e+06	3.44554e+06	3.8281e+06	4.23079e+06	4.65362e+06	5.09658e+06	5.55968e+06	6.04291e+06	6.54627e+06	7.06977e+06	7.61341e+06	8.17718e+06	8.76108e+06	9.36512e+06	9.9893e+06	1.06336e+07	1.1298e+07	1.19826e+07	1.26873e+07	1.34122e+07	1.41572e+07	1.49223e+07	1.57075e+07	1.65129e+07	1.73384e+07	1.81841e+07	1.90499e+07	1.99358e+07	2.08419e+07	2.17681e+07	2.27144e+07
41.5		2578.97	23210.8	64474.3	126370	208897	312056	435846	580269	745323	931009	1.13733e+06	1.36428e+06	1.61186e+06	1.88007e+06	2.16892e+06	2.47839e+06	2.8085e+06	3.15924e+06	3.53061e+06	3.92262e+06	4.33525e+06	4.76852e+06	5.22242e+06	5.69695e+06	6.19211e+06	6.70791e+06	7.24434e+06	7.80139e+06	8.37908e+06	8.97741e+06	9.59636e+06	1.02359e+07	1.08962e+07	1.1577e+07	1.22785e+07	1.30006e+07	1.37433e+07	1.45067e+07	1.52907e+07	1.60954e+07	1.69206e+07	1.77665e+07	1.86331e+07	1.95202e+07	2.0428e+07	2.13565e+07	2.23055e+07	2.32752e+07
42.5		2641.12	23770.1	66027.9	129415	213930	319575	446349	594251	763283	953443	1.16473e+06	1.39715e+06	1.6507e+06	1.92537e+06	2.22118e+06	2.53811e+06	2.87618e+06	3.23537e+06	3.61569e+06	4.01714e+06	4.43972e+06	4.88343e+06	5.34826e+06	5.83423e+06	6.34132e+06	6.86955e+06	7.4189e+06	7.98938e+06	8.58099e+06	9.19373e+06	9.8276e+06	1.04826e+07	1.11587e+07	1.1856e+07	1.25744e+07	1.33139e+07	1.40745e+07	1.48563e+07	1.56592e+07	1.64832e+07	1.73284e+07	1.81947e+07	1.90821e+07	1.99906e+07	2.09203e+07	2.18711e+07	2.2843e+07	2.38361e+07
43.5		2703.26	24329.4	67581.5	132460	218964	327095	456851	608234	781242	975877	1.19214e+06	1.43003e+06	1.68954e+06	1.97068e+06	2.27344e+06	2.59783e+06	2.94385e+06	3.31149e+06	3.70076e+06	4.11166e+06	4.54418e+06	4.99833e+06	5.4741e+06	5.9715e+06	6.49053e+06	7.03118e+06	7.59346e+06	8.17736e+06	8.7829e+06	9.41005e+06	1.00588e+07	1.07292e+07	1.14213e+07	1.21349e+07	1.28702e+07	1.36271e+07	1.44057e+07	1.52058e+07	1.60276e+07	1.68711e+07	1.77361e+07	1.86228e+07	1.95311e+07	2.0461e+07	2.14125e+07	2.23857e+07	2.33805e+07	2.43969e+07
44.5		2765.41	24888.6	69135.1	135505	223998	334614	467353	622216	799202	998311	1.21954e+06	1.4629e+06	1.72838e+06	2.01598e+06	2.32571e+06	2.65755e+06	3.01153e+06	3.38762e+06	3.78584e+06	4.20618e+06	4.64865e+06	5.11323e+06	5.59995e+06	6.10878e+06	6.63974e+06	7.19282e+06	7.76802e+06	8.36535e+06	8.9848e+06	9.62638e+06	1.02901e+07	1.09759e+07	1.16838e+07	1.24139e+07	1.31661e+07	1.39404e+07	1.47368e+07	1.55554e+07	1.63961e+07	1.72589e+07	1.81438e+07	1.90509e+07	1.99801e+07	2.09314e+07	2.19048e+07	2.29003e+07	2.3918e+07	2.49578e+07
45.5		2827.55	25447.9	70688.7	138550	229031	342133	477856	636199	817162	1.02075e+06	1.24695e+06	1.49577e+06	1.76722e+06	2.06128e+06	2.37797e+06	2.71727e+06	3.0792e+06	3.46375e+06	3.87091e+06	4.3007e+06	4.75311e+06	5.22814e+06	5.72579e+06	6.24606e+06	6.78895e+06	7.35446e+06	7.94259e+06	8.55334e+06	9.18671e+06	9.8427e+06	1.05213e+07	1.12225e+07	1.19464e+07	1.26929e+07	1.3462e+07	1.42537e+07	1.5068e+07	1.5905e+07	1.67645e+07	1.76467e+07	1.85515e+07	1.9479e+07	2.0429e+07	2.14017e+07	2.2397e+07	2.34149e+07	2.44555e+07	2.55186e+07
46.5		2889.69	26007.2	72242.3	141595	234065	349653	488358	650181	835121	1.04318e+06	1.27435e+06	1.52865e+06	1.80606e+06	2.10659e+06	2.43023e+06	2.77699e+06	3.14688e+06	3.53987e+06	3.95599e+06	4.39522e+06	4.85757e+06	5.34304e+06	5.85163e+06	6.38333e+06	6.93815e+06	7.51609e+06	8.11715e+06	8.74132e+06	9.38861e+06	1.0059e+07	1.07525e+07	1.14692e+07	1.2209e+07	1.29718e+07	1.37578e+07	1.45669e+07	1.53992e+07	1.62545e+07	1.7133e+07	1.80346e+07	1.89593e+07	1.99071e+07	2.0878e+07	2.18721e+07	2.28893e+07	2.39295e+07	2.4993e+07	2.60795e+07
47.5		2951.84	26566.5	73795.9	144640	239099	357172	498860	664163	853081	1.06561e+06	1.30176e+06	1.56152e+06	1.8449e+06	2.15189e+06	2.48249e+06	2.83672e+06	3.21455e+06	3.616e+06	4.04106e+06	4.48974e+06	4.96204e+06	5.45795e+06	5.97747e+06	6.52061e+06	7.08736e+06	7.67773e+06	8.29171e+06	8.92931e+06	9.59052e+06	1.02753e+07	1.09838e+07	1.17158e+07	1.24715e+07	1.32508e+07	1.40537e+07	1.48802e+07	1.57303e+07	1.66041e+07	1.75014e+07	1.84224e+07	1.9367e+07	2.03352e+07	2.1327e+07	2.23425e+07	2.33815e+07	2.44442e+07	2.55304e+07	2.66403e+07
48.5		3013.98	27125.8	75349.5	147685	244132	364692	509363	678146	871040	1.08805e+06	1.32917e+06	1.5944e+06	1.88374e+06	2.19719e+06	2.53476e+06	2.89644e+06	3.28223e+06	3.69213e+06	4.12614e+06	4.58426e+06	5.0665e+06	5.57285e+06	6.10331e+06	6.65788e+06	7.23657e+06	7.83936e+06	8.46627e+06	9.11729e+06	9.79242e+06	1.04917e+07	1.1215e+07	1.19625e+07	1.27341e+07	1.35298e+07	1.43496e+07	1.51935e+07	1.60615e+07	1.69536e+07	1.78699e+07	1.88103e+07	1.97747e+07	2.07633e+07	2.1776e+07	2.28128e+07	2.38737e+07	2.49588e+07	2.60679e+07	2.72012e+07
49.5		3076.12	27685.1	76903.1	150730	249166	372211	519865	692128	889000	1.11048e+06	1.35657e+06	1.62727e+06	1.92258e+06	2.24249e+06	2.58702e+06	2.95616e+06	3.3499e+06	3.76825e+06	4.21121e+06	4.67879e+06	5.17097e+06	5.68775e+06	6.22915e+06	6.79516e+06	7.38578e+06	8.001e+06	8.64083e+06	9.30528e+06	9.99433e+06	1.0708e+07	1.14463e+07	1.22091e+07	1.29966e+07	1.38087e+07	1.46454e+07	1.55067e+07	1.63927e+07	1.73032e+07	1.82383e+07	1.91981e+07	2.01825e+07	2.11914e+07	2.2225e+07	2.32832e+07	2.4366e+07	2.54734e+07	2.66054e+07	2.7762e+07
50.5		3138.27	28244.4	78456.7	153775	254200	379731	530367	706110	906960	1.13291e+06	1.38398e+06	1.66014e+06	1.96142e+06	2.2878e+06	2.63928e+06	3.01588e+06	3.41757e+06	3.84438e+06	4.29629e+06	4.77331e+06	5.27543e+06	5.80266e+06	6.35499e+06	6.93244e+06	7.53498e+06	8.16264e+06	8.8154e+06	9.49326e+06	1.01962e+07	1.09243e+07	1.16775e+07	1.24558e+07	1.32592e+07	1.40877e+07	1.49413e+07	1.582e+07	1.67238e+07	1.76528e+07	1.86068e+07	1.95859e+07	2.05902e+07	2.16195e+07	2.2674e+07	2.37536e+07	2.48582e+07	2.5988e+07	2.71429e+07	2.83229e+07
51.5		3200.41	28803.7	80010.3	156820	259233	387250	540870	720093	924919	1.15535e+06	1.41138e+06	1.69302e+06	2.00026e+06	2.3331e+06	2.69155e+06	3.0756e+06	3.48525e+06	3.92051e+06	4.38136e+06	4.86783e+06	5.37989e+06	5.91756e+06	6.48084e+06	7.06971e+06	7.68419e+06	8.32427e+06	8.98996e+06	9.68125e+06	1.03981e+07	1.11406e+07	1.19087e+07	1.27024e+07	1.35217e+07	1.43667e+07	1.52372e+07	1.61333e+07	1.7055e+07	1.80023e+07	1.89752e+07	1.99738e+07	2.09979e+07	2.20476e+07	2.3123e+07	2.42239e+07	2.53505e+07	2.65026e+07	2.76804e+07	2.88837e+07
52.5		3262.56	29363	81563.9	159865	264267	394769	551372	734075	942879	1.17778e+06	1.43879e+06	1.72589e+06	2.0391e+06	2.3784e+06	2.74381e+06	3.13532e+06	3.55292e+06	3.99663e+06	4.46644e+06	4.96235e+06	5.48436e+06	6.03247e+06	6.60668e+06	7.20699e+06	7.8334e+06	8.48591e+06	9.16452e+06	9.86923e+06	1.06e+07	1.1357e+07	1.214e+07	1.29491e+07	1.37843e+07	1.46456e+07	1.5533e+07	1.64465e+07	1.73862e+07	1.83519e+07	1.93437e+07	2.03616e+07	2.14056e+07	2.24758e+07	2.3572e+07	2.46943e+07	2.58427e+07	2.70172e+07	2.82179e+07	2.94446e+07
53.5		3324.7	29922.3	83117.5	162910	269301	402289	561874	748058	960838	1.20022e+06	1.46619e+06	1.75877e+06	2.07794e+06	2.42371e+06	2.79607e+06	3.19504e+06	3.6206e+06	4.07276e+06	4.55151e+06	5.05687e+06	5.58882e+06	6.14737e+06	6.73252e+06	7.34426e+06	7.98261e+06	8.64755e+06	9.33908e+06	1.00572e+07	1.0802e+07	1.15733e+07	1.23712e+07	1.31957e+07	1.40469e+07	1.49246e+07	1.58289e+07	1.67598e+07	1.77173e+07	1.87014e+07	1.97121e+07	2.07495e+07	2.18134e+07	2.29039e+07	2.4021e+07	2.51647e+07	2.6335e+07	2.75318e+07	2.87553e+07	3.00054e+07
54.5		3386.84	30481.6	84671.1	165955	274334	409808	572377	762040	978798	1.22265e+06	1.4936e+06	1.79164e+06	2.11678e+06	2.46901e+06	2.84834e+06	3.25476e+06	3.68827e+06	4.14888e+06	4.63659e+06	5.15139e+06	5.69329e+06	6.26228e+06	6.85836e+06	7.48154e+06	8.13181e+06	8.80918e+06	9.51365e+06	1.02452e+07	1.10039e+07	1.17896e+07	1.26024e+07	1.34424e+07	1.43094e+07	1.52035e+07	1.61248e+07	1.70731e+07	1.80485e+07	1.9051e+07	2.00806e+07	2.11373e+07	2.22211e+07	2.3332e+07	2.447e+07	2.5635e+07	2.68272e+07	2.80465e+07	2.92928e+07	3.05663e+07
55.5		3448.99	31040.9	86224.7	169000	279368	417328	582879	776022	996758	1.24508e+06	1.521e+06	1.82451e+06	2.15562e+06	2.51431e+06	2.9006e+06	3.31448e+06	3.75595e+06	4.22501e+06	4.72167e+06	5.24591e+06	5.79775e+06	6.37718e+06	6.9842e+06	7.61882e+06	8.28102e+06	8.97082e+06	9.68821e+06	1.04332e+07	1.12058e+07	1.20059e+07	1.28337e+07	1.3689e+07	1.4572e+07	1.54825e+07	1.64206e+07	1.73864e+07	1.83797e+07	1.94006e+07	2.04491e+07	2.15251e+07	2.26288e+07	2.37601e+07	2.49189e+07	2.61054e+07	2.73194e+07	2.85611e+07	2.98303e+07	3.11271e+07
56.5		3511.13	31600.2	87778.3	172045	284402	424847	593381	790005	1.01472e+06	1.26752e+06	1.54841e+06	1.85739e+06	2.19446e+06	2.55962e+06	2.95286e+06	3.3742e+06	3.82362e+06	4.30114e+06	4.80674e+06	5.34043e+06	5.90221e+06	6.49208e+06	7.11004e+06	7.75609e+06	8.43023e+06	9.13246e+06	9.86277e+06	1.06212e+07	1.14077e+07	1.22223e+07	1.30649e+07	1.39357e+07	1.48345e+07	1.57615e+07	1.67165e+07	1.76996e+07	1.87108e+07	1.97501e+07	2.08175e+07	2.1913e+07	2.30365e+07	2.41882e+07	2.53679e+07	2.65758e+07	2.78117e+07	2.90757e+07	3.03678e+07	3.1688e+07
57.5		3573.28	32159.5	89331.9	175091	289435	432366	603884	803987	1.03268e+06	1.28995e+06	1.57581e+06	1.89026e+06	2.2333e+06	2.60492e+06	3.00513e+06	3.43392e+06	3.8913e+06	4.37726e+06	4.89182e+06	5.43495e+06	6.00668e+06	6.60699e+06	7.23588e+06	7.89337e+06	8.57944e+06	9.29409e+06	1.00373e+07	1.08092e+07	1.16096e+07	1.24386e+07	1.32962e+07	1.41823e+07	1.50971e+07	1.60404e+07	1.70124e+07	1.80129e+07	1.9042e+07	2.00997e+07	2.1186e+07	2.23008e+07	2.34443e+07	2.46163e+07	2.58169e+07	2.70461e+07	2.83039e+07	2.95903e+07	3.09053e+07	3.22488e+07
58.5		3635.42	32718.8	90885.5	178136	294469	439886	614386	817970	1.05064e+06	1.31239e+06	1.60322e+06	1.92314e+06	2.27214e+06	2.65022e+06	3.05739e+06	3.49364e+06	3.95897e+06	4.45339e+06	4.97689e+06	5.52947e+06	6.11114e+06	6.72189e+06	7.36173e+06	8.03064e+06	8.72864e+06	9.45573e+06	1.02119e+07	1.09971e+07	1.18115e+07	1.26549e+07	1.35274e+07	1.4429e+07	1.53597e+07	1.63194e+07	1.73082e+07	1.83262e+07	1.93732e+07	2.04492e+07	2.15544e+07	2.26887e+07	2.3852e+07	2.50444e+07	2.62659e+07	2.75165e+07	2.87962e+07	3.01049e+07	3.14427e+07	3.28097e+07
59.5		3697.56	33278.1	92439.1	181181	299503	447405	624888	831952	1.0686e+06	1.33482e+06	1.63063e+06	1.95601e+06	2.31098e+06	2.69552e+06	3.10965e+06	3.55336e+06	4.02665e+06	4.52952e+06	5.06197e+06	5.624e+06	6.21561e+06	6.8368e+06	7.48757e+06	8.16792e+06	8.87785e+06	9.61736e+06	1.03865e+07	1.11851e+07	1.20134e+07	1.28712e+07	1.37586e+07	1.46756e+07	1.56222e+07	1.65984e+07	1.76041e+07	1.86394e+07	1.97043e+07	2.07988e+07	2.19229e+07	2.30765e+07	2.42597e+07	2.54725e+07	2.67149e+07	2.79869e+07	2.92884e+07	3.06195e+07	3.19802e+07	3.33705e+07
60.5		3759.71	33837.4	93992.7	184226	304536	454925	635391	845934	1.08656e+06	1.35725e+06	1.65803e+06	1.98889e+06	2.34982e+06	2.74083e+06	3.16191e+06	3.61308e+06	4.09432e+06	4.60564e+06	5.14704e+06	5.71852e+06	6.32007e+06	6.9517e+06	7.61341e+06	8.3052e+06	9.02706e+06	9.779e+06	1.0561e+07	1.13731e+07	1.22153e+07	1.30875e+07	1.39899e+07	1.49223e+07	1.58848e+07	1.68773e+07	1.79e+07	1.89527e+07	2.00355e+07	2.11484e+07	2.22913e+07	2.34643e+07	2.46674e+07	2.59006e+07	2.71639e+07	2.84572e+07	2.97806e+07	3.11341e+07	3.25177e+07	3.39314e+07
61.5		3821.85	34396.7	95546.3	187271	309570	462444	645893	859917	1.10452e+06	1.37969e+06	1.68544e+06	2.02176e+06	2.38866e+06	2.78613e+06	3.21418e+06	3.6728e+06	4.162e+06	4.68177e+06	5.23212e+06	5.81304e+06	6.42453e+06	7.0666e+06	7.73925e+06	8.44247e+06	9.17627e+06	9.94064e+06	1.07356e+07	1.15611e+07	1.24172e+07	1.33039e+07	1.42211e+07	1.51689e+07	1.61473e+07	1.71563e+07	1.81958e+07	1.9266e+07	2.03666e+07	2.14979e+07	2.26598e+07	2.38522e+07	2.50752e+07	2.63287e+07	2.76129e+07	2.89276e+07	3.02729e+07	3.16488e+07	3.30552e+07	3.44922e+07
62.5		3884	34956	97099.9	190316	314604	469964	656395	873899	1.12247e+06	1.40212e+06	1.71284e+06	2.05463e+06	2.4275e+06	2.83143e+06	3.26644e+06	3.73252e+06	4.22967e+06	4.75789e+06	5.31719e+06	5.90756e+06	6.529e+06	7.18151e+06	7.86509e+06	8.57975e+06	9.32547e+06	1.01023e+07	1.09101e+07	1.17491e+07	1.26191e+07	1.35202e+07	1.44523e+07	1.54156e+07	1.64099e+07	1.74353e+07	1.84917e+07	1.95792e+07	2.06978e+07	2.18475e+07	2.30282e+07	2.424e+07	2.54829e+07	2.67568e+07	2.80619e+07	2.9398e+07	3.07651e+07	3.21634e+07	3.35927e+07	3.50531e+07
63.5		3946.14	35515.3	98653.5	193361	319637	477483	666898	887881	1.14043e+06	1.42456e+06	1.74025e+06	2.08751e+06	2.46634e+06	2.87674e+06	3.3187e+06	3.79224e+06	4.29735e+06	4.83402e+06	5.40227e+06	6.00208e+06	6.63346e+06	7.29641e+06	7.99093e+06	8.71702e+06	9.47468e+06	1.02639e+07	1.10847e+07	1.19371e+07	1.2821e+07	1.37365e+07	1.46836e+07	1.56622e+07	1.66724e+07	1.77142e+07	1.87876e+07	1.98925e+07	2.1029e+07	2.2197e+07	2.33967e+07	2.46279e+07	2.58906e+07	2.7185e+07	2.85109e+07	2.98683e+07	3.12574e+07	3.2678e+07	3.41302e+07	3.56139e+07
64.5		4008.28	36074.6	100207	196406	324671	485002	677400	901864	1.15839e+06	1.44699e+06	1.76765e+06	2.12038e+06	2.50518e+06	2.92204e+06	3.37097e+06	3.85196e+06	4.36502e+06	4.91015e+06	5.48734e+06	6.0966e+06	6.73793e+06	7.41132e+06	8.11677e+06	8.8543e+06	9.62389e+06	1.04255e+07	1.12593e+07	1.21251e+07	1.30229e+07	1.39528e+07	1.49148e+07	1.59089e+07	1.6935e+07	1.79932e+07	1.90834e+07	2.02058e+07	2.13601e+07	2.25466e+07	2.37651e+07	2.50157e+07	2.62983e+07	2.76131e+07	2.89599e+07	3.03387e+07	3.17496e+07	3.31926e+07	3.46676e+07	3.61748e+07
65.5		4070.43	36633.8	101761	199451	329705	492522	687902	915846	1.17635e+06	1.46942e+06	1.79506e+06	2.15326e+06	2.54402e+06	2.96734e+06	3.42323e+06	3.91168e+06	4.4327e+06	4.98627e+06	5.57242e+06	6.19112e+06	6.84239e+06	7.52622e+06	8.24262e+06	8.99157e+06	9.7731e+06	1.05872e+07	1.14338e+07	1.2313e+07	1.32248e+07	1.41692e+07	1.51461e+07	1.61555e+07	1.71976e+07	1.82721e+07	1.93793e+07	2.0519e+07	2.16913e+07	2.28962e+07	2.41336e+07	2.54035e+07	2.67061e+07	2.80412e+07	2.94088e+07	3.08091e+07	3.22419e+07	3.37072e+07	3.52051e+07	3.67356e+07
66.5		4132.57	37193.1	103314	202496	334738	500041	698405	929829	1.19431e+06	1.49186e+06	1.82246e+06	2.18613e+06	2.58286e+06	3.01264e+06	3.47549e+06	3.9714e+06	4.50037e+06	5.0624e+06	5.65749e+06	6.28564e+06	6.94685e+06	7.64112e+06	8.36846e+06	9.12885e+06	9.9223e+06	1.07488e+07	1.16084e+07	1.2501e+07	1.34267e+07	1.43855e+07	1.53773e+07	1.64022e+07	1.74601e+07	1.85511e+07	1.96752e+07	2.08323e+07	2.20225e+07	2.32457e+07	2.4502e+07	2.57914e+07	2.71138e+07	2.84693e+07	2.98578e+07	3.12794e+07	3.27341e+07	3.42218e+07	3.57426e+07	3.72965e+07
67.5		4194.72	37752.4	104868	205541	339772	507561	708907	943811	1.21227e+06	1.51429e+06	1.84987e+06	2.219e+06	2.6217e+06	3.05795e+06	3.52776e+06	4.03112e+06	4.56805e+06	5.13853e+06	5.74257e+06	6.38016e+06	7.05132e+06	7.75603e+06	8.4943e+06	9.26613e+06	1.00715e+07	1.09105e+07	1.1783e+07	1.2689e+07	1.36286e+07	1.46018e+07	1.56085e+07	1.66488e+07	1.77227e+07	1.88301e+07	1.9971e+07	2.11456e+07	2.23536e+07	2.35953e+07	2.48705e+07	2.61792e+07	2.75215e+07	2.88974e+07	3.03068e+07	3.17498e+07	3.32263e+07	3.47364e+07	3.62801e+07	3.78573e+07
68.5		4256.86	38311.7	106421	208586	344806	515080	719409	957793	1.23023e+06	1.53673e+06	1.87728e+06	2.25188e+06	2.66054e+06	3.10325e+06	3.58002e+06	4.09084e+06	4.63572e+06	5.21465e+06	5.82764e+06	6.47468e+06	7.15578e+06	7.87093e+06	8.62014e+06	9.4034e+06	1.02207e+07	1.10721e+07	1.19575e+07	1.2877e+07	1.38305e+07	1.48181e+07	1.58398e+07	1.68955e+07	1.79852e+07	1.9109e+07	2.02669e+07	2.14588e+07	2.26848e+07	2.39448e+07	2.52389e+07	2.65671e+07	2.79293e+07	2.93255e+07	3.07558e+07	3.22202e+07	3.37186e+07	3.52511e+07	3.68176e+07	3.84182e+07
69.5		4319	38871	107975	211631	349839	522599	729912	971776	1.24819e+06	1.55916e+06	1.90468e+06	2.28475e+06	2.69938e+06	3.14855e+06	3.63228e+06	4.15056e+06	4.70339e+06	5.29078e+06	5.91272e+06	6.5692e+06	7.26024e+06	7.98584e+06	8.74598e+06	9.54068e+06	1.03699e+07	1.12337e+07	1.21321e+07	1.3065e+07	1.40324e+07	1.50345e+07	1.6071e+07	1.71421e+07	1.82478e+07	1.9388e+07	2.05628e+07	2.17721e+07	2.3016e+07	2.42944e+07	2.56074e+07	2.69549e+07	2.8337e+07	2.97536e+07	3.12048e+07	3.26905e+07	3.42108e+07	3.57657e+07	3.73551e+07	3.8979e+07
70.5		4381.15	39430.3	109529	214676	354873	530119	740414	985758	1.26615e+06	1.58159e+06	1.93209e+06	2.31763e+06	2.73822e+06	3.19386e+06	3.68454e+06	4.21028e+06	4.77107e+06	5.36691e+06	5.99779e+06	6.66373e+06	7.36471e+06	8.10074e+06	8.87182e+06	9.67795e+06	1.05191e+07	1.13954e+07	1.23066e+07	1.3253e+07	1.42343e+07	1.52508e+07	1.63022e+07	1.73888e+07	1.85103e+07	1.9667e+07	2.08586e+07	2.20854e+07	2.33471e+07	2.4644e+07	2.59758e+07	2.73427e+07	2.87447e+07	3.01817e+07	3.16538e+07	3.31609e+07	3.47031e+07	3.62803e+07	3.78925e+07	3.95399e+07
71.5		4443.29	39989.6	111082	217721	359907	537638	750916	999741	1.28411e+06	1.60403e+06	1.95949e+06	2.3505e+06	2.77706e+06	3.23916e+06	3.73681e+06	4.27e+06	4.83874e+06	5.44303e+06	6.08287e+06	6.75825e+06	7.46917e+06	8.21565e+06	8.99766e+06	9.81523e+06	1.06683e+07	1.1557e+07	1.24812e+07	1.3441e+07	1.44363e+07	1.54671e+07	1.65335e+07	1.76354e+07	1.87729e+07	1.99459e+07	2.11545e+07	2.23986e+07	2.36783e+07	2.49935e+07	2.63443e+07	2.77306e+07	2.91524e+07	3.06098e+07	3.21028e+07	3.36313e+07	3.51953e+07	3.67949e+07	3.843e+07	4.01007e+07
72.5		4505.44	40548.9	112636	220766	364940	545158	761419	1.01372e+06	1.30207e+06	1.62646e+06	1.9869e+06	2.38338e+06	2.8159e+06	3.28446e+06	3.78907e+06	4.32972e+06	4.90642e+06	5.51916e+06	6.16794e+06	6.85277e+06	7.57364e+06	8.33055e+06	9.12351e+06	9.95251e+06	1.08176e+07	1.17186e+07	1.26558e+07	1.36289e+07	1.46382e+07	1.56834e+07	1.67647e+07	1.78821e+07	1.90355e+07	2.02249e+07	2.14504e+07	2.27119e+07	2.40095e+07	2.53431e+07	2.67127e+07	2.81184e+07	2.95602e+07	3.10379e+07	3.25518e+07	3.41016e+07	3.56876e+07	3.73095e+07	3.89675e+07	4.06616e+07
73.5		4567.58	41108.2	114189	223811	369974	552677	771921	1.02771e+06	1.32003e+06	1.6489e+06	2.0143e+06	2.41625e+06	2.85474e+06	3.32977e+06	3.84133e+06	4.38944e+06	4.97409e+06	5.59528e+06	6.25302e+06	6.94729e+06	7.6781e+06	8.44545e+06	9.24935e+06	1.00898e+07	1.09668e+07	1.18803e+07	1.28303e+07	1.38169e+07	1.48401e+07	1.58997e+07	1.6996e+07	1.81287e+07	1.9298e+07	2.05039e+07	2.17462e+07	2.30252e+07	2.43406e+07	2.56926e+07	2.70812e+07	2.85063e+07	2.99679e+07	3.14661e+07	3.30008e+07	3.4572e+07	3.61798e+07	3.78241e+07	3.9505e+07	4.12224e+07
74.5		4629.72	41667.5	115743	226856	375008	560196	782423	1.04169e+06	1.33799e+06	1.67133e+06	2.04171e+06	2.44912e+06	2.89358e+06	3.37507e+06	3.8936e+06	4.44916e+06	5.04177e+06	5.67141e+06	6.33809e+06	7.04181e+06	7.78256e+06	8.56036e+06	9.37519e+06	1.02271e+07	1.1116e+07	1.20419e+07	1.30049e+07	1.40049e+07	1.5042e+07	1.61161e+07	1.72272e+07	1.83754e+07	1.95606e+07	2.07828e+07	2.20421e+07	2.33384e+07	2.46718e+07	2.60422e+07	2.74496e+07	2.88941e+07	3.03756e+07	3.18942e+07	3.34497e+07	3.50424e+07	3.6672e+07	3.83387e+07	4.00425e+07	4.17833e+07
75.5		4691.87	42226.8	117297	229901	380041	567716	792926	1.05567e+06	1.35595e+06	1.69376e+06	2.06911e+06	2.482e+06	2.93242e+06	3.42037e+06	3.94586e+06	4.50888e+06	5.10944e+06	5.74754e+06	6.42317e+06	7.13633e+06	7.88703e+06	8.67526e+06	9.50103e+06	1.03643e+07	1.12652e+07	1.22035e+07	1.31795e+07	1.41929e+07	1.52439e+07	1.63324e+07	1.74584e+07	1.8622e+07	1.98231e+07	2.10618e+07	2.2338e+07	2.36517e+07	2.5003e+07	2.63918e+07	2.78181e+07	2.92819e+07	3.07833e+07	3.23223e+07	3.38987e+07	3.55127e+07	3.71643e+07	3.88534e+07	4.058e+07	4.23441e+07
76.5		4754.01	42786.1	118850	232947	385075	575235	803428	1.06965e+06	1.37391e+06	1.7162e+06	2.09652e+06	2.51487e+06	2.97126e+06	3.46567e+06	3.99812e+06	4.5686e+06	5.17712e+06	5.82366e+06	6.50824e+06	7.23085e+06	7.99149e+06	8.79017e+06	9.62687e+06	1.05016e+07	1.14144e+07	1.23652e+07	1.3354e+07	1.43809e+07	1.54458e+07	1.65487e+07	1.76897e+07	1.88687e+07	2.00857e+07	2.13408e+07	2.26338e+07	2.3965e+07	2.53341e+07	2.67413e+07	2.81865e+07	2.96698e+07	3.11911e+07	3.27504e+07	3.43477e+07	3.59831e+07	3.76565e+07	3.9368e+07	4.11174e+07	4.29049e+07
77.5		4816.15	43345.4	120404	235992	390109	582755	813930	1.08363e+06	1.39187e+06	1.73863e+06	2.12392e+06	2.54775e+06	3.0101e+06	3.51098e+06	4.05039e+06	4.62832e+06	5.24479e+06	5.89979e+06	6.59332e+06	7.32537e+06	8.09596e+06	8.90507e+06	9.75271e+06	1.06389e+07	1.15636e+07	1.25268e+07	1.35286e+07	1.45689e+07	1.56477e+07	1.6765e+07	1.79209e+07	1.91153e+07	2.03483e+07	2.16197e+07	2.29297e+07	2.42782e+07	2.56653e+07	2.70909e+07	2.8555e+07	3.00576e+07	3.15988e+07	3.31785e+07	3.47967e+07	3.64535e+07	3.81488e+07	3.98826e+07	4.16549e+07	4.34658e+07
78.5		4878.3	43904.7	121957	239037	395142	590274	824433	1.09762e+06	1.40983e+06	1.76107e+06	2.15133e+06	2.58062e+06	3.04894e+06	3.55628e+06	4.10265e+06	4.68805e+06	5.31247e+06	5.97592e+06	6.67839e+06	7.41989e+06	8.20042e+06	9.01997e+06	9.87856e+06	1.07762e+07	1.17128e+07	1.26885e+07	1.37031e+07	1.47569e+07	1.58496e+07	1.69814e+07	1.81522e+07	1.9362e+07	2.06108e+07	2.18987e+07	2.32256e+07	2.45915e+07	2.59965e+07	2.74404e+07	2.89234e+07	3.04455e+07	3.20065e+07	3.36066e+07	3.52457e+07	3.69238e+07	3.8641e+07	4.03972e+07	4.21924e+07	4.40266e+07
79.5		4940.44	44464	123511	242082	400176	597794	834935	1.1116e+06	1.42779e+06	1.7835e+06	2.17874e+06	2.61349e+06	3.08778e+06	3.60158e+06	4.15491e+06	4.74777e+06	5.38014e+06	6.05204e+06	6.76347e+06	7.51441e+06	8.30488e+06	9.13488e+06	1.00044e+07	1.09134e+07	1.1862e+07	1.28501e+07	1.38777e+07	1.49448e+07	1.60515e+07	1.71977e+07	1.83834e+07	1.96086e+07	2.08734e+07	2.21776e+07	2.35214e+07	2.49048e+07	2.63276e+07	2.779e+07	2.92919e+07	3.08333e+07	3.24142e+07	3.40347e+07	3.56947e+07	3.73942e+07	3.91332e+07	4.09118e+07	4.27299e+07	4.45875e+07
80.5		5002.59	45023.3	125065	245127	405210	605313	845437	1.12558e+06	1.44575e+06	1.80593e+06	2.20614e+06	2.64637e+06	3.12662e+06	3.64689e+06	4.20718e+06	4.80749e+06	5.44782e+06	6.12817e+06	6.84854e+06	7.60893e+06	8.40935e+06	9.24978e+06	1.01302e+07	1.10507e+07	1.20112e+07	1.30117e+07	1.40523e+07	1.51328e+07	1.62534e+07	1.7414e+07	1.86146e+07	1.98553e+07	2.11359e+07	2.24566e+07	2.38173e+07	2.5218e+07	2.66588e+07	2.81396e+07	2.96603e+07	3.12211e+07	3.2822e+07	3.44628e+07	3.61437e+07	3.78646e+07	3.96255e+07	4.14264e+07	4.32674e+07	4.51483e+07
81.5		5064.73	45582.6	126618	248172	410243	612832	855939	1.13956e+06	1.46371e+06	1.82837e+06	2.23355e+06	2.67924e+06	3.16546e+06	3.69219e+06	4.25944e+06	4.86721e+06	5.51549e+06	6.2043e+06	6.93362e+06	7.70346e+06	8.51381e+06	9.36469e+06	1.02561e+07	1.1188e+07	1.21604e+07	1.31734e+07	1.42268e+07	1.53208e+07	1.64553e+07	1.76303e+07	1.88459e+07	2.01019e+07	2.13985e+07	2.27356e+07	2.41132e+07	2.55313e+07	2.69899e+07	2.84891e+07	3.00288e+07	3.1609e+07	3.32297e+07	3.48909e+07	3.65927e+07	3.83349e+07	4.01177e+07	4.1941e+07	4.38049e+07	4.57092e+07
82.5		5126.87	46141.9	128172	251217	415277	620352	866442	1.15355e+06	1.48167e+06	1.8508e+06	2.26095e+06	2.71212e+06	3.2043e+06	3.73749e+06	4.3117e+06	4.92693e+06	5.58317e+06	6.28042e+06	7.01869e+06	7.79798e+06	8.61828e+06	9.47959e+06	1.03819e+07	1.13253e+07	1.23096e+07	1.3335e+07	1.44014e+07	1.55088e+07	1.66572e+07	1.78467e+07	1.90771e+07	2.03486e+07	2.1661e+07	2.30145e+07	2.4409e+07	2.58446e+07	2.73211e+07	2.88387e+07	3.03972e+07	3.19968e+07	3.36374e+07	3.5319e+07	3.70417e+07	3.88053e+07	4.061e+07	4.24556e+07	4.43423e+07	4.627e+07
83.5		5189.02	46701.2	129725	254262	420311	627871	876944	1.16753e+06	1.49963e+06	1.87324e+06	2.28836e+06	2.74499e+06	3.24314e+06	3.78279e+06	4.36396e+06	4.98665e+06	5.65084e+06	6.35655e+06	7.10377e+06	7.8925e+06	8.72274e+06	9.5945e+06	1.05078e+07	1.14625e+07	1.24588e+07	1.34966e+07	1.4576e+07	1.56968e+07	1.68591e+07	1.8063e+07	1.93083e+07	2.05952e+07	2.19236e+07	2.32935e+07	2.47049e+07	2.61578e+07	2.76523e+07	2.91882e+07	3.07657e+07	3.23847e+07	3.40452e+07	3.57471e+07	3.74907e+07	3.92757e+07	4.11022e+07	4.29703e+07	4.48798e+07	4.68309e+07
84.5		5251.16	47260.5	131279	257307	425344	635391	887446	1.18151e+06	1.51759e+06	1.89567e+06	2.31576e+06	2.77786e+06	3.28198e+06	3.8281e+06	4.41623e+06	5.04637e+06	5.71852e+06	6.43267e+06	7.18884e+06	7.98702e+06	8.8272e+06	9.7094e+06	1.06336e+07	1.15998e+07	1.2608e+07	1.36583e+07	1.47505e+07	1.58848e+07	1.7061e+07	1.82793e+07	1.95396e+07	2.08419e+07	2.21862e+07	2.35725e+07	2.50008e+07	2.64711e+07	2.79834e+07	2.95378e+07	3.11341e+07	3.27725e+07	3.44529e+07	3.61753e+07	3.79396e+07	3.9746e+07	4.15945e+07	4.34849e+07	4.54173e+07	4.73917e+07
85.5		5313.31	47819.8	132833	260352	430378	642910	897949	1.19549e+06	1.53555e+06	1.9181e+06	2.34317e+06	2.81074e+06	3.32082e+06	3.8734e+06	4.46849e+06	5.10609e+06	5.78619e+06	6.5088e+06	7.27392e+06	8.08154e+06	8.93167e+06	9.8243e+06	1.07594e+07	1.17371e+07	1.27572e+07	1.38199e+07	1.49251e+07	1.60728e+07	1.72629e+07	1.84956e+07	1.97708e+07	2.10885e+07	2.24487e+07	2.38514e+07	2.52967e+07	2.67844e+07	2.83146e+07	2.98873e+07	3.15026e+07	3.31603e+07	3.48606e+07	3.66034e+07	3.83886e+07	4.02164e+07	4.20867e+07	4.39995e+07	4.59548e+07	4.79526e+07
86.5		5375.45	48379.1	134386	263397	435411	650429	908451	1.20948e+06	1.55351e+06	1.94054e+06	2.37057e+06	2.84361e+06	3.35966e+06	3.9187e+06	4.52075e+06	5.16581e+06	5.85387e+06	6.58493e+06	7.35899e+06	8.17606e+06	9.03613e+06	9.93921e+06	1.08853e+07	1.18744e+07	1.29065e+07	1.39815e+07	1.50996e+07	1.62607e+07	1.74648e+07	1.87119e+07	2.00021e+07	2.13352e+07	2.27113e+07	2.41304e+07	2.55925e+07	2.70976e+07	2.86458e+07	3.02369e+07	3.1871e+07	3.35482e+07	3.52683e+07	3.70315e+07	3.88376e+07	4.06868e+07	4.25789e+07	4.45141e+07	4.64923e+07	4.85134e+07
87.5		5437.59	48938.3	135940	266442	440445	657949	918953	1.22346e+06	1.57146e+06	1.96297e+06	2.39798e+06	2.87649e+06	3.3985e+06	3.96401e+06	4.57302e+06	5.22553e+06	5.92154e+06	6.66105e+06	7.44407e+06	8.27058e+06	9.1406e+06	1.00541e+07	1.10111e+07	1.20116e+07	1.30557e+07	1.41432e+07	1.52742e+07	1.64487e+07	1.76667e+07	1.89283e+07	2.02333e+07	2.15818e+07	2.29738e+07	2.44094e+07	2.58884e+07	2.74109e+07	2.89769e+07	3.05865e+07	3.22395e+07	3.3936e+07	3.56761e+07	3.74596e+07	3.92866e+07	4.11572e+07	4.30712e+07	4.50287e+07	4.70298e+07	4.90743e+07
88.5		5499.74	49497.6	137493	269487	445479	665468	929456	1.23744e+06	1.58942e+06	1.98541e+06	2.42538e+06	2.90936e+06	3.43734e+06	4.00931e+06	4.62528e+06	5.28525e+06	5.98921e+06	6.73718e+06	7.52914e+06	8.3651e+06	9.24506e+06	1.0169e+07	1.1137e+07	1.21489e+07	1.32049e+07	1.43048e+07	1.54488e+07	1.66367e+07	1.78686e+07	1.91446e+07	2.04645e+07	2.18285e+07	2.32364e+07	2.46883e+07	2.61843e+07	2.77242e+07	2.93081e+07	3.0936e+07	3.26079e+07	3.43239e+07	3.60838e+07	3.78877e+07	3.97356e+07	4.16275e+07	4.35634e+07	4.55433e+07	4.75672e+07	4.96351e+07
89.5		5561.88	50056.9	139047	272532	450512	672988	939958	1.25142e+06	1.60738e+06	2.00784e+06	2.45279e+06	2.94224e+06	3.47618e+06	4.05461e+06	4.67754e+06	5.34497e+06	6.05689e+06	6.81331e+06	7.61422e+06	8.45962e+06	9.34952e+06	1.02839e+07	1.12628e+07	1.22862e+07	1.33541e+07	1.44665e+07	1.56233e+07	1.68247e+07	1.80706e+07	1.93609e+07	2.06958e+07	2.20751e+07	2.3499e+07	2.49673e+07	2.64801e+07	2.80374e+07	2.96393e+07	3.12856e+07	3.29764e+07	3.47117e+07	3.64915e+07	3.83158e+07	4.01846e+07	4.20979e+07	4.40557e+07	4.60579e+07	4.81047e+07	5.0196e+07
90.5		5624.03	50616.2	140601	275577	455546	680507	950460	1.26541e+06	1.62534e+06	2.03027e+06	2.4802e+06	2.97511e+06	3.51502e+06	4.09992e+06	4.72981e+06	5.40469e+06	6.12456e+06	6.88943e+06	7.69929e+06	8.55414e+06	9.45399e+06	1.03988e+07	1.13887e+07	1.24235e+07	1.35033e+07	1.46281e+07	1.57979e+07	1.70127e+07	1.82725e+07	1.95772e+07	2.0927e+07	2.23218e+07	2.37615e+07	2.52463e+07	2.6776e+07	2.83507e+07	2.99704e+07	3.16351e+07	3.33449e+07	3.50995e+07	3.68992e+07	3.87439e+07	4.06336e+07	4.25683e+07	4.45479e+07	4.65726e+07	4.86422e+07	5.07568e+07
91.5		5686.17	51175.5	142154	278622	460580	688027	960963	1.27939e+06	1.6433e+06	2.05271e+06	2.5076e+06	3.00798e+06	3.55386e+06	4.14522e+06	4.78207e+06	5.46441e+06	6.19224e+06	6.96556e+06	7.78437e+06	8.64866e+06	9.55845e+06	1.05137e+07	1.15145e+07	1.25607e+07	1.36525e+07	1.47897e+07	1.59725e+07	1.72007e+07	1.84744e+07	1.97936e+07	2.11582e+07	2.25684e+07	2.40241e+07	2.55252e+07	2.70719e+07	2.8664e+07	3.03016e+07	3.19847e+07	3.37133e+07	3.54874e+07	3.7307e+07	3.9172e+07	4.10826e+07	4.30386e+07	4.50402e+07	4.70872e+07	4.91797e+07	5.13177e+07
92.5		5748.31	51734.8	143708	281667	465613	695546	971465	1.29337e+06	1.66126e+06	2.07514e+06	2.53501e+06	3.04086e+06	3.5927e+06	4.19052e+06	4.83433e+06	5.52413e+06	6.25991e+06	7.04168e+06	7.86944e+06	8.74319e+06	9.66292e+06	1.06286e+07	1.16403e+07	1.2698e+07	1.38017e+07	1.49514e+07	1.6147e+07	1.73886e+07	1.86763e+07	2.00099e+07	2.13895e+07	2.28151e+07	2.42866e+07	2.58042e+07	2.73677e+07	2.89773e+07	3.06328e+07	3.23343e+07	3.40818e+07	3.58752e+07	3.77147e+07	3.96001e+07	4.15316e+07	4.3509e+07	4.55324e+07	4.76018e+07	4.97172e+07	5.18785e+07
93.5		5810.46	52294.1	145261	284712	470647	703065	981967	1.30735e+06	1.67922e+06	2.09758e+06	2.56241e+06	3.07373e+06	3.63154e+06	4.23582e+06	4.8866e+06	5.58385e+06	6.32759e+06	7.11781e+06	7.95452e+06	8.83771e+06	9.76738e+06	1.07435e+07	1.17662e+07	1.28353e+07	1.39509e+07	1.5113e+07	1.63216e+07	1.75766e+07	1.88782e+07	2.02262e+07	2.16207e+07	2.30617e+07	2.45492e+07	2.60831e+07	2.76636e+07	2.92905e+07	3.09639e+07	3.26838e+07	3.44502e+07	3.62631e+07	3.81224e+07	4.00282e+07	4.19806e+07	4.39794e+07	4.60246e+07	4.81164e+07	5.02547e+07	5.24394e+07
94.5		5872.6	52853.4	146815	287757	475681	710585	992470	1.32134e+06	1.69718e+06	2.12001e+06	2.58982e+06	3.10661e+06	3.67038e+06	4.28113e+06	4.93886e+06	5.64357e+06	6.39526e+06	7.19394e+06	8.03959e+06	8.93223e+06	9.87184e+06	1.08584e+07	1.1892e+07	1.29726e+07	1.41001e+07	1.52746e+07	1.64961e+07	1.77646e+07	1.90801e+07	2.04425e+07	2.1852e+07	2.33084e+07	2.48117e+07	2.63621e+07	2.79595e+07	2.96038e+07	3.12951e+07	3.30334e+07	3.48187e+07	3.66509e+07	3.85301e+07	4.04564e+07	4.24295e+07	4.44497e+07	4.65169e+07	4.8631e+07	5.07921e+07	5.30002e+07
95.5		5934.75	53412.7	148369	290803	480714	718104	1.00297e+06	1.33532e+06	1.71514e+06	2.14244e+06	2.61722e+06	3.13948e+06	3.70922e+06	4.32643e+06	4.99112e+06	5.70329e+06	6.46294e+06	7.27006e+06	8.12467e+06	9.02675e+06	9.97631e+06	1.09733e+07	1.20179e+07	1.31099e+07	1.42493e+07	1.54363e+07	1.66707e+07	1.79526e+07	1.9282e+07	2.06588e+07	2.20832e+07	2.3555e+07	2.50743e+07	2.66411e+07	2.82553e+07	2.99171e+07	3.16263e+07	3.33829e+07	3.51871e+07	3.70387e+07	3.89379e+07	4.08845e+07	4.28785e+07	4.49201e+07	4.70091e+07	4.91456e+07	5.13296e+07	5.35611e+07
96.5		5996.89	53972	149922	293848	485748	725624	1.01347e+06	1.3493e+06	1.7331e+06	2.16488e+06	2.64463e+06	3.17235e+06	3.74806e+06	4.37173e+06	5.04338e+06	5.76301e+06	6.53061e+06	7.34619e+06	8.20974e+06	9.12127e+06	1.00808e+07	1.10882e+07	1.21437e+07	1.32471e+07	1.43985e+07	1.55979e+07	1.68453e+07	1.81406e+07	1.94839e+07	2.08752e+07	2.23144e+07	2.38017e+07	2.53369e+07	2.692e+07	2.85512e+07	3.02303e+07	3.19574e+07	3.37325e+07	3.55556e+07	3.74266e+07	3.93456e+07	4.13126e+07	4.33275e+07	4.53905e+07	4.75014e+07	4.96602e+07	5.18671e+07	5.41219e+07
97.5		6059.03	54531.3	151476	296893	490782	733143	1.02398e+06	1.36328e+06	1.75106e+06	2.18731e+06	2.67203e+06	3.20523e+06	3.7869e+06	4.41704e+06	5.09565e+06	5.82273e+06	6.59829e+06	7.42232e+06	8.29482e+06	9.21579e+06	1.01852e+07	1.12032e+07	1.22695e+07	1.33844e+07	1.45477e+07	1.57595e+07	1.70198e+07	1.83286e+07	1.96858e+07	2.10915e+07	2.25457e+07	2.40483e+07	2.55994e+07	2.7199e+07	2.88471e+07	3.05436e+07	3.22886e+07	3.40821e+07	3.5924e+07	3.78144e+07	3.97533e+07	4.17407e+07	4.37765e+07	4.58608e+07	4.79936e+07	5.01749e+07	5.24046e+07	5.46828e+07
98.5		6121.18	55090.6	153029	299938	495815	740662	1.03448e+06	1.37726e+06	1.76902e+06	2.20975e+06	2.69944e+06	3.2381e+06	3.82574e+06	4.46234e+06	5.14791e+06	5.88245e+06	6.66596e+06	7.49844e+06	8.37989e+06	9.31031e+06	1.02897e+07	1.13181e+07	1.23954e+07	1.35217e+07	1.46969e+07	1.59212e+07	1.71944e+07	1.85166e+07	1.98877e+07	2.13078e+07	2.27769e+07	2.4295e+07	2.5862e+07	2.7478e+07	2.91429e+07	3.08569e+07	3.26198e+07	3.44316e+07	3.62925e+07	3.82023e+07	4.0161e+07	4.21688e+07	4.42255e+07	4.63312e+07	4.84858e+07	5.06895e+07	5.29421e+07	5.52436e+07
99.5		6183.32	55649.9	154583	302983	500849	748182	1.04498e+06	1.39125e+06	1.78698e+06	2.23218e+06	2.72684e+06	3.27098e+06	3.86458e+06	4.50764e+06	5.20017e+06	5.94217e+06	6.73364e+06	7.57457e+06	8.46497e+06	9.40483e+06	1.03942e+07	1.1433e+07	1.25212e+07	1.3659e+07	1.48462e+07	1.60828e+07	1.7369e+07	1.87045e+07	2.00896e+07	2.15241e+07	2.30081e+07	2.45416e+07	2.61245e+07	2.77569e+07	2.94388e+07	3.11701e+07	3.29509e+07	3.47812e+07	3.66609e+07	3.85901e+07	4.05688e+07	4.25969e+07	4.46745e+07	4.68016e+07	4.89781e+07	5.12041e+07	5.34795e+07	5.58045e+07
100.5		6245.47	56209.2	156137	306028	505883	755701	1.05548e+06	1.40523e+06	1.80494e+06	2.25461e+06	2.75425e+06	3.30385e+06	3.90342e+06	4.55294e+06	5.25244e+06	6.00189e+06	6.80131e+06	7.6507e+06	8.55004e+06	9.49935e+06	1.04986e+07	1.15479e+07	1.26471e+07	1.37962e+07	1.49954e+07	1.62445e+07	1.75435e+07	1.88925e+07	2.02915e+07	2.17405e+07	2.32394e+07	2.47883e+07	2.63871e+07	2.80359e+07	2.97347e+07	3.14834e+07	3.32821e+07	3.51307e+07	3.70294e+07	3.89779e+07	4.09765e+07	4.3025e+07	4.51235e+07	4.72719e+07	4.94703e+07	5.17187e+07	5.4017e+07	5.63653e+07
[truncated: 53 more columns]

## Sheet: RODS-CALCULATIONS
	Width	0.5	1.5	2.5	3.5	4.5	5.5	6.5	7.5	8.5	9.5	10.5	11.5	12.5	13.5	14.5	15.5	16.5	17.5	18.5	19.5	20.5	21.5	22.5	23.5	24.5	25.5	26.5	27.5	28.5	29.5	30.5	31.5	32.5	33.5	34.5	35.5	36.5	37.5	38.5	39.5	40.5	41.5	42.5	43.5	44.5	45.5	46.5	47.5
Length
0.5		0	0	0	0	0	0	0	0	0	0	0	0	0	0	0	0	0	0	0	0	0	0	0	0	0	0	0	0	0	0	0	0	0	0	0	0	0	0	0	0	0	0	0	0	0	0	0	0
1.5		0	0	0	0	0	0	0	0	0	0	0	0	0	0	0	0	0	0	0	0	0	0	0	0	0	0	0	0	0	0	0	0	0	0	0	0	0	0	0	0	0	0	0	0	0	0	0	0
2.5		0	0	0	0	0	0	0	0	0	0	0	0	0	0	0	0	0	0	0	0	0	0	0	0	0	0	0	0	0	0	0	0	0	0	0	0	0	0	0	0	0	0	0	0	0	0	0	0
3.5		0	0	0	0	0	0	0	0	0	0	0	0	0	0	0	0	0	0	0	0	0	0	0	0	0	0	0	0	0	0	0	0	0	0	0	0	0	0	0	0	0	0	0	0	0	0	0	0
4.5		0	0	0	0	0	0	0	0	0	0	0	0	0	0	0	0	0	0	0	0	0	0	0	0	0	0	0	0	0	0	0	0	0	0	0	0	0	0	0	0	0	0	0	0	0	0	0	0
5.5		0	0	0	0	0	0	0	0	0	0	0	0	0	0	0	0	0	0	0	0	0	0	0	0	0	0	0	0	0	0	0	0	0	0	0	0	0	0	0	0	0	0	0	0	0	0	0	0
6.5		0	0	0	0	0	0	0	0	0	0	0	0	0	0	0	0	0	0	0	0	0	0	0	0	0	0	0	0	0	0	0	0	0	0	0	0	0	0	0	0	0	0	0	0	0	0	0	0
7.5		0	0	0	0	0	0	0	0	0	0	0	0	0	0	0	0	0	0	0	0	0	0	0	0	0	0	0	0	0	0	0	0	0	0	0	0	0	0	0	0	0	0	0	0	0	0	0	0
8.5		0	0	0	0	0	0	0	0	0	0	0	0	0	0	0	0	0	0	0	0	0	0	0	0	0	0	0	0	0	0	0	0	0	0	0	0	0	0	0	0	0	0	0	0	0	0	0	0
9.5		0	0	0	0	0	0	0	0	0	0	0	0	0	0	0	0	0	0	0	0	0	0	0	0	0	0	0	0	0	0	0	0	0	0	0	0	0	0	0	0	0	0	0	0	0	0	0	0
10.5		0	0	0	0	0	0	0	0	0	0	0	0	0	0	0	0	0	0	0	0	0	0	0	0	0	0	0	0	0	0	0	0	0	0	0	0	0	0	0	0	0	0	0	0	0	0	0	0
11.5		0	0	0	0	0	0	0	0	0	0	0	0	0	0	0	0	0	0	0	0	0	0	0	0	0	0	0	0	0	0	0	0	0	0	0	0	0	0	0	0	0	0	0	0	0	0	0	0
12.5		0	0	0	0	0	0	0	0	0	0	0	0	0	0	0	0	0	0	0	0	0	0	0	0	0	0	0	0	0	0	0	0	0	0	0	0	0	0	0	0	0	0	0	0	0	0	0	0
13.5		0	0	0	0	0	0	0	0	0	0	0	0	0	0	0	0	0	0	0	0	0	0	0	0	0	0	0	0	0	0	0	0	0	0	0	0	0	0	0	0	0	0	0	0	0	0	0	0
14.5		0	0	0	0	0	0	0	0	0	0	0	0	0	0	0	0	0	0	0	0	0	0	0	0	0	0	0	0	0	0	0	0	0	0	0	0	0	0	0	0	0	0	0	0	0	0	0	0
15.5		0	0	0	0	0	0	0	0	0	0	0	0	0	0	0	0	0	0	0	0	0	0	0	0	0	0	0	0	0	0	0	0	0	0	0	0	0	0	0	0	0	0	0	0	0	0	0	0
16.5		0	0	0	0	0	0	0	0	0	0	0	0	0	0	0	0	0	0	0	0	0	0	0	0	0	0	0	0	0	0	0	0	0	0	0	0	0	0	0	0	0	0	0	0	0	0	0	0
17.5		0	0	0	0	0	0	0	0	0	0	0	0	0	0	0	0	0	0	0	0	0	0	0	0	0	0	0	0	0	0	0	0	0	0	0	0	0	0	0	0	0	0	0	0	0	0	0	0
18.5		0	0	0	0	0	0	0	0	0	0	0	0	0	0	0	0	0	0	0	0	0	0	0	0	0	0	0	0	0	0	0	0	0	0	0	0	0	0	0	0	0	0	0	0	0	0	0	0
19.5		0	0	0	0	0	0	0	0	0	0	0	0	0	0	0	0	0	0	0	0	0	0	0	0	0	0	0	0	0	0	0	0	0	0	0	0	0	0	0	0	0	0	0	0	0	0	0	0
20.5		0	0	0	0	0	0	0	0	0	0	0	0	0	0	0	0	0	0	0	0	0	0	0	0	0	0	0	0	0	0	0	0	0	0	0	0	0	0	0	0	0	0	0	0	0	0	0	0
21.5		0	0	0	0	0	0	0	0	0	0	0	0	0	0	0	0	0	0	0	0	0	0	0	0	0	0	0	0	0	0	0	0	0	0	0	0	0	0	0	0	0	0	0	0	0	0	0	0
22.5		0	0	0	0	0	0	0	0	0	0	0	0	0	0	0	0	0	0	0	0	0	0	0	0	0	0	0	0	0	0	0	0	0	0	0	0	0	0	0	0	0	0	0	0	0	0	0	0
23.5		0	0	0	0	0	0	0	0	0	0	0	0	0	0	0	0	0	0	0	0	0	0	0	0	0	0	0	0	0	0	0	0	0	0	0	0	0	0	0	0	0	0	0	0	0	0	0	0
24.5		0	0	0	0	0	0	0	0	0	0	0	0	0	0	0	0	0	0	0	0	0	0	0	0	0	0	0	0	0	0	0	0	0	0	0	0	0	0	0	0	0	0	0	0	0	0	0	0
25.5		0	0	0	0	0	0	0	0	0	0	0	0	0	0	0	0	0	0	0	0	0	0	0	0	0	0	0	0	0	0	0	0	0	0	0	0	0	0	0	0	0	0	0	0	0	0	0	0
26.5		0	0	0	0	0	0	0	0	0	0	0	0	0	0	0	0	0	0	0	0	0	0	0	0	0	0	0	0	0	0	0	0	0	0	0	0	0	0	0	0	0	0	0	0	0	0	0	0
27.5		0	0	0	0	0	0	0	0	0	0	0	0	0	0	0	0	0	0	0	0	0	0	0	0	0	0	0	0	0	0	0	0	0	0	0	0	0	0	0	0	0	0	0	0	0	0	0	0
28.5		0	0	0	0	0	0	0	0	0	0	0	0	0	0	0	0	0	0	0	0	0	0	0	0	0	0	0	0	0	0	0	0	0	0	0	0	0	0	0	0	0	0	0	0	0	0	0	0
29.5		0	0	0	0	0	0	0	0	0	0	0	0	0	0	0	0	0	0	0	0	0	0	0	0	0	0	0	0	0	0	0	0	0	0	0	0	0	0	0	0	0	0	0	0	0	0	0	0
30.5		0	0	0	0	0	0	0	0	0	0	0	0	0	0	0	0	0	0	0	0	0	0	0	0	0	0	0	0	0	0	0	0	0	0	0	0	0	0	0	0	0	0	0	0	0	0	0	0
31.5		0	0	0	0	0	0	0	0	0	0	0	0	0	0	0	0	0	0	0	0	0	0	0	0	0	0	0	0	0	0	0	0	0	0	0	0	0	0	0	0	0	0	0	0	0	0	0	0
32.5		0	0	0	0	0	0	0	0	0	0	0	0	0	0	0	0	0	0	0	0	0	0	0	0	0	0	0	0	0	0	0	0	0	0	0	0	0	0	0	0	0	0	0	0	0	0	0	0
33.5		0	0	0	0	0	0	0	0	0	0	0	0	0	0	0	0	0	0	0	0	0	0	0	0	0	0	0	0	0	0	0	0	0	0	0	0	0	0	0	0	0	0	0	0	0	0	0	0
34.5		0	0	0	0	0	0	0	0	0	0	0	0	0	0	0	0	0	0	0	0	0	0	0	0	0	0	0	0	0	0	0	0	0	0	0	0	0	0	0	0	0	0	0	0	0	0	0	0
35.5		0	0	0	0	0	0	0	0	0	0	0	0	0	0	0	0	0	0	0	0	0	0	0	0	0	0	0	0	0	0	0	0	0	0	0	0	0	0	0	0	0	0	0	0	0	0	0	0
36.5		0	0	0	0	0	0	0	0	0	0	0	0	0	0	0	0	0	0	0	0	0	0	0	0	0	0	0	0	0	0	0	0	0	0	0	0	0	0	0	0	0	0	0	0	0	0	0	0
37.5		0	0	0	0	0	0	0	0	0	0	0	0	0	0	0	0	0	0	0	0	0	0	0	0	0	0	0	0	0	0	0	0	0	0	0	0	0	0	0	0	0	0	0	0	0	0	0	0
38.5		0	0	0	0	0	0	0	0	0	0	0	0	0	0	0	0	0	0	0	0	0	0	0	0	0	0	0	0	0	0	0	0	0	0	0	0	0	0	0	0	0	0	0	0	0	0	0	0
39.5		0	0	0	0	0	0	0	0	0	0	0	0	0	0	0	0	0	0	0	0	0	0	0	0	0	0	0	0	0	0	0	0	0	0	0	0	0	0	0	0	0	0	0	0	0	0	0	0
40.5		0	0	0	0	0	0	0	0	0	0	0	0	0	0	0	0	0	0	0	0	0	0	0	0	0	0	0	0	0	0	0	0	0	0	0	0	0	0	0	0	0	0	0	0	0	0	0	0
41.5		0	0	0	0	0	0	0	0	0	0	0	0	0	0	0	0	0	0	0	0	0	0	0	0	0	0	0	0	0	0	0	0	0	0	0	0	0	0	0	0	0	0	0	0	0	0	0	0
42.5		0	0	0	0	0	0	0	0	0	0	0	0	0	0	0	0	0	0	0	0	0	0	0	0	0	0	0	0	0	0	0	0	0	0	0	0	0	0	0	0	0	0	0	0	0	0	0	0
43.5		0	0	0	0	0	0	0	0	0	0	0	0	0	0	0	0	0	0	0	0	0	0	0	0	0	0	0	0	0	0	0	0	0	0	0	0	0	0	0	0	0	0	0	0	0	0	0	0
44.5		0	0	0	0	0	0	0	0	0	0	0	0	0	0	0	0	0	0	0	0	0	0	0	0	0	0	0	0	0	0	0	0	0	0	0	0	0	0	0	0	0	0	0	0	0	0	0	0
45.5		0	0	0	0	0	0	0	0	0	0	0	0	0	0	0	0	0	0	0	0	0	0	0	0	0	0	0	0	0	0	0	0	0	0	0	0	0	0	0	0	0	0	0	0	0	0	0	0
46.5		0	0	0	0	0	0	0	0	0	0	0	0	0	0	0	0	0	0	0	0	0	0	0	0	0	0	0	0	0	0	0	0	0	0	0	0	0	0	0	0	0	0	0	0	0	0	0	0
47.5		0	0	0	0	0	0	0	0	0	0	0	0	0	0	0	0	0	0	0	0	0	0	0	0	0	0	0	0	0	0	0	0	0	0	0	0	0	0	0	0	0	0	0	0	0	0	0	0
48.5		0	0	0	0	0	0	0	0	0	0	0	0	0	0	0	0	0	0	0	0	0	0	0	0	0	0	0	0	0	0	0	0	0	0	0	0	0	0	0	0	0	0	0	0	0	0	0	0
49.5		0	0	0	0	0	0	0	0	0	0	0	0	0	0	0	0	0	0	0	0	0	0	0	0	0	0	0	0	0	0	0	0	0	0	0	0	0	0	0	0	0	0	0	0	0	0	0	0
50.5		0	0	0	0	0	0	0	0	0	0	0	0	0	0	0	0	0	0	0	0	0	0	0	0	0	0	0	0	0	0	0	0	0	0	0	0	0	0	0	0	0	0	0	0	0	0	0	0
51.5		0	0	0	0	0	0	0	0	0	0	0	0	0	0	0	0	0	0	0	0	0	0	0	0	0	0	0	0	0	0	0	0	0	0	0	0	0	0	0	0	0	0	0	0	0	0	0	0
52.5		0	0	0	0	0	0	0	0	0	0	0	0	0	0	0	0	0	0	0	0	0	0	0	0	0	0	0	0	0	0	0	0	0	0	0	0	0	0	0	0	0	0	0	0	0	0	0	0
53.5		0	0	0	0	0	0	0	0	0	0	0	0	0	0	0	0	0	0	0	0	0	0	0	0	0	0	0	0	0	0	0	0	0	0	0	0	0	0	0	0	0	0	0	0	0	0	0	0
54.5		0	0	0	0	0	0	0	0	0	0	0	0	0	0	0	0	0	0	0	0	0	0	0	0	0	0	0	0	0	0	0	0	0	0	0	0	0	0	0	0	0	0	0	0	0	0	0	0
55.5		0	0	0	0	0	0	0	0	0	0	0	0	0	0	0	0	0	0	0	0	0	0	0	0	0	0	0	0	0	0	0	0	0	0	0	0	0	0	0	0	0	0	0	0	0	0	0	0
56.5		0	0	0	0	0	0	0	0	0	0	0	0	0	0	0	0	0	0	0	0	0	0	0	0	0	0	0	0	0	0	0	0	0	0	0	0	0	0	0	0	0	0	0	0	0	0	0	0
57.5		0	0	0	0	0	0	0	0	0	0	0	0	0	0	0	0	0	0	0	0	0	0	0	0	0	0	0	0	0	0	0	0	0	0	0	0	0	0	0	0	0	0	0	0	0	0	0	0
58.5		0	0	0	0	0	43988.6	0	0	0	0	0	0	0	0	0	0	0	0	0	0	0	0	0	0	0	0	0	0	0	0	0	0	0	0	0	0	0	0	0	0	0	0	0	0	0	0	0	0
59.5		0	0	0	0	0	44740.5	0	83195.2	0	0	0	0	0	0	0	0	0	0	0	0	0	0	0	0	0	0	0	0	0	0	0	0	0	0	0	0	0	0	0	0	0	0	0	0	0	0	0	0
60.5		0	0	0	0	0	0	127078	0	0	0	0	0	0	0	0	0	0	0	0	0	0	0	0	0	0	0	0	0	0	0	0	0	0	0	0	0	0	0	0	0	0	0	0	0	0	0	0	0
61.5		0	0	0	0	0	0	129179	0	0	0	0	0	0	0	0	0	0	0	0	0	0	0	0	0	0	0	0	0	0	0	0	0	0	0	0	0	0	0	0	0	0	0	0	0	0	0	0	0
62.5		0	0	0	0	0	0	0	87389.9	0	0	0	0	0	0	0	0	0	0	0	0	0	0	0	0	0	0	0	0	0	0	0	0	0	0	0	0	0	0	0	0	0	0	0	0	0	0	0	0
63.5		0	0	0	0	0	0	0	0	0	0	0	0	0	0	0	0	0	0	0	0	0	0	0	0	0	0	0	0	0	0	0	0	0	0	0	0	0	0	0	0	0	0	0	0	0	0	0	0
64.5		0	0	0	0	0	0	33870	0	0	0	0	0	0	0	0	0	0	0	0	0	0	0	0	0	0	0	0	0	0	0	0	0	0	0	0	0	0	0	0	0	0	0	0	0	0	0	0	0
65.5		0	0	0	0	0	0	34395.1	0	117635	0	0	0	0	0	0	0	0	0	0	0	0	0	0	0	0	0	0	0	0	0	0	0	0	0	0	0	0	0	0	0	0	0	0	0	0	0	0	0
66.5		0	0	0	0	0	0	0	0	0	0	0	0	0	0	0	0	0	0	0	0	0	0	0	0	0	0	0	0	0	0	0	0	0	0	0	0	0	0	0	0	0	0	0	0	0	0	0	0
67.5		0	0	0	0	0	0	0	0	0	0	0	0	0	0	0	0	0	0	0	0	0	0	0	0	0	0	0	0	0	0	0	0	0	0	0	0	0	0	0	0	0	0	0	0	0	0	0	0
68.5		0	0	0	0	0	0	0	0	0	0	0	0	0	0	0	0	0	0	0	0	0	0	0	0	0	0	0	0	0	0	0	0	0	0	0	0	0	0	0	0	0	0	0	0	0	0	0	0
69.5		0	0	0	0	0	0	0	0	0	0	0	0	0	0	0	0	0	0	0	0	0	0	0	0	0	0	0	0	0	0	0	0	0	0	0	0	0	0	0	0	0	0	0	0	0	0	0	0
70.5		0	0	0	0	0	0	0	0	0	0	0	0	0	0	0	0	0	0	0	0	0	0	0	0	0	0	0	0	0	0	0	0	0	0	0	0	0	0	0	0	0	0	0	0	0	0	0	0
71.5		0	0	0	0	0	0	0	0	0	0	0	0	0	0	0	0	0	0	0	0	0	0	0	0	0	0	0	0	0	0	0	0	0	0	0	0	0	0	0	0	0	0	0	0	0	0	0	0
72.5		0	0	0	0	0	0	0	0	0	0	0	0	0	0	0	0	0	0	0	0	0	0	0	0	0	0	0	0	0	0	0	0	0	0	0	0	0	0	0	0	0	0	0	0	0	0	0	0
73.5		0	0	0	0	0	0	0	0	0	0	0	0	0	0	0	0	0	0	0	0	0	0	0	0	0	0	0	0	0	0	0	0	0	0	0	0	0	0	0	0	0	0	0	0	0	0	0	0
74.5		0	0	0	0	0	0	0	0	0	0	0	0	0	0	0	0	0	0	0	0	0	0	0	0	0	0	0	0	0	0	0	0	0	0	0	0	0	0	0	0	0	0	0	0	0	0	0	0
75.5		0	0	0	0	0	0	0	0	0	0	0	0	0	0	0	0	0	0	0	0	0	0	0	0	0	0	0	0	0	0	0	0	0	0	0	0	0	0	0	0	0	0	0	0	0	0	0	0
76.5		0	0	0	0	0	0	0	0	0	0	0	0	0	0	0	0	0	0	0	0	0	0	0	0	0	0	0	0	0	0	0	0	0	0	0	0	0	0	0	0	0	0	0	0	0	0	0	0
77.5		0	0	0	0	0	0	0	0	0	0	0	0	0	0	0	0	0	0	0	0	0	0	0	0	0	0	0	0	0	0	0	0	0	0	0	0	0	0	0	0	0	0	0	0	0	0	0	0
78.5		0	0	0	0	0	0	0	0	0	0	0	0	0	0	0	0	0	0	0	0	0	0	0	0	0	0	0	0	0	0	0	0	0	0	0	0	0	0	0	0	0	0	0	0	0	0	0	0
79.5		0	0	0	0	0	0	0	0	0	0	0	0	0	0	0	0	0	0	0	0	0	0	0	0	0	0	0	0	0	0	0	0	0	0	0	0	0	0	0	0	0	0	0	0	0	0	0	0
80.5		0	0	0	0	0	0	0	0	0	0	0	0	0	0	0	0	0	0	0	0	0	0	0	0	0	0	0	0	0	0	0	0	0	0	0	0	0	0	0	0	0	0	0	0	0	0	0	0
81.5		0	0	0	0	0	0	0	0	0	0	0	0	0	0	0	0	0	0	0	0	0	0	0	0	0	0	0	0	0	0	0	0	0	0	0	0	0	0	0	0	0	0	0	0	0	0	0	0
82.5		0	0	0	0	0	0	0	0	0	0	0	0	0	0	0	0	0	0	0	0	0	0	0	0	0	0	0	0	0	0	0	0	0	0	0	0	0	0	0	0	0	0	0	0	0	0	0	0
83.5		0	0	0	0	0	0	0	0	0	0	0	0	0	0	0	0	0	0	0	0	0	0	0	0	0	0	0	0	0	0	0	0	0	0	0	0	0	0	0	0	0	0	0	0	0	0	0	0
84.5		0	0	0	0	0	0	0	0	0	0	0	0	0	0	0	0	0	0	0	0	0	0	0	0	0	0	0	0	0	0	0	0	0	0	0	0	0	0	0	0	0	0	0	0	0	0	0	0
85.5		0	0	0	0	0	0	0	0	0	0	0	0	0	0	0	0	0	0	0	0	0	0	0	0	0	0	0	0	0	0	0	0	0	0	0	0	0	0	0	0	0	0	0	0	0	0	0	0
86.5		0	0	0	0	0	0	0	0	0	0	0	0	0	0	0	0	0	0	0	0	0	0	0	0	0	0	0	0	0	0	0	0	0	0	0	0	0	0	0	0	0	0	0	0	0	0	0	0
87.5		0	0	0	0	0	0	0	0	0	0	0	0	0	0	0	0	0	0	0	0	0	0	0	0	0	0	0	0	0	0	0	0	0	0	0	0	0	0	0	0	0	0	0	0	0	0	0	0
88.5		0	0	0	0	0	0	0	0	0	0	0	0	0	0	0	0	0	0	0	0	0	0	0	0	0	0	0	0	0	0	0	0	0	0	0	0	0	0	0	0	0	0	0	0	0	0	0	0
89.5		0	0	0	0	0	0	0	0	0	0	0	0	0	0	0	0	0	0	0	0	0	0	0	0	0	0	0	0	0	0	0	0	0	0	0	0	0	0	0	0	0	0	0	0	0	0	0	0
90.5		0	0	0	0	0	0	0	0	0	0	0	0	0	0	0	0	0	0	0	0	0	0	0	0	0	0	0	0	0	0	0	0	0	0	0	0	0	0	0	0	0	0	0	0	0	0	0	0
91.5		0	0	0	0	0	0	0	0	0	0	0	0	0	0	0	0	0	0	0	0	0	0	0	0	0	0	0	0	0	0	0	0	0	0	0	0	0	0	0	0	0	0	0	0	0	0	0	0
92.5		0	0	0	0	0	0	0	0	0	0	0	0	0	0	0	0	0	0	0	0	0	0	0	0	0	0	0	0	0	0	0	0	0	0	0	0	0	0	0	0	0	0	0	0	0	0	0	0
93.5		0	0	0	0	0	0	0	0	0	0	0	0	0	0	0	0	0	0	0	0	0	0	0	0	0	0	0	0	0	0	0	0	0	0	0	0	0	0	0	0	0	0	0	0	0	0	0	0
94.5		0	0	0	0	0	0	0	0	0	0	0	0	0	0	0	0	0	0	0	0	0	0	0	0	0	0	0	0	0	0	0	0	0	0	0	0	0	0	0	0	0	0	0	0	0	0	0	0
95.5		0	0	0	0	0	0	0	0	0	0	0	0	0	0	0	0	0	0	0	0	0	0	0	0	0	0	0	0	0	0	0	0	0	0	0	0	0	0	0	0	0	0	0	0	0	0	0	0
96.5		0	0	0	0	0	0	0	0	0	0	0	0	0	0	0	0	0	0	0	0	0	0	0	0	0	0	0	0	0	0	0	0	0	0	0	0	0	0	0	0	0	0	0	0	0	0	0	0
97.5		0	0	0	0	0	0	0	0	0	0	0	0	0	0	0	0	0	0	0	0	0	0	0	0	0	0	0	0	0	0	0	0	0	0	0	0	0	0	0	0	0	0	0	0	0	0	0	0
98.5		0	0	0	0	0	0	0	0	0	0	0	0	0	0	0	0	0	0	0	0	0	0	0	0	0	0	0	0	0	0	0	0	0	0	0	0	0	0	0	0	0	0	0	0	0	0	0	0
99.5		0	0	0	0	0	0	0	0	0	0	0	0	0	0	0	0	0	0	0	0	0	0	0	0	0	0	0	0	0	0	0	0	0	0	0	0	0	0	0	0	0	0	0	0	0	0	0	0
100.5		0	0	0	0	0	0	0	0	0	0	0	0	0	0	0	0	0	0	0	0	0	0	0	0	0	0	0	0	0	0	0	0	0	0	0	0	0	0	0	0	0	0	0	0	0	0	0	0
[truncated: 53 more columns]

## Sheet: ROD SUMS
	Width	0.5	1.5	2.5	3.5	4.5	5.5	6.5	7.5	8.5	9.5	10.5	11.5	12.5	13.5	14.5	15.5	16.5	17.5	18.5	19.5	20.5	21.5	22.5	23.5	24.5	25.5	26.5	27.5	28.5	29.5	30.5	31.5	32.5	33.5	34.5	35.5	36.5	37.5	38.5	39.5	40.5	41.5	42.5	43.5	44.5	45.5	46.5	47.5
Length
0.5		0	0	0	0	0	0	0	0	0	0	0	0	0	0	0	0	0	0	0	0	0	0	0	0	0	0	0	0	0	0	0	0	0	0	0	0	0	0	0	0	0	0	0	0	0	0	0	0
1.5		0	0	0	0	0	0	0	0	0	0	0	0	0	0	0	0	0	0	0	0	0	0	0	0	0	0	0	0	0	0	0	0	0	0	0	0	0	0	0	0	0	0	0	0	0	0	0	0
2.5		0	0	0	0	0	0	0	0	0	0	0	0	0	0	0	0	0	0	0	0	0	0	0	0	0	0	0	0	0	0	0	0	0	0	0	0	0	0	0	0	0	0	0	0	0	0	0	0
3.5		0	0	0	0	0	0	0	0	0	0	0	0	0	0	0	0	0	0	0	0	0	0	0	0	0	0	0	0	0	0	0	0	0	0	0	0	0	0	0	0	0	0	0	0	0	0	0	0
4.5		0	0	0	0	0	0	0	0	0	0	0	0	0	0	0	0	0	0	0	0	0	0	0	0	0	0	0	0	0	0	0	0	0	0	0	0	0	0	0	0	0	0	0	0	0	0	0	0
5.5		0	0	0	0	0	0	0	0	0	0	0	0	0	0	0	0	0	0	0	0	0	0	0	0	0	0	0	0	0	0	0	0	0	0	0	0	0	0	0	0	0	0	0	0	0	0	0	0
6.5		0	0	0	0	0	0	0	0	0	0	0	0	0	0	0	0	0	0	0	0	0	0	0	0	0	0	0	0	0	0	0	0	0	0	0	0	0	0	0	0	0	0	0	0	0	0	0	0
7.5		0	0	0	0	0	0	0	0	0	0	0	0	0	0	0	0	0	0	0	0	0	0	0	0	0	0	0	0	0	0	0	0	0	0	0	0	0	0	0	0	0	0	0	0	0	0	0	0
8.5		0	0	0	0	0	0	0	0	0	0	0	0	0	0	0	0	0	0	0	0	0	0	0	0	0	0	0	0	0	0	0	0	0	0	0	0	0	0	0	0	0	0	0	0	0	0	0	0
9.5		0	0	0	0	0	0	0	0	0	0	0	0	0	0	0	0	0	0	0	0	0	0	0	0	0	0	0	0	0	0	0	0	0	0	0	0	0	0	0	0	0	0	0	0	0	0	0	0
10.5		0	0	0	0	0	0	0	0	0	0	0	0	0	0	0	0	0	0	0	0	0	0	0	0	0	0	0	0	0	0	0	0	0	0	0	0	0	0	0	0	0	0	0	0	0	0	0	0
11.5		0	0	0	0	0	0	0	0	0	0	0	0	0	0	0	0	0	0	0	0	0	0	0	0	0	0	0	0	0	0	0	0	0	0	0	0	0	0	0	0	0	0	0	0	0	0	0	0
12.5		0	0	0	0	0	0	0	0	0	0	0	0	0	0	0	0	0	0	0	0	0	0	0	0	0	0	0	0	0	0	0	0	0	0	0	0	0	0	0	0	0	0	0	0	0	0	0	0
13.5		0	0	0	0	0	0	0	0	0	0	0	0	0	0	0	0	0	0	0	0	0	0	0	0	0	0	0	0	0	0	0	0	0	0	0	0	0	0	0	0	0	0	0	0	0	0	0	0
14.5		0	0	0	0	0	0	0	0	0	0	0	0	0	0	0	0	0	0	0	0	0	0	0	0	0	0	0	0	0	0	0	0	0	0	0	0	0	0	0	0	0	0	0	0	0	0	0	0
15.5		0	0	0	0	0	0	0	0	0	0	0	0	0	0	0	0	0	0	0	0	0	0	0	0	0	0	0	0	0	0	0	0	0	0	0	0	0	0	0	0	0	0	0	0	0	0	0	0
16.5		0	0	0	0	0	0	0	0	0	0	0	0	0	0	0	0	0	0	0	0	0	0	0	0	0	0	0	0	0	0	0	0	0	0	0	0	0	0	0	0	0	0	0	0	0	0	0	0
17.5		0	0	0	0	0	0	0	0	0	0	0	0	0	0	0	0	0	0	0	0	0	0	0	0	0	0	0	0	0	0	0	0	0	0	0	0	0	0	0	0	0	0	0	0	0	0	0	0
18.5		0	0	0	0	0	0	0	0	0	0	0	0	0	0	0	0	0	0	0	0	0	0	0	0	0	0	0	0	0	0	0	0	0	0	0	0	0	0	0	0	0	0	0	0	0	0	0	0
19.5		0	0	0	0	0	0	0	0	0	0	0	0	0	0	0	0	0	0	0	0	0	0	0	0	0	0	0	0	0	0	0	0	0	0	0	0	0	0	0	0	0	0	0	0	0	0	0	0
20.5		0	0	0	0	0	0	0	0	0	0	0	0	0	0	0	0	0	0	0	0	0	0	0	0	0	0	0	0	0	0	0	0	0	0	0	0	0	0	0	0	0	0	0	0	0	0	0	0
21.5		0	0	0	0	0	0	0	0	0	0	0	0	0	0	0	0	0	0	0	0	0	0	0	0	0	0	0	0	0	0	0	0	0	0	0	0	0	0	0	0	0	0	0	0	0	0	0	0
22.5		0	0	0	0	0	0	0	0	0	0	0	0	0	0	0	0	0	0	0	0	0	0	0	0	0	0	0	0	0	0	0	0	0	0	0	0	0	0	0	0	0	0	0	0	0	0	0	0
23.5		0	0	0	0	0	0	0	0	0	0	0	0	0	0	0	0	0	0	0	0	0	0	0	0	0	0	0	0	0	0	0	0	0	0	0	0	0	0	0	0	0	0	0	0	0	0	0	0
24.5		0	0	0	0	0	0	0	0	0	0	0	0	0	0	0	0	0	0	0	0	0	0	0	0	0	0	0	0	0	0	0	0	0	0	0	0	0	0	0	0	0	0	0	0	0	0	0	0
25.5		0	0	0	0	0	0	0	0	0	0	0	0	0	0	0	0	0	0	0	0	0	0	0	0	0	0	0	0	0	0	0	0	0	0	0	0	0	0	0	0	0	0	0	0	0	0	0	0
26.5		0	0	0	0	0	0	0	0	0	0	0	0	0	0	0	0	0	0	0	0	0	0	0	0	0	0	0	0	0	0	0	0	0	0	0	0	0	0	0	0	0	0	0	0	0	0	0	0
27.5		0	0	0	0	0	0	0	0	0	0	0	0	0	0	0	0	0	0	0	0	0	0	0	0	0	0	0	0	0	0	0	0	0	0	0	0	0	0	0	0	0	0	0	0	0	0	0	0
28.5		0	0	0	0	0	0	0	0	0	0	0	0	0	0	0	0	0	0	0	0	0	0	0	0	0	0	0	0	0	0	0	0	0	0	0	0	0	0	0	0	0	0	0	0	0	0	0	0
29.5		0	0	0	0	0	0	0	0	0	0	0	0	0	0	0	0	0	0	0	0	0	0	0	0	0	0	0	0	0	0	0	0	0	0	0	0	0	0	0	0	0	0	0	0	0	0	0	0
30.5		0	0	0	0	0	0	0	0	0	0	0	0	0	0	0	0	0	0	0	0	0	0	0	0	0	0	0	0	0	0	0	0	0	0	0	0	0	0	0	0	0	0	0	0	0	0	0	0
31.5		0	0	0	0	0	0	0	0	0	0	0	0	0	0	0	0	0	0	0	0	0	0	0	0	0	0	0	0	0	0	0	0	0	0	0	0	0	0	0	0	0	0	0	0	0	0	0	0
32.5		0	0	0	0	0	0	0	0	0	0	0	0	0	0	0	0	0	0	0	0	0	0	0	0	0	0	0	0	0	0	0	0	0	0	0	0	0	0	0	0	0	0	0	0	0	0	0	0
33.5		0	0	0	0	0	0	0	0	0	0	0	0	0	0	0	0	0	0	0	0	0	0	0	0	0	0	0	0	0	0	0	0	0	0	0	0	0	0	0	0	0	0	0	0	0	0	0	0
34.5		0	0	0	0	0	0	0	0	0	0	0	0	0	0	0	0	0	0	0	0	0	0	0	0	0	0	0	0	0	0	0	0	0	0	0	0	0	0	0	0	0	0	0	0	0	0	0	0
35.5		0	0	0	0	0	0	0	0	0	0	0	0	0	0	0	0	0	0	0	0	0	0	0	0	0	0	0	0	0	0	0	0	0	0	0	0	0	0	0	0	0	0	0	0	0	0	0	0
36.5		0	0	0	0	0	0	0	0	0	0	0	0	0	0	0	0	0	0	0	0	0	0	0	0	0	0	0	0	0	0	0	0	0	0	0	0	0	0	0	0	0	0	0	0	0	0	0	0
37.5		0	0	0	0	0	0	0	0	0	0	0	0	0	0	0	0	0	0	0	0	0	0	0	0	0	0	0	0	0	0	0	0	0	0	0	0	0	0	0	0	0	0	0	0	0	0	0	0
38.5		0	0	0	0	0	0	0	0	0	0	0	0	0	0	0	0	0	0	0	0	0	0	0	0	0	0	0	0	0	0	0	0	0	0	0	0	0	0	0	0	0	0	0	0	0	0	0	0
39.5		0	0	0	0	0	0	0	0	0	0	0	0	0	0	0	0	0	0	0	0	0	0	0	0	0	0	0	0	0	0	0	0	0	0	0	0	0	0	0	0	0	0	0	0	0	0	0	0
40.5		0	0	0	0	0	0	0	0	0	0	0	0	0	0	0	0	0	0	0	0	0	0	0	0	0	0	0	0	0	0	0	0	0	0	0	0	0	0	0	0	0	0	0	0	0	0	0	0
41.5		0	0	0	0	0	0	0	0	0	0	0	0	0	0	0	0	0	0	0	0	0	0	0	0	0	0	0	0	0	0	0	0	0	0	0	0	0	0	0	0	0	0	0	0	0	0	0	0
42.5		0	0	0	0	0	0	0	0	0	0	0	0	0	0	0	0	0	0	0	0	0	0	0	0	0	0	0	0	0	0	0	0	0	0	0	0	0	0	0	0	0	0	0	0	0	0	0	0
43.5		0	0	0	0	0	0	0	0	0	0	0	0	0	0	0	0	0	0	0	0	0	0	0	0	0	0	0	0	0	0	0	0	0	0	0	0	0	0	0	0	0	0	0	0	0	0	0	0
44.5		0	0	0	0	0	0	0	0	0	0	0	0	0	0	0	0	0	0	0	0	0	0	0	0	0	0	0	0	0	0	0	0	0	0	0	0	0	0	0	0	0	0	0	0	0	0	0	0
45.5		0	0	0	0	0	0	0	0	0	0	0	0	0	0	0	0	0	0	0	0	0	0	0	0	0	0	0	0	0	0	0	0	0	0	0	0	0	0	0	0	0	0	0	0	0	0	0	0
46.5		0	0	0	0	0	0	0	0	0	0	0	0	0	0	0	0	0	0	0	0	0	0	0	0	0	0	0	0	0	0	0	0	0	0	0	0	0	0	0	0	0	0	0	0	0	0	0	0
47.5		0	0	0	0	0	0	0	0	0	0	0	0	0	0	0	0	0	0	0	0	0	0	0	0	0	0	0	0	0	0	0	0	0	0	0	0	0	0	0	0	0	0	0	0	0	0	0	0
48.5		0	0	0	0	0	0	0	0	0	0	0	0	0	0	0	0	0	0	0	0	0	0	0	0	0	0	0	0	0	0	0	0	0	0	0	0	0	0	0	0	0	0	0	0	0	0	0	0
49.5		0	0	0	0	0	0	0	0	0	0	0	0	0	0	0	0	0	0	0	0	0	0	0	0	0	0	0	0	0	0	0	0	0	0	0	0	0	0	0	0	0	0	0	0	0	0	0	0
50.5		0	0	0	0	0	0	0	0	0	0	0	0	0	0	0	0	0	0	0	0	0	0	0	0	0	0	0	0	0	0	0	0	0	0	0	0	0	0	0	0	0	0	0	0	0	0	0	0
51.5		0	0	0	0	0	0	0	0	0	0	0	0	0	0	0	0	0	0	0	0	0	0	0	0	0	0	0	0	0	0	0	0	0	0	0	0	0	0	0	0	0	0	0	0	0	0	0	0
52.5		0	0	0	0	0	0	0	0	0	0	0	0	0	0	0	0	0	0	0	0	0	0	0	0	0	0	0	0	0	0	0	0	0	0	0	0	0	0	0	0	0	0	0	0	0	0	0	0
53.5		0	0	0	0	0	0	0	0	0	0	0	0	0	0	0	0	0	0	0	0	0	0	0	0	0	0	0	0	0	0	0	0	0	0	0	0	0	0	0	0	0	0	0	0	0	0	0	0
54.5		0	0	0	0	0	0	0	0	0	0	0	0	0	0	0	0	0	0	0	0	0	0	0	0	0	0	0	0	0	0	0	0	0	0	0	0	0	0	0	0	0	0	0	0	0	0	0	0
55.5		0	0	0	0	0	0	0	0	0	0	0	0	0	0	0	0	0	0	0	0	0	0	0	0	0	0	0	0	0	0	0	0	0	0	0	0	0	0	0	0	0	0	0	0	0	0	0	0
56.5		0	0	0	0	0	0	0	0	0	0	0	0	0	0	0	0	0	0	0	0	0	0	0	0	0	0	0	0	0	0	0	0	0	0	0	0	0	0	0	0	0	0	0	0	0	0	0	0
57.5		0	0	0	0	0	0	0	0	0	0	0	0	0	0	0	0	0	0	0	0	0	0	0	0	0	0	0	0	0	0	0	0	0	0	0	0	0	0	0	0	0	0	0	0	0	0	0	0
58.5		0	0	0	0	0	175954	0	0	0	0	0	0	0	0	0	0	0	0	0	0	0	0	0	0	0	0	0	0	0	0	0	0	0	0	0	0	0	0	0	0	0	0	0	0	0	0	0	0
59.5		0	0	0	0	0	178962	0	332781	0	0	0	0	0	0	0	0	0	0	0	0	0	0	0	0	0	0	0	0	0	0	0	0	0	0	0	0	0	0	0	0	0	0	0	0	0	0	0	0
60.5		0	0	0	0	0	0	508313	0	0	0	0	0	0	0	0	0	0	0	0	0	0	0	0	0	0	0	0	0	0	0	0	0	0	0	0	0	0	0	0	0	0	0	0	0	0	0	0	0
61.5		0	0	0	0	0	0	516714	0	0	0	0	0	0	0	0	0	0	0	0	0	0	0	0	0	0	0	0	0	0	0	0	0	0	0	0	0	0	0	0	0	0	0	0	0	0	0	0	0
62.5		0	0	0	0	0	0	0	349560	0	0	0	0	0	0	0	0	0	0	0	0	0	0	0	0	0	0	0	0	0	0	0	0	0	0	0	0	0	0	0	0	0	0	0	0	0	0	0	0
63.5		0	0	0	0	0	0	0	0	0	0	0	0	0	0	0	0	0	0	0	0	0	0	0	0	0	0	0	0	0	0	0	0	0	0	0	0	0	0	0	0	0	0	0	0	0	0	0	0
64.5		0	0	0	0	0	0	135480	0	0	0	0	0	0	0	0	0	0	0	0	0	0	0	0	0	0	0	0	0	0	0	0	0	0	0	0	0	0	0	0	0	0	0	0	0	0	0	0	0
65.5		0	0	0	0	0	0	137580	0	470541	0	0	0	0	0	0	0	0	0	0	0	0	0	0	0	0	0	0	0	0	0	0	0	0	0	0	0	0	0	0	0	0	0	0	0	0	0	0	0
66.5		0	0	0	0	0	0	0	0	0	0	0	0	0	0	0	0	0	0	0	0	0	0	0	0	0	0	0	0	0	0	0	0	0	0	0	0	0	0	0	0	0	0	0	0	0	0	0	0
67.5		0	0	0	0	0	0	0	0	0	0	0	0	0	0	0	0	0	0	0	0	0	0	0	0	0	0	0	0	0	0	0	0	0	0	0	0	0	0	0	0	0	0	0	0	0	0	0	0
68.5		0	0	0	0	0	0	0	0	0	0	0	0	0	0	0	0	0	0	0	0	0	0	0	0	0	0	0	0	0	0	0	0	0	0	0	0	0	0	0	0	0	0	0	0	0	0	0	0
69.5		0	0	0	0	0	0	0	0	0	0	0	0	0	0	0	0	0	0	0	0	0	0	0	0	0	0	0	0	0	0	0	0	0	0	0	0	0	0	0	0	0	0	0	0	0	0	0	0
70.5		0	0	0	0	0	0	0	0	0	0	0	0	0	0	0	0	0	0	0	0	0	0	0	0	0	0	0	0	0	0	0	0	0	0	0	0	0	0	0	0	0	0	0	0	0	0	0	0
71.5		0	0	0	0	0	0	0	0	0	0	0	0	0	0	0	0	0	0	0	0	0	0	0	0	0	0	0	0	0	0	0	0	0	0	0	0	0	0	0	0	0	0	0	0	0	0	0	0
72.5		0	0	0	0	0	0	0	0	0	0	0	0	0	0	0	0	0	0	0	0	0	0	0	0	0	0	0	0	0	0	0	0	0	0	0	0	0	0	0	0	0	0	0	0	0	0	0	0
73.5		0	0	0	0	0	0	0	0	0	0	0	0	0	0	0	0	0	0	0	0	0	0	0	0	0	0	0	0	0	0	0	0	0	0	0	0	0	0	0	0	0	0	0	0	0	0	0	0
74.5		0	0	0	0	0	0	0	0	0	0	0	0	0	0	0	0	0	0	0	0	0	0	0	0	0	0	0	0	0	0	0	0	0	0	0	0	0	0	0	0	0	0	0	0	0	0	0	0
75.5		0	0	0	0	0	0	0	0	0	0	0	0	0	0	0	0	0	0	0	0	0	0	0	0	0	0	0	0	0	0	0	0	0	0	0	0	0	0	0	0	0	0	0	0	0	0	0	0
76.5		0	0	0	0	0	0	0	0	0	0	0	0	0	0	0	0	0	0	0	0	0	0	0	0	0	0	0	0	0	0	0	0	0	0	0	0	0	0	0	0	0	0	0	0	0	0	0	0
77.5		0	0	0	0	0	0	0	0	0	0	0	0	0	0	0	0	0	0	0	0	0	0	0	0	0	0	0	0	0	0	0	0	0	0	0	0	0	0	0	0	0	0	0	0	0	0	0	0
78.5		0	0	0	0	0	0	0	0	0	0	0	0	0	0	0	0	0	0	0	0	0	0	0	0	0	0	0	0	0	0	0	0	0	0	0	0	0	0	0	0	0	0	0	0	0	0	0	0
79.5		0	0	0	0	0	0	0	0	0	0	0	0	0	0	0	0	0	0	0	0	0	0	0	0	0	0	0	0	0	0	0	0	0	0	0	0	0	0	0	0	0	0	0	0	0	0	0	0
80.5		0	0	0	0	0	0	0	0	0	0	0	0	0	0	0	0	0	0	0	0	0	0	0	0	0	0	0	0	0	0	0	0	0	0	0	0	0	0	0	0	0	0	0	0	0	0	0	0
81.5		0	0	0	0	0	0	0	0	0	0	0	0	0	0	0	0	0	0	0	0	0	0	0	0	0	0	0	0	0	0	0	0	0	0	0	0	0	0	0	0	0	0	0	0	0	0	0	0
82.5		0	0	0	0	0	0	0	0	0	0	0	0	0	0	0	0	0	0	0	0	0	0	0	0	0	0	0	0	0	0	0	0	0	0	0	0	0	0	0	0	0	0	0	0	0	0	0	0
83.5		0	0	0	0	0	0	0	0	0	0	0	0	0	0	0	0	0	0	0	0	0	0	0	0	0	0	0	0	0	0	0	0	0	0	0	0	0	0	0	0	0	0	0	0	0	0	0	0
84.5		0	0	0	0	0	0	0	0	0	0	0	0	0	0	0	0	0	0	0	0	0	0	0	0	0	0	0	0	0	0	0	0	0	0	0	0	0	0	0	0	0	0	0	0	0	0	0	0
85.5		0	0	0	0	0	0	0	0	0	0	0	0	0	0	0	0	0	0	0	0	0	0	0	0	0	0	0	0	0	0	0	0	0	0	0	0	0	0	0	0	0	0	0	0	0	0	0	0
86.5		0	0	0	0	0	0	0	0	0	0	0	0	0	0	0	0	0	0	0	0	0	0	0	0	0	0	0	0	0	0	0	0	0	0	0	0	0	0	0	0	0	0	0	0	0	0	0	0
87.5		0	0	0	0	0	0	0	0	0	0	0	0	0	0	0	0	0	0	0	0	0	0	0	0	0	0	0	0	0	0	0	0	0	0	0	0	0	0	0	0	0	0	0	0	0	0	0	0
88.5		0	0	0	0	0	0	0	0	0	0	0	0	0	0	0	0	0	0	0	0	0	0	0	0	0	0	0	0	0	0	0	0	0	0	0	0	0	0	0	0	0	0	0	0	0	0	0	0
89.5		0	0	0	0	0	0	0	0	0	0	0	0	0	0	0	0	0	0	0	0	0	0	0	0	0	0	0	0	0	0	0	0	0	0	0	0	0	0	0	0	0	0	0	0	0	0	0	0
90.5		0	0	0	0	0	0	0	0	0	0	0	0	0	0	0	0	0	0	0	0	0	0	0	0	0	0	0	0	0	0	0	0	0	0	0	0	0	0	0	0	0	0	0	0	0	0	0	0
91.5		0	0	0	0	0	0	0	0	0	0	0	0	0	0	0	0	0	0	0	0	0	0	0	0	0	0	0	0	0	0	0	0	0	0	0	0	0	0	0	0	0	0	0	0	0	0	0	0
92.5		0	0	0	0	0	0	0	0	0	0	0	0	0	0	0	0	0	0	0	0	0	0	0	0	0	0	0	0	0	0	0	0	0	0	0	0	0	0	0	0	0	0	0	0	0	0	0	0
93.5		0	0	0	0	0	0	0	0	0	0	0	0	0	0	0	0	0	0	0	0	0	0	0	0	0	0	0	0	0	0	0	0	0	0	0	0	0	0	0	0	0	0	0	0	0	0	0	0
94.5		0	0	0	0	0	0	0	0	0	0	0	0	0	0	0	0	0	0	0	0	0	0	0	0	0	0	0	0	0	0	0	0	0	0	0	0	0	0	0	0	0	0	0	0	0	0	0	0
95.5		0	0	0	0	0	0	0	0	0	0	0	0	0	0	0	0	0	0	0	0	0	0	0	0	0	0	0	0	0	0	0	0	0	0	0	0	0	0	0	0	0	0	0	0	0	0	0	0
96.5		0	0	0	0	0	0	0	0	0	0	0	0	0	0	0	0	0	0	0	0	0	0	0	0	0	0	0	0	0	0	0	0	0	0	0	0	0	0	0	0	0	0	0	0	0	0	0	0
97.5		0	0	0	0	0	0	0	0	0	0	0	0	0	0	0	0	0	0	0	0	0	0	0	0	0	0	0	0	0	0	0	0	0	0	0	0	0	0	0	0	0	0	0	0	0	0	0	0
98.5		0	0	0	0	0	0	0	0	0	0	0	0	0	0	0	0	0	0	0	0	0	0	0	0	0	0	0	0	0	0	0	0	0	0	0	0	0	0	0	0	0	0	0	0	0	0	0	0
99.5		0	0	0	0	0	0	0	0	0	0	0	0	0	0	0	0	0	0	0	0	0	0	0	0	0	0	0	0	0	0	0	0	0	0	0	0	0	0	0	0	0	0	0	0	0	0	0	0
100.5		0	0	0	0	0	0	0	0	0	0	0	0	0	0	0	0	0	0	0	0	0	0	0	0	0	0	0	0	0	0	0	0	0	0	0	0	0	0	0	0	0	0	0	0	0	0	0	0
	SUM=	2.80589e+06
[truncated: 53 more columns]
